# Supplementary material for: Lactic acid from vaginal microbiota enhances cervicovaginal epithelial barrier integrity by promoting tight junction protein expression
Source: Microbiome. 2022 Aug 31;10:141. doi: 10.1186/s40168-022-01337-5 (PMC9429363; doi:10.1186/s40168-022-01337-5)
Supplement: Supplementary file 3 — Additional file 2: Supplementary Table 1. Proteins with significantly different abundance in women with high as compared to low L-LDH and D-LDH abundance*. Supplementary Table 2. Barrier-related proteins with significantly different abundance in women with high as compared to low L-LDH abundance*. Supplementary Table 3. Genes differentially expressed by L-LA, D-LA and HCL treatment of Ect cells*. Supplementary Table 4. Gene ontology pathways significantly enriched by L-LA and D-LA treatment of Ect cells. Supplementary Table 5. Tight junction genes differentially expressed by L-LA, D-LA and HCL treatment of Ect cells*. Supplementary Table 6. Tight junction genes differentially expressed by treatment of VK2 cells with bacterial culture supernatants*. [file 40168_2022_1337_MOESM2_ESM.xlsx]

## Sheet: Supplementary Table 1
Supplementary Table 1: Proteins with significantly different abundance in women with high as compared to low L-LDH and D-LDH abundance*
* Log2fold change (LogFC) cut off > 0.5, false discovery rate (FDR) < 0.05. Shaded proteins indicate those associated with barrier function.
L-LDH										D-LDH:
Entry	Entry name	Protein names	LogFC	AveExpr	t	P.Value	FDR	B		Entry	Entry name	Protein names	LogFC	AveExpr	t	P.Value	FDR	B
A0A024R326	A0A024R326_HUMAN	60S ribosomal protein L29	7.64053	7.07849	3.27396	0.00140696	0.0270381	-1.11991		S6B291	S6B291_HUMAN	IgG H chain	-10.7696	19.9826	-4.92377	2.91343e-06	0.00386321	4.13488
A0A024R7M8	A0A024R7M8_HUMAN	Uncharacterized protein	4.32015	2.17919	3.21708	0.00168877	0.0309015	-1.27471		P05787	K2C8_HUMAN	Keratin, type II cytoskeletal 8 (Cytokeratin-8) (CK-8) (Keratin-8) (K8) (Type-II keratin Kb8)	10.1078	8.31644	4.52191	1.51716e-05	0.0100588	2.72069
A0A024R7S3	A0A024R7S3_HUMAN	Clathrin light chain	10.1351	15.5039	3.85159	0.000194899	0.00938475	0.57274		Q10588	BST1_HUMAN	ADP-ribosyl cyclase/cyclic ADP-ribose hydrolase 2 (EC 3.2.2.6) (ADP-ribosyl cyclase 2) (Bone marrow stromal antigen 1) (BST-1) (Cyclic ADP-ribose hydrolase 2) (cADPr hydrolase 2) (CD antigen CD157)	-7.17724	4.19202	-4.02241	0.000104284	0.0393188	1.07617
A0A087WTP3	A0A087WTP3_HUMAN	Far upstream element-binding protein 2	10.5508	13.2278	4.54904	1.36083e-05	0.00226339	2.88219		A3EZ80	DMKN_HUMAN	Dermokine (Epidermis-specific secreted protein SK30/SK89)	9.20937	9.18041	3.98765	0.000118609	0.0393188	0.966796
A0A087X0D5	A0A087X0D5_HUMAN	Pro-cathepsin H	8.66028	18.6817	3.64139	0.000410354	0.0149116	-0.0678588
A0A140VJJ6	A0A140VJJ6_HUMAN	Testicular tissue protein Li 70	-6.23973	24.4286	-3.19319	0.00182219	0.0317924	-1.33909
A0A286YF22	A0A286YF22_HUMAN	D-3-phosphoglycerate dehydrogenase (EC 1.1.1.95)	7.98442	7.36292	3.74812	0.000282162	0.0110043	0.254005
A8MQ03	CRTP1_HUMAN	Cysteine-rich tail protein 1	8.25804	5.17315	4.22092	4.93138e-05	0.00435934	1.76208
B3KUF5	B3KUF5_HUMAN	cDNA FLJ39747 fis, clone SMINT2017432, highly similar to Target of Myb protein 1	8.53996	10.1994	3.53037	0.000601102	0.0185602	-0.395009
B3KWJ0	B3KWJ0_HUMAN	cDNA FLJ43147 fis, clone CTONG3008639, highly similar to Absent in melanoma 1 protein (Fragment)	8.96216	16.576	3.87486	0.000179173	0.00938475	0.645312
B4DFI6	B4DFI6_HUMAN	60S ribosomal protein L4	8.71834	12.1388	3.37135	0.00102391	0.0224265	-0.849709
B4DQF1	B4DQF1_HUMAN	cDNA FLJ55810, highly similar to Golgi reassembly-stacking protein 2	7.75249	7.3125	3.56415	0.000535652	0.0177569	-0.296319
B4DRR0	B4DRR0_HUMAN	cDNA FLJ53910, highly similar to Keratin, type II cytoskeletal 6A	3.21541	32.2773	3.28305	0.00136619	0.0266407	-1.09494
B4DRW1	B4DRW1_HUMAN	cDNA FLJ55805, highly similar to Keratin, type II cytoskeletal 4	2.81501	32.8663	3.41341	0.000890833	0.022277	-0.731062
B4DVG7	B4DVG7_HUMAN	cDNA FLJ53750, highly similar to 60S ribosomal protein L8	7.72627	4.89833	4.01342	0.00010782	0.00680803	1.08413
B4DWA1	B4DWA1_HUMAN	Brain-specific angiogenesis inhibitor 1-associated protein 2	6.57797	5.64461	3.3628	0.00105315	0.0224265	-0.873682
B4DWL1	B4DWL1_HUMAN	cDNA FLJ59240, highly similar to Far upstream element-binding protein 1	6.65956	19.8829	3.21224	0.00171504	0.0309015	-1.28779
B4E273	B4E273_HUMAN	ADP-ribosylation factor interacting protein 1 (Arfaptin 1), isoform CRA_b (ARFIP1 protein) (cDNA FLJ53696, highly similar to Arfaptin-1)	5.54801	3.71468	3.36737	0.00103744	0.0224265	-0.860889
B8ZZT4	B8ZZT4_HUMAN	Vesicle-associated membrane protein 8	5.75028	3.41184	3.37651	0.00100665	0.0224265	-0.835228
C9J9W2	C9J9W2_HUMAN	LIM and SH3 domain protein 1 (Fragment)	8.64327	12.2792	3.43263	0.000835605	0.022277	-0.676469
E5RH77	E5RH77_HUMAN	40S ribosomal protein S14	5.68097	3.36148	3.38547	0.00097729	0.0224265	-0.810013
E5RIP1	E5RIP1_HUMAN	40S ribosomal protein S20	8.33584	12.8621	3.01485	0.00317385	0.0461342	-1.80703
E7ET48	E7ET48_HUMAN	Beta/gamma crystallin domain-containing protein 2	9.91529	9.59301	4.4855	1.75438e-05	0.00258478	2.66085
E9PK71	E9PK71_HUMAN	Plakophilin-3 (Fragment)	7.25659	8.04476	3.20887	0.0017336	0.0309015	-1.2969
E9PKZ0	E9PKZ0_HUMAN	60S ribosomal protein L8 (Fragment)	6.04291	5.04155	3.06674	0.00270689	0.0417364	-1.67319
E9PMS6	E9PMS6_HUMAN	LIM domain only protein 7	9.45273	14.1913	3.92425	0.0001497	0.00902286	0.800451
E9PPU1	E9PPU1_HUMAN	40S ribosomal protein S3	6.79314	7.75874	3.03562	0.00297867	0.0443789	-1.75369
E9PQ15	E9PQ15_HUMAN	Plakophilin-3 (Fragment)	11.3061	10.5712	4.88859	3.37722e-06	0.000895639	4.09888
E9PR44	E9PR44_HUMAN	Alpha-crystallin B chain (Fragment)	10.4742	11.067	4.13743	6.77641e-05	0.0052856	1.48635
F5GXY2	F5GXY2_HUMAN	L-lactate dehydrogenase A chain (Fragment)	-6.80401	6.02481	-3.15667	0.00204522	0.0338995	-1.43674
G3XAF7	G3XAF7_HUMAN	Breast carcinoma amplified sequence 1, isoform CRA_c (Breast carcinoma-amplified sequence 1)	7.03649	8.12753	3.21094	0.00172216	0.0309015	-1.2913
H7BXR3	H7BXR3_HUMAN	Sorbin and SH3 domain-containing protein 2 (Fragment)	5.11923	3.97876	2.97741	0.00355592	0.0491162	-1.90244
J3KRI4	J3KRI4_HUMAN	Dynein light intermediate chain (Fragment)	6.27193	4.60216	3.40934	0.00090296	0.022277	-0.74259
J3KT51	J3KT51_HUMAN	Jupiter microtubule-associated homolog 1	12.9718	14.2867	5.22079	8.16964e-07	0.000431871	5.34087
J3QS39	J3QS39_HUMAN	Polyubiquitin-B (Fragment)	0.818838	35.1418	3.10229	0.00242465	0.0385493	-1.5804
O00204	ST2B1_HUMAN	Sulfotransferase 2B1 (EC 2.8.2.2) (Alcohol sulfotransferase) (Hydroxysteroid sulfotransferase 2) (Sulfotransferase family 2B member 1) (Sulfotransferase family cytosolic 2B member 1) (ST2B1)	8.66454	11.3619	3.53202	0.00059775	0.0185602	-0.390224
O43768	ENSA_HUMAN	Alpha-endosulfine (ARPP-19e)	8.0434	17.8977	3.03609	0.00297442	0.0443789	-1.75249
O60869	EDF1_HUMAN	Endothelial differentiation-related factor 1 (EDF-1) (Multiprotein-bridging factor 1) (MBF1)	3.94552	1.99022	3.00164	0.00330415	0.0461761	-1.84082
O95182	NDUA7_HUMAN	NADH dehydrogenase [ubiquinone] 1 alpha subcomplex subunit 7 (Complex I-B14.5a) (CI-B14.5a) (NADH-ubiquinone oxidoreductase subunit B14.5a)	4.04306	2.03942	3.00123	0.00330825	0.0461761	-1.84186
P01040	CYTA_HUMAN	Cystatin-A (Cystatin-AS) (Stefin-A) [Cleaved into: Cystatin-A, N-terminally processed]	1.34506	36.9654	3.80815	0.00022784	0.00955645	0.438128
P05787	K2C8_HUMAN	Keratin, type II cytoskeletal 8 (Cytokeratin-8) (CK-8) (Keratin-8) (K8) (Type-II keratin Kb8)	9.74338	8.31644	4.40441	2.41825e-05	0.0032066	2.38143
P09493	TPM1_HUMAN	Tropomyosin alpha-1 chain (Alpha-tropomyosin) (Tropomyosin-1)	8.39109	10.3495	3.62841	0.000429266	0.0149791	-0.106521
P10599	THIO_HUMAN	Thioredoxin (Trx) (ATL-derived factor) (ADF) (Surface-associated sulphydryl protein) (SASP) (allergen Hom s Trx)	0.992122	35.8483	3.40008	0.000931146	0.0224265	-0.768795
P13646	K1C13_HUMAN	Keratin, type I cytoskeletal 13 (Cytokeratin-13) (CK-13) (Keratin-13) (K13)	2.10523	33.8778	3.80476	0.000230623	0.00955645	0.427665
P15924	DESP_HUMAN	Desmoplakin (DP) (250/210 kDa paraneoplastic pemphigus antigen)	4.00066	25.6659	3.2063	0.00174782	0.0309015	-1.30382
P16989	YBOX3_HUMAN	Y-box-binding protein 3 (Cold shock domain-containing protein A) (DNA-binding protein A) (Single-strand DNA-binding protein NF-GMB)	6.77289	23.7635	3.2913	0.00133017	0.0263255	-1.07226
P19012	K1C15_HUMAN	Keratin, type I cytoskeletal 15 (Cytokeratin-15) (CK-15) (Keratin-15) (K15)	7.6871	12.3003	3.12317	0.00227184	0.0371908	-1.52549
P19957	ELAF_HUMAN	Elafin (Elastase-specific inhibitor) (ESI) (Peptidase inhibitor 3) (PI-3) (Protease inhibitor WAP3) (Skin-derived antileukoproteinase) (SKALP) (WAP four-disulfide core domain protein 14)	9.77363	18.5285	3.41476	0.000886849	0.022277	-0.727239
P20930	FILA_HUMAN	Filaggrin	8.98559	16.139	3.82971	0.000210882	0.00938475	0.504784
P22307	SCP2_HUMAN	Sterol carrier protein 2 (SCP-2) (Acetyl-CoA C-myristoyltransferase) (EC 2.3.1.155) (Non-specific lipid-transfer protein) (NSL-TP) (Propanoyl-CoA C-acyltransferase) (EC 2.3.1.176) (SCP-2/3-oxoacyl-CoA thiolase) (SCP-2/thiolase) (EC 2.3.1.16) (SCP-chi) (SCPX) (Sterol carrier protein X) (SCP-X) (Straight-chain acyl-CoA oxidase) (SCOX)	9.31664	11.763	3.68178	0.000356438	0.0135039	0.053093
P26373	RL13_HUMAN	60S ribosomal protein L13 (Breast basic conserved protein 1) (Large ribosomal subunit protein eL13)	8.99037	10.2192	3.56875	0.000527273	0.0177569	-0.282814
P27816	MAP4_HUMAN	Microtubule-associated protein 4 (MAP-4)	8.58993	16.8658	3.78097	0.000251077	0.0100887	0.354475
P28799	GRN_HUMAN	Progranulin (PGRN) (Acrogranin) (Epithelin precursor) (Glycoprotein of 88 Kda) (GP88) (Glycoprotein 88) (Granulin precursor) (PC cell-derived growth factor) (PCDGF) (Proepithelin) (PEPI) [Cleaved into: Paragranulin; Granulin-1 (Granulin G); Granulin-2 (Granulin F); Granulin-3 (Epithelin-2) (Granulin B); Granulin-4 (Epithelin-1) (Granulin A); Granulin-5 (Granulin C); Granulin-6 (Granulin D); Granu…	5.66428	3.778	3.38328	0.000984382	0.0224265	-0.816173
P39019	RS19_HUMAN	40S ribosomal protein S19 (Small ribosomal subunit protein eS19)	6.15813	4.68599	3.16268	0.00200686	0.0336847	-1.42074
P42167	LAP2B_HUMAN	Lamina-associated polypeptide 2, isoforms beta/gamma (Thymopoietin, isoforms beta/gamma) (TP beta/gamma) (Thymopoietin-related peptide isoforms beta/gamma) (TPRP isoforms beta/gamma) [Cleaved into: Thymopoietin (TP) (Splenin); Thymopentin (TP5)]	8.41056	18.7804	3.50697	0.000650809	0.0193691	-0.462971
P55145	MANF_HUMAN	Mesencephalic astrocyte-derived neurotrophic factor (Arginine-rich protein) (Protein ARMET)	6.02475	24.4281	3.01219	0.00319977	0.0461342	-1.81386
P61457	PHS_HUMAN	Pterin-4-alpha-carbinolamine dehydratase (PHS) (EC 4.2.1.96) (4-alpha-hydroxy-tetrahydropterin dehydratase) (Dimerization cofactor of hepatocyte nuclear factor 1-alpha) (DCoH) (Dimerization cofactor of HNF1) (Phenylalanine hydroxylase-stimulating protein) (Pterin carbinolamine dehydratase) (PCD)	8.18179	19.1529	3.26029	0.00147038	0.0278533	-1.15732
P67936	TPM4_HUMAN	Tropomyosin alpha-4 chain (TM30p1) (Tropomyosin-4)	0.86945	33.3767	3.10688	0.00239026	0.0385493	-1.56836
Q02878	RL6_HUMAN	60S ribosomal protein L6 (Large ribosomal subunit protein eL6) (Neoplasm-related protein C140) (Tax-responsive enhancer element-binding protein 107) (TaxREB107)	9.00659	8.96491	3.87438	0.000179485	0.00938475	0.643811
Q07157	ZO1_HUMAN	Tight junction protein ZO-1 (Tight junction protein 1) (Zona occludens protein 1) (Zonula occludens protein 1)	9.45515	12.9668	4.26685	4.13327e-05	0.00414339	1.91539
Q13442	HAP28_HUMAN	28 kDa heat- and acid-stable phosphoprotein (PDGF-associated protein) (PAP) (PDGFA-associated protein 1) (PAP1)	10.826	16.6926	4.30571	3.55626e-05	0.00392967	2.04603
Q14134	TRI29_HUMAN	Tripartite motif-containing protein 29 (Ataxia telangiectasia group D-associated protein)	8.7219	15.8821	3.42703	0.000851349	0.022277	-0.692395
Q15056	IF4H_HUMAN	Eukaryotic translation initiation factor 4H (eIF-4H) (Williams-Beuren syndrome chromosomal region 1 protein)	12.2514	13.1689	5.14639	1.12777e-06	0.000431871	5.05853
Q16890	TPD53_HUMAN	Tumor protein D53 (hD53) (Tumor protein D52-like 1)	8.67355	14.1432	3.31903	0.0012155	0.0251836	-0.99565
Q4W5K9	Q4W5K9_HUMAN	Uncharacterized protein LIM (Fragment)	6.59123	5.30059	3.2955	0.00131219	0.0263255	-1.0607
Q53GY1	Q53GY1_HUMAN	BCL2-associated athanogene 3 variant (Fragment)	7.03549	19.8714	3.17606	0.00192379	0.0327044	-1.38499
Q53R94	Q53R94_HUMAN	Uncharacterized protein RTN4 (Fragment)	12.2345	9.82723	5.11291	1.30278e-06	0.000431871	4.93224
Q567R9	Q567R9_HUMAN	CIP29 protein	7.92853	7.98464	3.48089	0.000710753	0.0201773	-0.538288
Q5T0I0	Q5T0I0_HUMAN	Macrophage-capping protein (Actin regulatory protein CAP-G) (Fragment)	-6.70909	4.80138	-3.50403	0.000657321	0.0193691	-0.471485
Q5T0Z8	CF132_HUMAN	Uncharacterized protein C6orf132	9.85646	16.7559	4.17686	5.83489e-05	0.00483567	1.61608
Q5T7C4	Q5T7C4_HUMAN	High mobility group protein B1	10.8084	14.4336	4.06286	8.96918e-05	0.00624761	1.24345
Q5TBU5	Q5TBU5_HUMAN	HCG1773630 (cDNA, FLJ92308, Homo sapiens adipose specific 2 (APM2), mRNA)	8.64906	15.4382	3.00528	0.00326779	0.0461761	-1.83153
Q6IPJ9	Q6IPJ9_HUMAN	Ladinin-1 (Lad-1)	7.34175	20.2217	3.0363	0.00297252	0.0443789	-1.75195
Q6KB66	K2C80_HUMAN	Keratin, type II cytoskeletal 80 (Cytokeratin-80) (CK-80) (Keratin-80) (K80) (Type-II keratin Kb20)	6.04696	5.8918	3.01207	0.00320087	0.0461342	-1.81415
Q6P2D7	Q6P2D7_HUMAN	HNRPM protein (Fragment)	6.64544	4.25037	3.82781	0.000212325	0.00938475	0.498905
Q6WKZ4	RFIP1_HUMAN	Rab11 family-interacting protein 1 (Rab11-FIP1) (Rab-coupling protein)	7.07832	10.2518	3.09999	0.00244204	0.0385493	-1.58643
Q6ZRV2	FA83H_HUMAN	Protein FAM83H	11.8798	7.73924	6.34346	4.76304e-09	6.31579e-06	9.85144
Q70T18	Q70T18_HUMAN	BBF2H7/FUS protein (Fragment)	11.3578	14.4887	4.76026	5.75903e-06	0.00127275	3.63251
Q7Z351	Q7Z351_HUMAN	Uncharacterized protein DKFZp686N02209	7.7821	8.3446	3.40793	0.000907207	0.022277	-0.746591
Q8IVF2	AHNK2_HUMAN	Protein AHNAK2	6.46454	16.2047	3.06983	0.00268122	0.0417364	-1.66516
Q8IZ21	PHAR4_HUMAN	Phosphatase and actin regulator 4	4.9653	2.95169	3.35926	0.00106551	0.0224265	-0.883614
Q8WUF5	IASPP_HUMAN	RelA-associated inhibitor (Inhibitor of ASPP protein) (Protein iASPP) (NFkB-interacting protein 1) (PPP1R13B-like protein)	6.579	5.10792	3.52999	0.000601878	0.0185602	-0.396113
Q8WWA1	TMM40_HUMAN	Transmembrane protein 40	10.4237	19.4207	4.11562	7.35798e-05	0.00542038	1.41498
Q92597	NDRG1_HUMAN	Protein NDRG1 (Differentiation-related gene 1 protein) (DRG-1) (N-myc downstream-regulated gene 1 protein) (Nickel-specific induction protein Cap43) (Reducing agents and tunicamycin-responsive protein) (RTP) (Rit42)	10.878	16.3888	4.25212	4.37462e-05	0.00414339	1.86609
Q96FS1	Q96FS1_HUMAN	CTNND1 protein (Fragment)	8.56042	6.07544	4.54818	1.36555e-05	0.00226339	2.87917
Q9BQI0	AIF1L_HUMAN	Allograft inflammatory factor 1-like (Ionized calcium-binding adapter molecule 2)	8.96611	8.99398	3.84065	0.00020274	0.00938475	0.538726
Q9BSV4	Q9BSV4_HUMAN	SFPQ protein (Fragment)	7.15811	5.02156	3.83517	0.000206782	0.00938475	0.521709
Q9BW04	SARG_HUMAN	Specifically androgen-regulated gene protein	9.91292	21.027	4.34991	2.99419e-05	0.00360936	2.19559
Q9C002	NMES1_HUMAN	Normal mucosa of esophagus-specific gene 1 protein (Protein FOAP-11)	7.76369	8.04568	3.29171	0.00132841	0.0263255	-1.07113
Q9C0C2	TB182_HUMAN	182 kDa tankyrase-1-binding protein	7.43636	8.5814	3.43027	0.000842195	0.022277	-0.683172
Q9NQ38	ISK5_HUMAN	Serine protease inhibitor Kazal-type 5 (Lympho-epithelial Kazal-type-related inhibitor) (LEKTI) [Cleaved into: Hemofiltrate peptide HF6478; Hemofiltrate peptide HF7665]	1.35851	30.5002	3.85574	0.000191999	0.00938475	0.585669
Q9P2E9	RRBP1_HUMAN	Ribosome-binding protein 1 (180 kDa ribosome receptor homolog) (RRp) (ES/130-related protein) (Ribosome receptor protein)	8.83108	15.4348	4.04964	9.42325e-05	0.00624761	1.2007
Q9UJU6	DBNL_HUMAN	Drebrin-like protein (Cervical SH3P7) (Cervical mucin-associated protein) (Drebrin-F) (HPK1-interacting protein of 55 kDa) (HIP-55) (SH3 domain-containing protein 7)	9.27142	15.7334	3.6374	0.000416086	0.0149116	-0.0797646
Q9UJY1	HSPB8_HUMAN	Heat shock protein beta-8 (HspB8) (Alpha-crystallin C chain) (E2-induced gene 1 protein) (Protein kinase H11) (Small stress protein-like protein HSP22)	5.407	3.19854	3.38533	0.000977756	0.0224265	-0.810418
Q9UNZ2	NSF1C_HUMAN	NSFL1 cofactor p47 (UBX domain-containing protein 2C) (p97 cofactor p47)	6.15463	23.2777	3.47904	0.000715183	0.0201773	-0.543596
V9HVY1	V9HVY1_HUMAN	Fibrinogen beta chain (Fibrinopeptide B)	-6.8672	22.6398	-3.18633	0.00186228	0.0320699	-1.35751

## Sheet: Supplementary Table 2
Supplementary Table 2: Barrier-related proteins with significantly different abundance in women with high as compared to low L-LDH abundance*
* Log2fold change (LogFC) cut off > 0.5, false discovery rate (FDR) < 0.05. Shaded proteins indicate those remaining significantly associated with L-LDH levels after adjustments (see footnotes).
Entry	Entry name	Protein names	Gene names	LogFC	AveExpr	t	B	P.Value	FDR	Adjusted p1	Gene ontology (biological process)	Gene ontology (cellular component)	Gene ontology (molecular function)
B4DRR0	B4DRR0_HUMAN	cDNA FLJ53910, highly similar to Keratin, type II cytoskeletal 6A		3.21541	32.2773	3.28305	-1.09494	0.00136619	0.0266407	0.15967		keratin filament [GO:0045095]
B4DRW1	B4DRW1_HUMAN	cDNA FLJ55805, highly similar to Keratin, type II cytoskeletal 4		2.81501	32.8663	3.41341	-0.731062	0.000890833	0.022277	0.2104		keratin filament [GO:0045095]
E9PK71	E9PK71_HUMAN	Plakophilin-3 (Fragment)	PKP3	7.25659	8.04476	3.20887	-1.2969	0.0017336	0.0309015	0.51673	cell-cell adhesion [GO:0098609]	desmosome [GO:0030057]; nucleus [GO:0005634]
E9PMS6	E9PMS6_HUMAN	LIM domain only protein 7	LMO7	9.45273	14.1913	3.92425	0.800451	0.0001497	0.00902286	0.328	regulation of cell adhesion [GO:0030155]; regulation of signaling [GO:0023051]	integral component of membrane [GO:0016021]	metal ion binding [GO:0046872]
E9PQ15	E9PQ15_HUMAN	Plakophilin-3 (Fragment)	PKP3	11.3061	10.5712	4.88859	4.09888	3.37722e-06	0.000895639	0.075	cell-cell adhesion [GO:0098609]	desmosome [GO:0030057]; nucleus [GO:0005634]
H7BXR3	H7BXR3_HUMAN	Sorbin and SH3 domain-containing protein 2 (Fragment)	SORBS2	5.11923	3.97876	2.97741	-1.90244	0.00355592	0.0491162	0.3365	actin filament organization [GO:0007015]	cytoplasm [GO:0005737]; focal adhesion [GO:0005925]; membrane [GO:0016020]
O60869	EDF1_HUMAN	Endothelial differentiation-related factor 1 (EDF-1) (Multiprotein-bridging factor 1) (MBF1)	EDF1	3.94552	1.99022	3.00164	-1.84082	0.00330415	0.0461761	0.989	endothelial cell differentiation [GO:0045446]; multicellular organism development [GO:0007275]; positive regulation of DNA binding [GO:0043388]; positive regulation of transcription, DNA-templated [GO:0045893]; regulation of lipid metabolic process [GO:0019216]; regulation of transcription, DNA-templated [GO:0006355]	cytoplasm [GO:0005737]; cytosol [GO:0005829]; intracellular anatomical structure [GO:0005622]; nucleolus [GO:0005730]; nucleoplasm [GO:0005654]; nucleus [GO:0005634]	calmodulin binding [GO:0005516]; DNA binding [GO:0003677]; RNA binding [GO:0003723]; TFIID-class transcription factor complex binding [GO:0001094]; transcription coactivator activity [GO:0003713]
P01040	CYTA_HUMAN	Cystatin-A (Cystatin-AS) (Stefin-A) [Cleaved into: Cystatin-A, N-terminally processed]	CSTA STF1 STFA	1.34506	36.9654	3.80815	0.438128	0.00022784	0.00955645	0.02179	cell-cell adhesion [GO:0098609]; cornification [GO:0070268]; keratinocyte differentiation [GO:0030216]; negative regulation of peptidase activity [GO:0010466]; negative regulation of proteolysis [GO:0045861]; peptide cross-linking [GO:0018149]	cornified envelope [GO:0001533]; cytoplasm [GO:0005737]; cytosol [GO:0005829]; extracellular space [GO:0005615]; nucleoplasm [GO:0005654]	cysteine-type endopeptidase inhibitor activity [GO:0004869]; protease binding [GO:0002020]
P05787	K2C8_HUMAN	Keratin, type II cytoskeletal 8 (Cytokeratin-8) (CK-8) (Keratin-8) (K8) (Type-II keratin Kb8)	KRT8 CYK8	9.74338	8.31644	4.40441	2.38143	2.41825e-05	0.0032066	0.0367	cell differentiation involved in embryonic placenta development [GO:0060706]; cornification [GO:0070268]; extrinsic apoptotic signaling pathway [GO:0097191]; hepatocyte apoptotic process [GO:0097284]; keratinization [GO:0031424]; response to hydrostatic pressure [GO:0051599]; response to other organism [GO:0051707]; sarcomere organization [GO:0045214]; tumor necrosis factor-mediated signaling pat…	apicolateral plasma membrane [GO:0016327]; cell-cell junction [GO:0005911]; costamere [GO:0043034]; cytoplasm [GO:0005737]; cytosol [GO:0005829]; dystrophin-associated glycoprotein complex [GO:0016010]; extracellular exosome [GO:0070062]; intermediate filament [GO:0005882]; intermediate filament cytoskeleton [GO:0045111]; keratin filament [GO:0045095]; nuclear matrix [GO:0016363]; nucleoplasm [GO…	protein-containing complex binding [GO:0044877]; scaffold protein binding [GO:0097110]
P09493	TPM1_HUMAN	Tropomyosin alpha-1 chain (Alpha-tropomyosin) (Tropomyosin-1)	TPM1 C15orf13 TMSA	8.39109	10.3495	3.62841	-0.106521	0.000429266	0.0149791	0.03591	actin filament organization [GO:0007015]; cardiac muscle contraction [GO:0060048]; cellular response to reactive oxygen species [GO:0034614]; cytoskeleton organization [GO:0007010]; muscle contraction [GO:0006936]; muscle filament sliding [GO:0030049]; negative regulation of cell migration [GO:0030336]; negative regulation of vascular associated smooth muscle cell migration [GO:1904753]; negative…	actin cytoskeleton [GO:0015629]; actin filament [GO:0005884]; bleb [GO:0032059]; cytoskeleton [GO:0005856]; cytosol [GO:0005829]; muscle thin filament tropomyosin [GO:0005862]; ruffle membrane [GO:0032587]; sarcomere [GO:0030017]; stress fiber [GO:0001725]	actin binding [GO:0003779]; actin filament binding [GO:0051015]; cytoskeletal protein binding [GO:0008092]; identical protein binding [GO:0042802]; protein heterodimerization activity [GO:0046982]; protein homodimerization activity [GO:0042803]; structural constituent of cytoskeleton [GO:0005200]; structural constituent of muscle [GO:0008307]
P13646	K1C13_HUMAN	Keratin, type I cytoskeletal 13 (Cytokeratin-13) (CK-13) (Keratin-13) (K13)	KRT13	2.10523	33.8778	3.80476	0.427665	0.000230623	0.00955645	0.1452	cornification [GO:0070268]; cytoskeleton organization [GO:0007010]; keratinization [GO:0031424]	cytosol [GO:0005829]; extracellular exosome [GO:0070062]; intermediate filament cytoskeleton [GO:0045111]; keratin filament [GO:0045095]; nucleus [GO:0005634]	structural molecule activity [GO:0005198]
P15924	DESP_HUMAN	Desmoplakin (DP) (250/210 kDa paraneoplastic pemphigus antigen)	DSP	4.00066	25.6659	3.2063	-1.30382	0.00174782	0.0309015	0.10189	adherens junction organization [GO:0034332]; bundle of His cell-Purkinje myocyte adhesion involved in cell communication [GO:0086073]; cell-cell adhesion [GO:0098609]; cornification [GO:0070268]; desmosome organization [GO:0002934]; epidermis development [GO:0008544]; epithelial cell-cell adhesion [GO:0090136]; intermediate filament cytoskeleton organization [GO:0045104]; intermediate filament or…	basolateral plasma membrane [GO:0016323]; cornified envelope [GO:0001533]; cytoplasm [GO:0005737]; desmosome [GO:0030057]; extracellular exosome [GO:0070062]; fascia adherens [GO:0005916]; ficolin-1-rich granule membrane [GO:0101003]; intercalated disc [GO:0014704]; intermediate filament [GO:0005882]; membrane [GO:0016020]; nucleus [GO:0005634]; plasma membrane [GO:0005886]	cell adhesive protein binding involved in bundle of His cell-Purkinje myocyte communication [GO:0086083]; protein kinase C binding [GO:0005080]; RNA binding [GO:0003723]; scaffold protein binding [GO:0097110]; structural constituent of cytoskeleton [GO:0005200]; structural molecule activity [GO:0005198]
P16989	YBOX3_HUMAN	Y-box-binding protein 3 (Cold shock domain-containing protein A) (DNA-binding protein A) (Single-strand DNA-binding protein NF-GMB)	YBX3 CSDA DBPA	6.77289	23.7635	3.2913	-1.07226	0.00133017	0.0263255	0.161111	3'-UTR-mediated mRNA stabilization [GO:0070935]; cellular hyperosmotic response [GO:0071474]; cellular response to tumor necrosis factor [GO:0071356]; fertilization [GO:0009566]; in utero embryonic development [GO:0001701]; male gonad development [GO:0008584]; negative regulation of intrinsic apoptotic signaling pathway in response to osmotic stress [GO:1902219]; negative regulation of necroptoti…	bicellular tight junction [GO:0005923]; cytoplasm [GO:0005737]; cytosol [GO:0005829]; nucleus [GO:0005634]; perinuclear region of cytoplasm [GO:0048471]	mRNA 3'-UTR binding [GO:0003730]; nucleic acid binding [GO:0003676]; polysome binding [GO:1905538]; RNA binding [GO:0003723]; RNA polymerase II transcription regulatory region sequence-specific DNA binding [GO:0000977]; small GTPase binding [GO:0031267]
P19012	K1C15_HUMAN	Keratin, type I cytoskeletal 15 (Cytokeratin-15) (CK-15) (Keratin-15) (K15)	KRT15 KRTB	7.6871	12.3003	3.12317	-1.52549	0.00227184	0.0371908	0.93456	cornification [GO:0070268]; epidermis development [GO:0008544]; keratinization [GO:0031424]	cytosol [GO:0005829]; extracellular exosome [GO:0070062]; intermediate filament [GO:0005882]; nucleus [GO:0005634]	scaffold protein binding [GO:0097110]; structural constituent of cytoskeleton [GO:0005200]
P19957	ELAF_HUMAN	Elafin (Elastase-specific inhibitor) (ESI) (Peptidase inhibitor 3) (PI-3) (Protease inhibitor WAP3) (Skin-derived antileukoproteinase) (SKALP) (WAP four-disulfide core domain protein 14)	PI3 WAP3 WFDC14	9.77363	18.5285	3.41476	-0.727239	0.000886849	0.022277	0.10001	antibacterial humoral response [GO:0019731]; antimicrobial humoral response [GO:0019730]; copulation [GO:0007620]; cornification [GO:0070268]; innate immune response [GO:0045087]; peptide cross-linking [GO:0018149]	cornified envelope [GO:0001533]; cytosol [GO:0005829]; extracellular matrix [GO:0031012]; extracellular region [GO:0005576]; extracellular space [GO:0005615]	endopeptidase inhibitor activity [GO:0004866]; serine-type endopeptidase inhibitor activity [GO:0004867]; structural constituent of skin epidermis [GO:0030280]
P20930	FILA_HUMAN	Filaggrin	FLG	8.98559	16.139	3.82971	0.504784	0.000210882	0.00938475	0.04945	cornification [GO:0070268]; establishment of skin barrier [GO:0061436]; keratinocyte differentiation [GO:0030216]; multicellular organism development [GO:0007275]; peptide cross-linking [GO:0018149]	collagen-containing extracellular matrix [GO:0062023]; cornified envelope [GO:0001533]; cytoplasmic ribonucleoprotein granule [GO:0036464]; cytosol [GO:0005829]; intermediate filament [GO:0005882]; keratohyalin granule [GO:0036457]; nucleus [GO:0005634]	calcium ion binding [GO:0005509]; structural constituent of skin epidermis [GO:0030280]; structural molecule activity [GO:0005198]; transition metal ion binding [GO:0046914]
P39019	RS19_HUMAN	40S ribosomal protein S19 (Small ribosomal subunit protein eS19)	RPS19	6.15813	4.68599	3.16268	-1.42074	0.00200686	0.0336847	0.13458	antimicrobial humoral immune response mediated by antimicrobial peptide [GO:0061844]; defense response to Gram-negative bacterium [GO:0050829]; erythrocyte differentiation [GO:0030218]; killing of cells of other organism [GO:0031640]; maturation of SSU-rRNA [GO:0030490]; maturation of SSU-rRNA from tricistronic rRNA transcript (SSU-rRNA, 5.8S rRNA, LSU-rRNA) [GO:0000462]; monocyte chemotaxis [GO:…	cytoplasm [GO:0005737]; cytosol [GO:0005829]; cytosolic small ribosomal subunit [GO:0022627]; extracellular exosome [GO:0070062]; focal adhesion [GO:0005925]; membrane [GO:0016020]; nucleolus [GO:0005730]; nucleoplasm [GO:0005654]; postsynaptic density [GO:0014069]; ribosome [GO:0005840]	fibroblast growth factor binding [GO:0017134]; identical protein binding [GO:0042802]; protein kinase binding [GO:0019901]; RNA binding [GO:0003723]; structural constituent of ribosome [GO:0003735]
P67936	TPM4_HUMAN	Tropomyosin alpha-4 chain (TM30p1) (Tropomyosin-4)	TPM4	0.86945	33.3767	3.10688	-1.56836	0.00239026	0.0385493	0.05688	actin filament organization [GO:0007015]; muscle contraction [GO:0006936]; muscle filament sliding [GO:0030049]; osteoblast differentiation [GO:0001649]	actin filament [GO:0005884]; cytoskeleton [GO:0005856]; cytosol [GO:0005829]; extracellular exosome [GO:0070062]; focal adhesion [GO:0005925]; membrane [GO:0016020]; muscle thin filament tropomyosin [GO:0005862]; stress fiber [GO:0001725]	actin filament binding [GO:0051015]; calcium ion binding [GO:0005509]; identical protein binding [GO:0042802]; protein heterodimerization activity [GO:0046982]; protein homodimerization activity [GO:0042803]; structural constituent of muscle [GO:0008307]
Q02878	RL6_HUMAN	60S ribosomal protein L6 (Large ribosomal subunit protein eL6) (Neoplasm-related protein C140) (Tax-responsive enhancer element-binding protein 107) (TaxREB107)	RPL6 TXREB1	9.00659	8.96491	3.87438	0.643811	0.000179485	0.00938475	0.13882	cytoplasmic translation [GO:0002181]; nuclear-transcribed mRNA catabolic process, nonsense-mediated decay [GO:0000184]; regulation of transcription, DNA-templated [GO:0006355]; ribosomal large subunit assembly [GO:0000027]; rRNA processing [GO:0006364]; SRP-dependent cotranslational protein targeting to membrane [GO:0006614]; translation [GO:0006412]; translational initiation [GO:0006413]; viral …	cytoplasmic ribonucleoprotein granule [GO:0036464]; cytosol [GO:0005829]; cytosolic large ribosomal subunit [GO:0022625]; focal adhesion [GO:0005925]; membrane [GO:0016020]; nucleus [GO:0005634]; polysomal ribosome [GO:0042788]; postsynaptic density [GO:0014069]; rough endoplasmic reticulum [GO:0005791]	cadherin binding [GO:0045296]; DNA binding [GO:0003677]; RNA binding [GO:0003723]; structural constituent of ribosome [GO:0003735]
Q07157	ZO1_HUMAN	Tight junction protein ZO-1 (Tight junction protein 1) (Zona occludens protein 1) (Zonula occludens protein 1)	TJP1 ZO1	9.45515	12.9668	4.26685	1.91539	4.13327e-05	0.00414339	0.02	actomyosin structure organization [GO:0031032]; adherens junction maintenance [GO:0034334]; cell-cell adhesion [GO:0098609]; cell-cell junction assembly [GO:0007043]; cell-cell junction organization [GO:0045216]; establishment of endothelial intestinal barrier [GO:0090557]; hippo signaling [GO:0035329]; maintenance of blood-brain barrier [GO:0035633]; negative regulation of actin cytoskeleton reo…	adherens junction [GO:0005912]; apical junction complex [GO:0043296]; apical part of cell [GO:0045177]; basolateral plasma membrane [GO:0016323]; bicellular tight junction [GO:0005923]; cell junction [GO:0030054]; cell projection [GO:0042995]; cytoplasm [GO:0005737]; cytosol [GO:0005829]; gap junction [GO:0005921]; plasma membrane [GO:0005886]; podosome [GO:0002102]; protein-containing complex [G…	cadherin binding [GO:0045296]; calmodulin binding [GO:0005516]; cell adhesion molecule binding [GO:0050839]
Q14134	TRI29_HUMAN	Tripartite motif-containing protein 29 (Ataxia telangiectasia group D-associated protein)	TRIM29 ATDC	8.7219	15.8821	3.42703	-0.692395	0.000851349	0.022277	0.4063	innate immune response [GO:0045087]; negative regulation of protein localization to nucleus [GO:1900181]; negative regulation of transcription by RNA polymerase II [GO:0000122]	adherens junction [GO:0005912]; lysosome [GO:0005764]	cadherin binding involved in cell-cell adhesion [GO:0098641]; identical protein binding [GO:0042802]; p53 binding [GO:0002039]; zinc ion binding [GO:0008270]
Q15056	IF4H_HUMAN	Eukaryotic translation initiation factor 4H (eIF-4H) (Williams-Beuren syndrome chromosomal region 1 protein)	EIF4H KIAA0038 WBSCR1 WSCR1	12.2514	13.1689	5.14639	5.05853	1.12777e-06	0.000431871	0.00601	developmental growth [GO:0048589]; eukaryotic translation initiation factor 4F complex assembly [GO:0097010]; formation of translation preinitiation complex [GO:0001731]; regulation of translational initiation [GO:0006446]; sexual reproduction [GO:0019953]; translational initiation [GO:0006413]; viral process [GO:0016032]	cytosol [GO:0005829]; eukaryotic translation initiation factor 4F complex [GO:0016281]; membrane [GO:0016020]; perinuclear region of cytoplasm [GO:0048471]	cadherin binding [GO:0045296]; ribosomal small subunit binding [GO:0043024]; RNA binding [GO:0003723]; RNA strand annealing activity [GO:0033592]; RNA strand-exchange activity [GO:0034057]; translation factor activity, RNA binding [GO:0008135]; translation initiation factor activity [GO:0003743]
Q6KB66	K2C80_HUMAN	Keratin, type II cytoskeletal 80 (Cytokeratin-80) (CK-80) (Keratin-80) (K80) (Type-II keratin Kb20)	KRT80 KB20	6.04696	5.8918	3.01207	-1.81415	0.00320087	0.0461342	0.118432	cornification [GO:0070268]; keratinization [GO:0031424]	cytoplasm [GO:0005737]; cytosol [GO:0005829]; intermediate filament [GO:0005882]; intermediate filament cytoskeleton [GO:0045111]; keratin filament [GO:0045095]
Q6ZRV2	FA83H_HUMAN	Protein FAM83H	FAM83H	11.8798	7.73924	6.34346	9.85144	4.76304e-09	6.31579e-06	0.000593	biomineral tissue development [GO:0031214]; intermediate filament cytoskeleton organization [GO:0045104]; positive regulation of cell migration [GO:0030335]; protein localization to cytoskeleton [GO:0044380]; signal transduction [GO:0007165]	cytoplasm [GO:0005737]; cytoskeleton [GO:0005856]	keratin filament binding [GO:1990254]; protein kinase binding [GO:0019901]
Q8WUF5	IASPP_HUMAN	RelA-associated inhibitor (Inhibitor of ASPP protein) (Protein iASPP) (NFkB-interacting protein 1) (PPP1R13B-like protein)	PPP1R13L IASPP NKIP1 PPP1R13BL RAI	6.579	5.10792	3.52999	-0.396113	0.000601878	0.0185602	0.13684	apoptotic process [GO:0006915]; cardiac muscle contraction [GO:0060048]; cardiac right ventricle morphogenesis [GO:0003215]; embryonic camera-type eye development [GO:0031076]; hair cycle [GO:0042633]; multicellular organismal homeostasis [GO:0048871]; multicellular organism growth [GO:0035264]; negative regulation of transcription by RNA polymerase II [GO:0000122]; positive regulation of cell di…	cell junction [GO:0030054]; cytosol [GO:0005829]; intercellular bridge [GO:0045171]; nucleoplasm [GO:0005654]; nucleus [GO:0005634]	cadherin binding [GO:0045296]; identical protein binding [GO:0042802]; transcription corepressor activity [GO:0003714]; transcription factor binding [GO:0008134]
Q92597	NDRG1_HUMAN	Protein NDRG1 (Differentiation-related gene 1 protein) (DRG-1) (N-myc downstream-regulated gene 1 protein) (Nickel-specific induction protein Cap43) (Reducing agents and tunicamycin-responsive protein) (RTP) (Rit42)	NDRG1 CAP43 DRG1 RTP	10.878	16.3888	4.25212	1.86609	4.37462e-05	0.00414339	0.04507	cellular response to hypoxia [GO:0071456]; DNA damage response, signal transduction by p53 class mediator [GO:0030330]; mast cell activation [GO:0045576]; negative regulation of cell population proliferation [GO:0008285]; peripheral nervous system myelin maintenance [GO:0032287]; postsynapse organization [GO:0099173]; regulation of apoptotic process [GO:0042981]; response to metal ion [GO:0010038…	adherens junction [GO:0005912]; centrosome [GO:0005813]; cytoplasm [GO:0005737]; cytosol [GO:0005829]; extracellular exosome [GO:0070062]; glutamatergic synapse [GO:0098978]; microtubule [GO:0005874]; microtubule cytoskeleton [GO:0015630]; nucleus [GO:0005634]; perinuclear region of cytoplasm [GO:0048471]; plasma membrane [GO:0005886]; recycling endosome membrane [GO:0055038]	cadherin binding [GO:0045296]; gamma-tubulin binding [GO:0043015]; microtubule binding [GO:0008017]; small GTPase binding [GO:0031267]
Q96FS1	Q96FS1_HUMAN	CTNND1 protein (Fragment)	CTNND1	8.56042	6.07544	4.54818	2.87917	1.36555e-05	0.00226339	0.0155	cell-cell adhesion [GO:0098609]	cell junction [GO:0030054]	cadherin binding [GO:0045296]
Q9BQI0	AIF1L_HUMAN	Allograft inflammatory factor 1-like (Ionized calcium-binding adapter molecule 2)	AIF1L C9orf58 IBA2 UNQ672/PRO1306	8.96611	8.99398	3.84065	0.538726	0.00020274	0.00938475	0.01467	actin filament bundle assembly [GO:0051017]; ruffle assembly [GO:0097178]	actin cytoskeleton [GO:0015629]; cytoplasm [GO:0005737]; extracellular exosome [GO:0070062]; focal adhesion [GO:0005925]; protein-containing complex [GO:0032991]; ruffle membrane [GO:0032587]	actin filament binding [GO:0051015]; calcium ion binding [GO:0005509]
Q9C0C2	TB182_HUMAN	182 kDa tankyrase-1-binding protein	TNKS1BP1 KIAA1741 TAB182	7.43636	8.5814	3.43027	-0.683172	0.000842195	0.022277	0.30773	cellular response to ionizing radiation [GO:0071479]; DNA damage response, signal transduction by p53 class mediator resulting in cell cycle arrest [GO:0006977]; double-strand break repair [GO:0006302]; nuclear-transcribed mRNA poly(A) tail shortening [GO:0000289]; positive regulation of peptidyl-serine phosphorylation [GO:0033138]; positive regulation of peptidyl-threonine phosphorylation [GO:00…	actin cytoskeleton [GO:0015629]; adherens junction [GO:0005912]; CCR4-NOT complex [GO:0030014]; cytoplasm [GO:0005737]; cytosol [GO:0005829]; heterochromatin [GO:0000792]; nucleus [GO:0005634]; plasma membrane [GO:0005886]	ankyrin repeat binding [GO:0071532]; cadherin binding [GO:0045296]; enzyme binding [GO:0019899]; protein-containing complex binding [GO:0044877]
Q9NQ38	ISK5_HUMAN	Serine protease inhibitor Kazal-type 5 (Lympho-epithelial Kazal-type-related inhibitor) (LEKTI) [Cleaved into: Hemofiltrate peptide HF6478; Hemofiltrate peptide HF7665]	SPINK5	1.35851	30.5002	3.85574	0.585669	0.000191999	0.00938475	0.00927	cell differentiation [GO:0030154]; central nervous system development [GO:0007417]; cornification [GO:0070268]; epidermal cell differentiation [GO:0009913]; epithelial cell differentiation [GO:0030855]; extracellular matrix organization [GO:0030198]; hair cell differentiation [GO:0035315]; multicellular organism development [GO:0007275]; negative regulation of angiogenesis [GO:0016525]; negative …	cell cortex [GO:0005938]; cytoplasm [GO:0005737]; cytosol [GO:0005829]; endoplasmic reticulum [GO:0005783]; endoplasmic reticulum membrane [GO:0005789]; epidermal lamellar body [GO:0097209]; extracellular region [GO:0005576]; intracellular membrane-bounded organelle [GO:0043231]; perinuclear region of cytoplasm [GO:0048471]	serine-type endopeptidase inhibitor activity [GO:0004867]
Q9UJU6	DBNL_HUMAN	Drebrin-like protein (Cervical SH3P7) (Cervical mucin-associated protein) (Drebrin-F) (HPK1-interacting protein of 55 kDa) (HIP-55) (SH3 domain-containing protein 7)	DBNL CMAP SH3P7 PP5423	9.27142	15.7334	3.6374	-0.0797646	0.000416086	0.0149116	0.2891	activation of JUN kinase activity [GO:0007257]; adaptive immune response [GO:0002250]; neuron projection morphogenesis [GO:0048812]; neutrophil degranulation [GO:0043312]; podosome assembly [GO:0071800]; positive regulation of axon extension [GO:0045773]; positive regulation of dendritic spine morphogenesis [GO:0061003]; postsynaptic actin cytoskeleton organization [GO:0098974]; Rac protein signa…	cell cortex [GO:0005938]; clathrin-coated vesicle membrane [GO:0030665]; cortical actin cytoskeleton [GO:0030864]; cytoplasm [GO:0005737]; cytosol [GO:0005829]; dendrite [GO:0030425]; early endosome [GO:0005769]; extracellular exosome [GO:0070062]; extracellular region [GO:0005576]; ficolin-1-rich granule lumen [GO:1904813]; Golgi membrane [GO:0000139]; lamellipodium [GO:0030027]; perikaryon [GO:…	actin binding [GO:0003779]; actin filament binding [GO:0051015]; cadherin binding [GO:0045296]; enzyme activator activity [GO:0008047]; protein C-terminus binding [GO:0008022]; protein domain specific binding [GO:0019904]
1 Adjusted for Lactobacillus relative abundance, sexually transmitted infection status, contraceptive use, prostate specific antigen detection

## Sheet: Supplementary Table 3
Supplementary Table 3: Genes differentially expressed by L-LA, D-LA and HCL treatment of Ect cells*
* As compared to untreated cells. Filtered on Log2Fold change (Log2FC) of > 0.5 and false discovery rate (FDR) < 0.05.
L-LA					D-LA					HCL
Gene	Log2FC	FDR	P value		Gene	Log2FC	FDR	P value		Gene	Log2FC	FDR	P value
FBLIM1	0.77938	6.09969e-09	4.30343e-13		HSPA6	4.19381	4.21207e-09	2.97168e-13		HSPA6	2.70954	0.000108534	7.65728e-09
EDN1	1.36476	1.23107e-08	2.60562e-12		SH3RF1	1.05167	5.99944e-08	8.46542e-12
HSPA6	3.84774	1.23107e-08	2.44207e-12		CLDN4	1.63053	1.19106e-07	2.52094e-11
GLIPR1	1.58183	5.67195e-08	1.60066e-11		GLIPR1	1.51868	1.25444e-07	3.54013e-11
TMCC3	1.33187	1.98665e-07	7.00809e-11		EHF	-0.78876	2.61336e-07	9.21887e-11
SH3RF1	0.935058	2.80641e-07	1.18798e-10		FBLIM1	0.597078	4.62646e-07	1.95843e-10
CLDN4	1.46951	3.88897e-07	1.98047e-10		EDN1	1.08478	8.15159e-07	4.60087e-10
EHF	-0.76189	3.88897e-07	2.19499e-10		CDKL5	1.03753	8.15159e-07	4.27519e-10
CDKL5	1.07376	4.19986e-07	2.66677e-10		PIAS1	-0.693734	1.38801e-06	8.81337e-10
HPCAL1	0.689127	1.29866e-06	9.16226e-10		DNAJA4	1.63261	1.69419e-06	1.20631e-09
IRF6	0.68293	1.59606e-06	1.46386e-09		HAP1	1.51405	1.69419e-06	1.31481e-09
CSRP1	0.574062	1.59606e-06	1.35242e-09		KRT34	1.50521	2.38792e-06	2.02167e-09
CDC42EP2	0.573996	1.59606e-06	1.36545e-09		CDK7	0.745607	2.71126e-06	2.67798e-09
FEM1B	0.661153	1.68059e-06	1.75037e-09		CLCF1	1.65649	2.71126e-06	2.54507e-09
ETS1	0.903844	1.68059e-06	1.77853e-09		HPCAL1	0.641298	3.14214e-06	3.32525e-09
PLAUR	1.86245	2.50067e-06	2.82282e-09		CSRP1	0.54656	3.29784e-06	3.90764e-09
STK38L	0.708395	2.74611e-06	3.3094e-09		TMCC3	1.10295	3.29784e-06	3.95536e-09
SPOCD1	2.27117	2.74611e-06	3.48737e-09		PLAUR	1.79988	4.52314e-06	5.74408e-09
ARTN	0.891202	4.24809e-06	5.69449e-09		STK38L	0.677137	5.67747e-06	7.61055e-09
PTPN12	0.733352	5.05373e-06	7.42817e-09		VTCN1	-1.72134	1.55252e-05	2.19066e-08
CYP26B1	1.49657	5.05373e-06	7.48754e-09		ANGPTL4	1.09857	1.91763e-05	2.84114e-08
LOX	1.29434	5.7335e-06	8.89918e-09		SEMA7A	1.42498	2.00682e-05	3.14615e-08
ARHGEF2	0.828293	8.00727e-06	1.29933e-08		SPOCD1	2.03223	2.00682e-05	3.25644e-08
ANGPTL4	1.1367	8.97098e-06	1.519e-08		C4orf54	3.71058	2.18657e-05	3.70238e-08
DUSP4	1.02758	9.39991e-06	1.72427e-08		EML2	0.637672	2.34618e-05	4.13817e-08
PIAS1	-0.59345	1.21237e-05	2.36205e-08		SLC29A3	-0.919275	2.47268e-05	4.53574e-08
CDKN1B	-0.564244	1.21237e-05	2.39497e-08		ARTN	0.792557	2.57539e-05	4.90586e-08
VAV3	-1.18722	1.23012e-05	2.51682e-08		NFE2L2	-0.517685	2.9747e-05	5.87637e-08
CDK7	0.6688	1.24716e-05	2.63967e-08		LIN54	-0.585274	3.20348e-05	6.55431e-08
CDCP1	0.676168	2.30236e-05	5.03551e-08		RHOB	0.696957	3.50432e-05	7.41707e-08
CDK5R1	1.19518	2.6598e-05	6.19257e-08		CTGF	1.35504	3.54699e-05	7.75764e-08
KRT34	1.29516	2.6598e-05	6.10537e-08		SYNPO2L	2.43357	4.18269e-05	9.73818e-08
SOX9	1.38973	2.72869e-05	6.65174e-08		CDKN1B	-0.507299	4.57923e-05	1.09845e-07
TRIB1	0.561652	2.72869e-05	6.73797e-08		DUSP4	0.924877	4.73014e-05	1.26814e-07
GRHL3	0.836816	2.93588e-05	7.66385e-08		IRF6	0.537773	5.74487e-05	1.58071e-07
GADD45A	0.748569	3.41855e-05	9.16501e-08		HSPA1L	1.66261	7.29052e-05	2.05743e-07
CLCF1	1.37755	4.29973e-05	1.18308e-07		FEM1B	0.514272	7.70658e-05	2.28359e-07
LGALSL	0.705452	4.91248e-05	1.38634e-07		GRAMD2B	0.528569	7.70658e-05	2.26758e-07
HS3ST1	1.10302	5.16725e-05	1.53115e-07		CIPC	-0.742796	8.097e-05	2.51353e-07
BCL6	-0.938807	6.04907e-05	1.8778e-07		S1PR3	0.979157	8.097e-05	2.49879e-07
PRNP	0.720297	6.19275e-05	1.96609e-07		GPATCH11	-0.50493	8.59881e-05	2.72997e-07
DCUN1D3	1.20809	7.07643e-05	2.5174e-07		ETS1	0.693749	8.84772e-05	2.87142e-07
HAP1	1.16508	7.07643e-05	2.43699e-07		HSPA1A	1.5276	8.93602e-05	2.96312e-07
MRPS17	0.683738	7.07643e-05	2.54007e-07		HSPA1B	1.28552	8.94918e-05	3.06689e-07
S1PR3	0.988819	7.07643e-05	2.53845e-07		SOX9	1.27748	8.94918e-05	3.11507e-07
GULP1	-0.967998	7.07643e-05	2.5462e-07		CYP1A1	-1.55892	0.000110032	4.11435e-07
JMY	-0.846598	7.09757e-05	2.62278e-07		FERMT2	0.884091	0.000110032	4.03885e-07
VTCN1	-1.49835	7.09757e-05	2.65395e-07		RGS2	1.0086	0.00011512	4.38583e-07
TNFRSF21	0.6234	7.20834e-05	2.74623e-07		PC	0.694339	0.000119331	4.71154e-07
MICAL2	0.582341	7.31399e-05	2.88745e-07		CXCL8	2.03601	0.000119331	4.71466e-07
UHRF1BP1	-0.606073	7.31399e-05	2.88968e-07		VAV3	-0.980611	0.000119618	4.81037e-07
SLC29A3	-0.843076	8.02295e-05	3.22639e-07		CLDN1	1.167	0.000122099	5.14546e-07
TRIM2	-1.16304	8.74824e-05	3.57978e-07		SEMA3A	1.11973	0.000129236	5.56186e-07
NR1D2	-0.882575	9.26881e-05	3.85819e-07		AP5B1	0.624538	0.000147359	6.54975e-07
QRICH2	1.20139	9.69113e-05	4.11161e-07		GJA5	-1.61003	0.000150273	6.78527e-07
EXT1	0.581327	0.00010617	4.71898e-07		S1PR5	-0.786535	0.000172125	8.17787e-07
CYP1A1	-1.59049	0.00010617	4.69972e-07		ADPRH	-0.792853	0.000172125	8.03258e-07
RGS2	1.00124	0.000112824	5.17397e-07		DHRS2	-0.956525	0.000172125	8.25771e-07
PPP2R5B	0.507087	0.000112824	5.17128e-07		KRT4	-2.52425	0.000176186	8.63994e-07
LIN54	-0.527461	0.000115465	5.37653e-07		PER3	-0.641958	0.000176186	8.94977e-07
LAMB3	0.769149	0.000130883	6.27912e-07		RASSF10	0.920192	0.000227404	1.17119e-06
SEMA3A	1.12323	0.000130883	6.20978e-07		USP54	-0.616911	0.0002477	1.2932e-06
DHRS2	-1.00961	0.000137414	6.88332e-07		JMY	-0.738055	0.00025933	1.37221e-06
IER3	0.751234	0.00013839	7.12745e-07		ZFAND2A	1.00651	0.000261433	1.40179e-06
FERMT2	0.86778	0.00013839	7.04212e-07		KLHL26	0.89356	0.000294276	1.61941e-06
DNAJA4	1.18723	0.000152694	8.10464e-07		BAG3	0.515569	0.000319729	1.78204e-06
CLDN1	1.12134	0.000161286	8.87563e-07		LIPH	0.994583	0.000342407	1.93259e-06
ST3GAL5	1.25064	0.000161861	9.02147e-07		MAP3K14	0.553532	0.000396127	2.29169e-06
LCN2	-1.39644	0.000174609	9.85518e-07		PAM16	0.615084	0.000396127	2.26754e-06
ACTG1	0.600729	0.000206953	1.22647e-06		PTPN12	0.532889	0.000398824	2.33543e-06
GSAP	0.827708	0.000208389	1.24969e-06		ABHD11	0.718479	0.00040841	2.42038e-06
OVOL1	1.1266	0.000216654	1.31454e-06		KDM6A	0.967493	0.000408444	2.46441e-06
ST14	0.556857	0.000218859	1.39977e-06		CORO2A	0.585252	0.000408444	2.49902e-06
FOSL1	0.898624	0.000218859	1.40512e-06		MAP2	-0.567568	0.000446871	2.81346e-06
MAST4	0.818996	0.000218859	1.35972e-06		USP11	0.794719	0.000446871	2.83748e-06
SPHK1	0.715615	0.000218859	1.39073e-06		RASA2	0.594258	0.000482763	3.16756e-06
MET	0.563278	0.000225692	1.46491e-06		STAG1	-0.505211	0.00048477	3.21493e-06
ZYX	0.642145	0.000236871	1.55418e-06		CDCP1	0.531373	0.00049166	3.29531e-06
KLF9	-0.879615	0.000241204	1.60405e-06		CDK5R1	0.949299	0.000496904	3.36552e-06
SH2D4A	-0.615583	0.000241204	1.61665e-06		KCTD1	-0.571438	0.000504699	3.45391e-06
SEMA7A	1.15303	0.00026211	1.84132e-06		ARHGEF2	0.599522	0.000556965	3.96878e-06
PC	0.652951	0.00026211	1.84039e-06		PGF	1.40131	0.000577912	4.15881e-06
SYNPO2L	2.1273	0.00026211	1.84923e-06		GADD45A	0.594469	0.000586358	4.57345e-06
TMEM200A	1.45163	0.000262899	1.87334e-06		EXT1	0.506689	0.000586358	4.5902e-06
RND3	0.609776	0.000274218	1.99162e-06		ALDH1B1	0.636393	0.000586358	4.50458e-06
NFIL3	-0.614585	0.000274218	1.99269e-06		FAM83B	-0.723164	0.000586358	4.43384e-06
KRT75	1.00116	0.000287748	2.12122e-06		FIGN	-1.02313	0.000586358	4.29906e-06
BAG3	0.507603	0.000288445	2.15713e-06		ABHD16B	1.12878	0.000586358	4.59191e-06
FST	1.1453	0.000289902	2.20163e-06		HIC1	0.795362	0.000586358	4.4347e-06
RASA2	0.617498	0.00029467	2.26606e-06		LOX	0.914063	0.000586527	4.63461e-06
VASP	0.503705	0.000294719	2.37943e-06		DENND3	0.771131	0.000620717	4.94857e-06
RNF144B	-0.657166	0.000294719	2.43603e-06		NECTIN2	0.507586	0.000626394	5.16104e-06
ZNF750	1.03683	0.000294719	2.42175e-06		IFNLR1	0.591914	0.000626394	5.12736e-06
RHOB	0.569231	0.000294719	2.45357e-06		KANK1	-0.524409	0.000647823	5.57602e-06
LIPH	0.988312	0.000294719	2.31724e-06		FBXL18	0.696244	0.000647823	5.5178e-06
PTK2B	0.804854	0.000294719	2.35808e-06		SCRN2	0.581461	0.000647823	5.5713e-06
ZNF488	-0.664467	0.000294719	2.41642e-06		GAREM1	-0.672239	0.000647823	5.51932e-06
CLIC5	-2.54952	0.000294719	2.38344e-06		COL2A1	2.05343	0.000667283	5.83767e-06
GJA5	-1.5171	0.000312839	2.62649e-06		HS3ST1	0.887813	0.000669312	5.90264e-06
SERPINB2	1.17705	0.000317943	2.69177e-06		PTPN1	0.551094	0.000682311	6.10523e-06
ITGA5	0.894198	0.000322457	2.75274e-06		CYP26B1	1.0448	0.000682311	6.11355e-06
ELF4	0.589616	0.00033895	2.91745e-06		ARC	2.03886	0.00071736	6.47821e-06
NECTIN2	0.529938	0.000348133	3.04562e-06		NGF	2.2858	0.000731536	6.65783e-06
DDX28	0.582879	0.000348133	3.03079e-06		MRPS17	0.555418	0.000770812	7.12405e-06
ALDH1B1	0.651265	0.000348575	3.07407e-06		CALHM5	-2.69579	0.000780605	7.32471e-06
IL36G	2.14979	0.000395046	3.56751e-06		COL26A1	3.11504	0.000780605	7.30207e-06
C4orf54	2.98195	0.000395046	3.56359e-06		TNFAIP3	0.946572	0.000890186	8.41576e-06
TGFB3	1.26749	0.000411145	3.7419e-06		ITGA5	0.82904	0.000966415	9.2046e-06
G0S2	1.09123	0.000424225	3.89088e-06		EGR4	3.28092	0.00100215	9.61565e-06
ACTB	0.55207	0.000436543	4.0864e-06		SOD3	-1.32411	0.00100647	9.72807e-06
F3	0.940019	0.000452831	4.31298e-06		STON2	-0.656225	0.00101789	9.9103e-06
FBXL18	0.711181	0.000459562	4.40951e-06		SH3TC2	-0.573043	0.00106553	1.06748e-05
FAM160B1	-0.601291	0.000461803	4.46359e-06		OVOL1	0.979567	0.00109476	1.15759e-05
VCL	0.702163	0.000475153	4.62615e-06		TRIM2	-0.880236	0.00109476	1.15622e-05
IFFO2	0.962246	0.000488147	4.81924e-06		PANK1	-0.558363	0.00109476	1.14768e-05
SESN3	-0.826359	0.000488147	4.85498e-06		FBXL14	0.920928	0.00109476	1.15855e-05
FAM214A	-0.737656	0.000488147	4.85599e-06		FHL2	0.94957	0.00110414	1.17627e-05
TICAM1	0.526164	0.000536605	5.51314e-06		ACSBG1	-1.37321	0.00116407	1.24833e-05
JADE1	-0.567416	0.000536605	5.52733e-06		SCEL	-1.18628	0.00117134	1.2644e-05
CXCL8	1.77673	0.000566594	5.87621e-06		CLIC5	-2.10897	0.00118019	1.29059e-05
OSMR	0.532502	0.00061548	6.47673e-06		KRTAP1-5	2.65695	0.00118019	1.28879e-05
SH3TC2	-0.603822	0.000619743	6.60964e-06		MFSD12	0.580731	0.00120545	1.33536e-05
HBEGF	0.91465	0.000668775	7.21904e-06		DCUN1D3	0.948234	0.00120545	1.33445e-05
PLK2	0.534059	0.000750243	8.46895e-06		BACH2	0.79658	0.00127018	1.43381e-05
SPRY4	0.537397	0.000750243	8.44246e-06		TMEM200A	1.26997	0.00127018	1.43157e-05
B4GALT4	0.544642	0.000769089	8.79021e-06		TNFSF18	2.02337	0.00143972	1.64551e-05
PALMD	1.25805	0.000769089	8.77737e-06		MEGF9	-0.574666	0.00145299	1.70169e-05
PTPN1	0.532544	0.000802361	9.39692e-06		EPB41L4A	-1.18545	0.00145299	1.68351e-05
EHD4	0.536089	0.000802361	9.34631e-06		NR1D2	-0.649506	0.00145603	1.71551e-05
TNFAIP3	0.938891	0.000802361	9.30677e-06		DDN	-0.657293	0.00153512	1.85202e-05
TGFB1I1	0.628833	0.000810825	9.55325e-06		TMEM158	0.959796	0.0016001	1.9417e-05
CORO2A	0.535202	0.000874219	1.04235e-05		SLC35G2	0.625951	0.00160692	1.96132e-05
FLVCR2	-1.00658	0.000875895	1.05053e-05		HAS3	0.751432	0.00160707	1.98195e-05
GAREM1	-0.655028	0.000909566	1.10375e-05		ADGRF4	0.588072	0.00161436	2.03245e-05
PCYT1A	0.538665	0.00106889	1.32725e-05		APCDD1	-1.71197	0.00162243	2.07182e-05
HAS3	0.77134	0.00111991	1.40022e-05		CARD10	0.752801	0.00175011	2.24722e-05
SHC4	1.794	0.00119892	1.51409e-05		RND3	0.519559	0.00175429	2.26496e-05
FOXN2	0.601178	0.00120875	1.53503e-05		GOPC	-0.503032	0.00194872	2.59848e-05
LHFPL2	0.567951	0.0012268	1.5666e-05		TCEANC2	-0.531587	0.00195785	2.63595e-05
ZBED5	-0.51679	0.00124658	1.61826e-05		MTM1	0.533978	0.00197643	2.69121e-05
MAMLD1	0.638368	0.00125075	1.63249e-05		LHFPL2	0.539227	0.0020667	2.9016e-05
KLF5	0.529771	0.00126583	1.66111e-05		LAMB3	0.59852	0.0020905	2.96451e-05
HSPA1B	0.980659	0.00133523	1.77597e-05		KIAA1755	2.37767	0.00211761	3.0179e-05
CTGF	0.998205	0.00133523	1.78044e-05		KCNN4	0.700208	0.00216538	3.14708e-05
ELL2	0.744414	0.00137122	1.83809e-05		CARD6	-0.663203	0.0021814	3.18576e-05
TNXB	-0.819973	0.00153595	2.09142e-05		PPP1R16B	-1.48123	0.00218846	3.22695e-05
METRNL	0.702098	0.00155103	2.13384e-05		CSRP2	0.806966	0.00222669	3.34616e-05
PTGS1	0.589419	0.00155906	2.15589e-05		NR4A1	1.18372	0.00224348	3.38722e-05
IFNLR1	0.544266	0.00161589	2.24587e-05		FBXO2	0.504762	0.00235395	3.58722e-05
ZNF408	0.509742	0.00163503	2.28401e-05		SLC25A25	0.776453	0.00239391	3.73012e-05
CARD10	0.756008	0.00166902	2.34403e-05		NUAK2	1.00445	0.00239391	3.77221e-05
STEAP4	-1.05511	0.00176901	2.5211e-05		FOXN2	0.559838	0.00239391	3.76688e-05
JARID2	0.731649	0.00183818	2.64561e-05		STEAP4	-1.00025	0.00247825	3.93401e-05
NOS3	-1.41451	0.0018592	2.68898e-05		SHC4	1.66405	0.00251054	4.00298e-05
NET1	0.513044	0.0019907	2.89322e-05		MFNG	1.87213	0.00251624	4.0464e-05
DUS2	0.506906	0.0019947	2.91309e-05		ASPHD1	0.710264	0.00251985	4.08727e-05
HSPA1A	1.11059	0.00210531	3.16375e-05		BHLHE40	-0.654967	0.0026757	4.39846e-05
ERP27	-0.976706	0.00210531	3.13452e-05		FOCAD	0.553321	0.00273717	4.53244e-05
TLR1	-1.30204	0.00210531	3.12965e-05		DNAH3	-1.21651	0.00273717	4.53813e-05
MGAM	1.68588	0.00210531	3.16275e-05		NAALADL2	-1.73829	0.00277508	4.62057e-05
S1PR5	-0.618649	0.00220957	3.33602e-05		KMT2E	-0.510703	0.00277656	4.64262e-05
TMEM158	0.931627	0.00244192	3.75574e-05		AHR	-0.601783	0.00281634	4.72901e-05
NAV2	-0.63605	0.00245743	3.79693e-05		KLF2	1.64962	0.00282058	4.77593e-05
SERPINE1	1.1417	0.00251291	3.9518e-05		RNF144B	-0.519575	0.0028371	4.85133e-05
ZFYVE9	0.531775	0.00260398	4.13359e-05		CYP4B1	-0.977461	0.0028371	4.86394e-05
CALD1	0.565216	0.00279136	4.49012e-05		FLVCR2	-0.843278	0.00286748	4.93627e-05
ALDH1A3	0.586429	0.00290711	4.69683e-05		ULBP2	0.547843	0.00295211	5.12361e-05
HSPA1L	1.24254	0.00293214	4.75795e-05		PARP16	-0.57271	0.00295625	5.15164e-05
TACSTD2	0.604186	0.00308892	5.12132e-05		ZNF763	1.37386	0.00295655	5.17302e-05
ARID5B	-0.542008	0.00308892	5.10887e-05		ITGA2	0.810056	0.00296999	5.25382e-05
KDM6A	0.780324	0.00311168	5.18101e-05		GPSM2	-0.713198	0.00296999	5.24311e-05
RASSF10	0.735077	0.00320888	5.38813e-05		KRTAP2-3	1.12341	0.00301403	5.35865e-05
SEMA4B	0.677629	0.00334115	5.6338e-05		PSG5	-1.49828	0.00321444	5.783e-05
SLFN5	0.784066	0.00335587	5.68229e-05		LCN10	3.27538	0.00321503	5.82455e-05
FRAT2	-0.518342	0.00336118	5.71501e-05		MPRIP	-0.542333	0.00323146	5.90482e-05
BACH2	0.732209	0.003414	5.8289e-05		GRHL3	0.546761	0.00336354	6.19362e-05
ANTXR2	0.803815	0.003499	5.99871e-05		LAMA4	-0.911128	0.00336549	6.22097e-05
HIVEP2	-0.509328	0.00354585	6.10405e-05		KLF9	-0.658823	0.00341226	6.35555e-05
IL33	2.87711	0.00356824	6.16777e-05		CCR4	-1.47943	0.00353422	6.72323e-05
ITGA2	0.794577	0.0036769	6.38152e-05		F2RL1	0.592018	0.00370283	7.18413e-05
AKAP12	1.41348	0.00409375	7.33606e-05		VCL	0.576035	0.00383458	7.58712e-05
PTPRR	-1.18953	0.00418051	7.56324e-05		SESN1	-0.65724	0.00398839	8.16025e-05
FAM131B	1.36166	0.00419448	7.69412e-05		GBP1	1.10518	0.00400921	8.33755e-05
ERN2	2.10391	0.00428751	7.89501e-05		SASS6	-0.61482	0.00400921	8.37331e-05
GBP1	1.11378	0.00431315	7.97266e-05		PTGER4	0.769743	0.00400921	8.33761e-05
SLC17A5	-0.507546	0.00432525	8.08657e-05		ULBP1	1.34127	0.00401328	8.4943e-05
INHBA	0.545111	0.00439247	8.27422e-05		BCL6	-0.578941	0.00413133	8.90635e-05
RCAN1	0.844796	0.0044613	8.46683e-05		RNF122	1.07528	0.00413133	8.94821e-05
PTHLH	1.003	0.00448503	8.54351e-05		RAB33A	1.31152	0.00417826	9.13828e-05
ANXA9	-0.694615	0.00455799	8.83883e-05		AKAP12	1.37533	0.004463	0.000100036
FOXL1	0.777997	0.00455799	8.84328e-05		TIGD2	-0.545922	0.004463	0.000100444
TAGAP	1.51496	0.00468789	9.16146e-05		VWF	-1.06016	0.004463	0.000100383
ANK3	-0.600564	0.00469277	9.20412e-05		PLEKHG1	-1.46991	0.0045545	0.000103146
ACSBG1	-1.17994	0.00483771	9.53184e-05		IL1RL1	2.08513	0.00460871	0.000105024
PRDM1	1.31474	0.00499123	9.93035e-05		OR2A7	1.10741	0.00460871	0.000104812
CYP4B1	-0.955165	0.00503933	0.000101327		RAB43	0.736113	0.00464775	0.000107102
PLCE1	-0.709531	0.00503933	0.000100677		P2RX2	-1.78706	0.00480724	0.000111922
EXOC6	-0.534024	0.00503933	0.000101241		LCN2	-0.961204	0.00482006	0.000112561
ALPP	-1.0269	0.00524829	0.000105899		ERN2	2.02377	0.00482498	0.000113016
ZFAND2A	0.769246	0.00531427	0.00010873		ERVV-2	-2.70669	0.00484124	0.000113739
AMIGO1	-0.62294	0.00531427	0.000108605		HBEGF	0.745168	0.00485131	0.000114317
ZGRF1	-0.582482	0.00536222	0.000110468		G0S2	0.854257	0.0048591	0.000114844
AHR	-0.558859	0.00595972	0.000126561		GSAP	0.604801	0.00488023	0.000116032
DENND3	0.62913	0.00595972	0.00012624		TLR1	-1.08658	0.00488286	0.000116645
SERPINE2	0.779247	0.00596519	0.000127916		HSPA5	0.599752	0.00492032	0.000118889
DOPEY1	-0.584793	0.00596519	0.000127138		EREG	0.791746	0.00492032	0.00011931
SLIT1	-1.28369	0.00596519	0.00012794		IL11	1.23169	0.00502875	0.000122756
TENT5A	-0.697496	0.00597325	0.000128534		ARG2	1.13112	0.00508276	0.000125122
FIGN	-0.796077	0.00603094	0.000130626		RSAD2	-1.57204	0.00572945	0.000143499
ADGRF4	0.512002	0.00622113	0.000137379		ANK3	-0.565213	0.00580488	0.000146617
RRP12	0.531416	0.00624255	0.000138293		SPHK1	0.51375	0.00585924	0.00015047
MYB	-0.748882	0.0062541	0.00013899		PLAC1	1.09499	0.00585924	0.000150138
UAP1L1	0.510686	0.00627659	0.000140383		TMEM63C	-0.708104	0.00600811	0.000155565
MYEOV	-0.826294	0.00627659	0.000140818		S100A7	-1.56918	0.00603754	0.000156753
TPPP3	-1.00337	0.00627659	0.000140509		KIF24	-0.551068	0.00605776	0.000157705
ALPK2	1.47265	0.00638243	0.000144165		SESN3	-0.640532	0.00609101	0.000160683
NAALADL2	-1.6042	0.00638473	0.000145497		CDK19	-0.529773	0.00609101	0.000160685
CCDC15	-0.538446	0.00642935	0.000147874		CCDC121	1.11587	0.00635328	0.000169881
NDRG1	0.828597	0.00647439	0.000149367		TPPP3	-0.94268	0.0064413	0.000172689
MYADM	0.594313	0.00656828	0.00015246		FLG	-2.77811	0.00651566	0.000176062
SLC25A25	0.695375	0.0066879	0.00015618		MB21D2	-0.547776	0.00653222	0.00017697
SCG5	1.46454	0.0066879	0.000155899		PLAT	0.988815	0.00659632	0.000179172
ZFP36L1	0.631427	0.00674003	0.000159957		MYEOV	-0.774028	0.0066529	0.000183056
FLG	-3.12632	0.00674003	0.000160002		PLCE1	-0.646567	0.0066529	0.000182755
LGR4	-0.772441	0.00674003	0.00016025		ERCC2	0.507839	0.00672525	0.000185521
FUT1	0.588462	0.00674003	0.000160106		SERPINB13	-0.748609	0.00700205	0.0001955
AMOT	-1.18534	0.00681173	0.000162916		UPP1	0.538695	0.00712204	0.000199984
ZNF292	-0.500633	0.00716189	0.000172302		CLU	0.98104	0.0072406	0.000203824
ZNF33B	-0.615577	0.00763629	0.000188607		LYPD2	-2.78679	0.00727079	0.000205187
KIF24	-0.558291	0.00763629	0.000189103		ACTG2	2.21659	0.00735449	0.000208586
PHYHIPL	-1.8848	0.00763629	0.000187819		IER3	0.502392	0.00744639	0.000212509
ELFN2	0.788203	0.00778639	0.000193369		AL451123.1	0.861309	0.00744639	0.000212783
EREG	0.761117	0.00794059	0.000198864		CSPP1	-0.650604	0.00766297	0.000222262
CYP27B1	0.539444	0.00794059	0.000198879		IL24	1.86517	0.00766297	0.000223235
COQ8A	-0.59281	0.00803108	0.000203412		TBX4	1.99584	0.00766297	0.000224364
TMEM217	0.985919	0.00803108	0.000203159		FNIP2	-0.737982	0.00774105	0.000227428
DPEP2NB	2.5724	0.008114	0.000206191		MARCKS	-0.57776	0.00785198	0.000232668
KCTD7	-0.763768	0.0082122	0.000210317		KRTAP4-6	1.89305	0.00787908	0.000234027
MTRNR2L8	1.15864	0.00835467	0.000216323		ZNF428	0.519511	0.00802455	0.000241679
KLHL24	-0.956601	0.00852973	0.000221458		MRPL18	0.52443	0.00830226	0.000255382
TNC	0.850488	0.00881812	0.000229567		TNXB	-0.643373	0.00830226	0.000254605
CHST6	-0.774184	0.00924097	0.000243835		FOXJ1	2.91947	0.00830514	0.000256643
ZSCAN2	-0.701226	0.00942995	0.000249487		AC099343.3	1.27419	0.00838546	0.000260308
SLC38A2	-0.534924	0.00965752	0.000258234		FOSL1	0.613299	0.00854566	0.000265959
S100P	-1.04519	0.009688	0.000260415		TACSTD2	0.52918	0.00856927	0.000268432
KRT4	-1.40244	0.00977418	0.000265262		MYADM	0.560212	0.00863197	0.00027405
TIGD2	-0.512706	0.00977418	0.00026549		SLC41A2	0.743025	0.00870744	0.000278903
ITGB6	0.582198	0.00978901	0.000267274		F3	0.685073	0.00872115	0.000281929
LRRC4	1.40474	0.0099659	0.00027351		SORCS2	-1.38878	0.00872115	0.000283035
KIAA1755	2.05712	0.0099777	0.000275242		IL10RA	2.06822	0.00872115	0.000282645
PSG5	-1.31349	0.0100908	0.000279073		GULP1	-0.535516	0.00892541	0.000290293
TGFA	0.51802	0.0105287	0.000295603		ACE2	-0.783092	0.00895639	0.000292605
FRMPD1	-1.92904	0.0111892	0.000317348		METRNL	0.567608	0.00906043	0.000297881
SLC19A2	-0.538728	0.0117137	0.000333874		PLEKHO1	1.14072	0.00906043	0.000297779
C1orf74	0.747899	0.0119471	0.000341369		VGLL1	-0.627072	0.00929738	0.000307639
HIC1	0.595235	0.0120696	0.000349341		DUSP1	0.759313	0.0093324	0.000309456
EPN3	-0.571927	0.0121586	0.000353417		TRPS1	-0.570427	0.00940693	0.000313255
REL	-0.666831	0.0124925	0.00036753		TPRN	0.5117	0.00973146	0.000327582
ATL1	-1.04956	0.0126676	0.000373577		COQ10A	0.610885	0.0100194	0.000343054
XKR8	-0.518722	0.012785	0.000379771		IL33	2.51585	0.0100194	0.000343545
SESN1	-0.586004	0.0130513	0.000389494		SEMA3B	0.666904	0.0104108	0.000362107
LAMC2	0.634181	0.0135935	0.000411891		MYB	-0.656129	0.0104108	0.000361401
PNRC1	-0.66018	0.0135935	0.000412389		CCDC66	-0.55457	0.0105229	0.000369295
PPP1R16B	-1.19576	0.0135935	0.000408046		DLX5	-1.48267	0.0105229	0.000369745
GRAMD1C	-0.785265	0.0136921	0.000416346		MYRFL	-1.61476	0.0105229	0.000370088
DNAH3	-1.0099	0.0138053	0.000420762		ELL2	0.585263	0.0105492	0.000372415
MSN	0.516752	0.0139817	0.000429628		SMPDL3A	-0.569225	0.0105492	0.000373622
IL24	1.79802	0.0139817	0.000427319		CEBPD	-0.591651	0.010557	0.000374641
HIST1H1B	-1.68941	0.0144762	0.000446318		CREB5	0.87968	0.0105874	0.000376469
ERG	1.11081	0.0146158	0.000453842		NHS	0.575481	0.0106719	0.00038173
SASS6	-0.53809	0.015063	0.000473973		LUC7L2	-0.533823	0.0107322	0.000384645
FLG2	-3.74305	0.0154065	0.000486956		PRKCA	0.660683	0.0107749	0.000386934
PNPLA3	-0.633795	0.0154277	0.000489803		MAF	-1.50022	0.0108884	0.000392548
CILP2	0.501448	0.0156432	0.000502162		S100A7A	-1.89568	0.0109757	0.00039865
APBB2	0.646655	0.0162803	0.000527209		MGAM	1.38374	0.0109757	0.000398153
SASH1	-0.917657	0.0162976	0.000528918		S100P	-0.982315	0.0110364	0.000402861
IL1B	1.16326	0.016454	0.000536316		MTUS1	-0.504725	0.0110364	0.000403333
ACTG2	2.08845	0.0165057	0.000539165		CCIN	2.13168	0.0112872	0.000415684
MFNG	1.56542	0.01665	0.000545056		ST3GAL5	0.817151	0.0113979	0.000421369
SLC39A8	-0.502594	0.0173028	0.000573748		CCDC136	0.894369	0.0114331	0.000423763
SYT16	-0.817988	0.0175412	0.000584128		KRT75	0.673522	0.0115176	0.000430693
CITED2	-0.578981	0.0178115	0.000595642		ZNRF2	0.519397	0.0115606	0.000435541
TMEM255A	-1.69574	0.0184431	0.000619368		CENPS-CORT	-1.57734	0.0115618	0.0004364
C22orf39	-0.652935	0.0185952	0.000627098		SERHL2	0.70686	0.0115782	0.000437839
MBNL2	-0.51579	0.0187313	0.000634332		AZIN2	1.36054	0.0115972	0.000439376
TGM2	0.808963	0.0188245	0.000638816		DOC2A	0.9249	0.0116738	0.000444991
ZFC3H1	-0.572133	0.0188471	0.000646092		GPR3	0.795735	0.0116738	0.00044408
APOB	-1.78696	0.0188471	0.000644958		BACH1	-0.532572	0.0116978	0.000450198
VWF	-0.909483	0.0188912	0.00065041		AMIGO1	-0.52393	0.0116978	0.000450612
FHL2	0.67808	0.0190025	0.000656922		SV2A	0.948043	0.0119351	0.00046589
NHS	0.55292	0.0191106	0.000662009		FST	0.760457	0.0120231	0.000471627
CDH3	0.541762	0.0200533	0.000707082		CCM2L	1.82896	0.0121052	0.000475926
MYCL	-0.511129	0.0208943	0.000745908		TAF4B	-0.53052	0.0123039	0.000489209
CHST11	0.628782	0.0211487	0.000765434		FKBPL	-0.526	0.0123039	0.000489809
CSF2RB	-1.19653	0.0218801	0.000798093		NOS3	-1.00172	0.0123039	0.000489516
NACAD	0.757672	0.0219779	0.000809403		MYZAP	-0.697868	0.0124931	0.000501523
AL451123.1	0.782267	0.0219779	0.000809164		DNAJB1	0.568952	0.0124988	0.000502633
RNF122	0.914983	0.0221367	0.000816813		MUC20	-1.16578	0.012625	0.00051038
S100A7A	-1.79843	0.0223638	0.000826769		NR2C2AP	0.595512	0.0126403	0.000511888
TRIM6	-0.660623	0.0226093	0.000842226		RRAD	-0.637988	0.0128776	0.000524979
EPHB3	0.840374	0.0233587	0.000876735		SDSL	0.503809	0.0128776	0.000524396
NUAK2	0.781395	0.0235322	0.000886567		RGS16	0.641275	0.01312	0.000537797
SOCS1	0.660605	0.0235467	0.00088992		IFFO2	0.664627	0.0131587	0.000540311
RAB43	0.621397	0.0241177	0.000918833		FOXL1	0.658262	0.0131702	0.000542319
MTRNR2L12	1.50277	0.0241264	0.000922572		C2orf78	-1.06865	0.0131702	0.000542642
RASEF	-0.531822	0.0246367	0.000952511		FAM131B	1.14695	0.0135253	0.000561089
AC099811.2	4.16153	0.0246367	0.000952251		PNRC1	-0.628939	0.0135386	0.000562595
PLAU	0.779752	0.0249252	0.00096894		TIMP1	0.50711	0.0135496	0.000564011
FAM184A	-0.690673	0.0249255	0.000973256		TSHZ1	-0.593129	0.0137681	0.000579904
MINDY1	-0.562187	0.0251332	0.000984387		NPR1	0.772296	0.0138056	0.000582458
USP11	0.511286	0.0252823	0.00100601		KRTCAP3	0.513824	0.0138144	0.000585752
NGF	1.61476	0.025735	0.00103492		REL	-0.620272	0.0139123	0.000592848
KLHL26	0.570641	0.0260938	0.00105119		EPN3	-0.535842	0.0140207	0.000601237
MNX1	-1.35762	0.0265041	0.00107146		YRDC	0.502802	0.0140207	0.000601044
FNIP2	-0.640814	0.0267386	0.0010866		MCF2L2	1.10064	0.014396	0.000626662
ERCC5	-0.517924	0.0267402	0.0010961		SPRR4	-2.48362	0.0148433	0.000654511
IL1RL1	1.73984	0.0267402	0.00108872		ADAMTS1	0.826401	0.0152927	0.000684041
PER1	-0.595232	0.0268871	0.00110781		EXOSC5	0.500954	0.0154239	0.000692084
TMC7	0.510381	0.0273417	0.00113233		PTPRR	-0.897677	0.0154387	0.000693836
RGS20	0.515116	0.0285148	0.00119237		MAST4	0.509508	0.0155552	0.000708055
GPR161	0.567612	0.0293959	0.00124224		SORBS1	1.30649	0.0155552	0.00070498
RNF43	-0.572795	0.0295526	0.00125516		IL10RB	0.622347	0.0156687	0.000717437
LOR	-3.38222	0.0295526	0.00125497		SLC25A4	0.642352	0.0157147	0.000721765
IFIH1	-0.528012	0.0296466	0.00126334		SERPINE1	0.888487	0.0157771	0.000725743
MCF2L2	1.05294	0.0296716	0.0012665		ID2	1.56725	0.0158634	0.00073531
PCDH19	-1.72656	0.0299897	0.00128219		LRIG3	-0.649378	0.0162515	0.00076365
SOD3	-0.838975	0.0302491	0.0012988		TFPI2	1.64134	0.0164597	0.000778831
P2RX2	-1.38478	0.0302491	0.00129901		SELENOK	0.709198	0.0164597	0.000780368
CCDC121	0.955637	0.0302651	0.00130251		ZNF251	0.521162	0.0164597	0.000779646
DAPP1	0.50238	0.0304828	0.00131441		TCN2	-2.11019	0.0166357	0.000794579
RSAD2	-1.24798	0.0308309	0.00133338		SMAD1	-0.543751	0.0167201	0.000803327
P2RY6	-1.10273	0.0313993	0.00136904		SLC45A4	0.547985	0.0168239	0.000816626
HSPBAP1	-0.64518	0.0316817	0.00139912		LSP1	-0.551107	0.0168264	0.000817934
CCR4	-1.097	0.0316817	0.00139797		ZNF442	0.799039	0.0168343	0.000819503
AL031777.3	-1.15029	0.0320995	0.00142448		ANO4	-0.939334	0.017037	0.00083538
MREG	0.604357	0.0323933	0.00144209		C17orf67	1.06207	0.017118	0.000852723
CASC10	-0.900063	0.0324405	0.00144795		BCL2A1	2.05667	0.017118	0.000847966
PSG2	-2.0104	0.0324405	0.00145258		TGFB3	0.845892	0.0172145	0.000863944
GPSM2	-0.528029	0.0325282	0.00145957		RIMKLB	0.826319	0.0174293	0.000880443
IRF1	-0.708218	0.0325429	0.00146252		PSAPL1	-1.07192	0.0178582	0.000916307
SLC41A2	0.649791	0.0329235	0.00148195		OCLN	0.545097	0.0179183	0.000921575
COL26A1	2.1543	0.0332798	0.00150034		FKBP4	0.548613	0.0179297	0.000927226
EMP1	0.574163	0.0339186	0.00154589		ALDH3B2	-0.754031	0.0179297	0.000923916
VGLL1	-0.540339	0.0339186	0.00154371		TUBD1	-0.568453	0.017959	0.000930006
ARL4A	-0.566378	0.0339186	0.00154514		PCDH7	0.592343	0.0180013	0.000935279
ARFGEF3	-0.656019	0.0346428	0.00160823		PDE2A	0.578435	0.0180074	0.000937593
ADAMTS15	1.14693	0.0346592	0.00161143		AL031777.3	-1.16843	0.0181671	0.000948472
SEC14L5	-1.23668	0.034931	0.00162653		RCAN1	0.679832	0.0181958	0.000951258
MMP3	0.859152	0.035219	0.00164405		ZFP57	1.13626	0.0181996	0.000953533
EGR4	2.27159	0.0363787	0.00170934		TRPT1	0.60701	0.0182841	0.000961032
TAGLN	0.985601	0.0367305	0.00174401		VGLL3	0.568518	0.018286	0.000964406
MPIG6B	-0.826388	0.0374055	0.00179453		ALPK2	1.23953	0.018286	0.000965
SLC27A2	-0.509794	0.0378559	0.00182683		DUOX2	-0.703951	0.018617	0.000991662
TP73	-0.771303	0.0378823	0.00183345		PNPLA1	-0.926553	0.0188472	0.00100658
ZNF471	0.527702	0.0381312	0.0018492		CDH16	-1.25921	0.0188568	0.0010119
MERTK	-2.20691	0.0388826	0.00189832		LMLN	-0.519243	0.0188568	0.00101374
RAB33A	1.03269	0.0390669	0.00191558		ACTRT3	0.65958	0.0188568	0.00101088
SPNS2	-2.04342	0.0394911	0.00193917		NR4A3	1.61336	0.0191313	0.00103525
CALHM5	-1.46343	0.0399851	0.0019723		Z99129.4	-0.788277	0.0191313	0.00103423
VGLL3	0.523542	0.0402955	0.00202416		ANKFN1	-2.01245	0.0195333	0.00106114
PTGER4	0.592546	0.0402955	0.00201701		SLFN5	0.603028	0.0197659	0.00108075
PNPLA1	-0.874951	0.0402955	0.00202051		SLC51A	1.46666	0.0199548	0.00109313
SYDE2	-0.651272	0.0417445	0.00211462		DUSP2	0.554853	0.0201347	0.00111512
FCRLA	0.998235	0.042359	0.00216367		RPTN	-4.10469	0.0202928	0.00113103
DUSP16	-0.60345	0.042735	0.00219143		RIPK4	-0.651665	0.0205738	0.00115439
QPCT	-0.913873	0.0429221	0.00222137		TNC	0.729313	0.0207417	0.00116829
WNT9A	0.711474	0.0430317	0.00223447		IFIH1	-0.521641	0.0207417	0.00116923
ATP6V1C2	-1.01102	0.0434976	0.00227435		TGM2	0.756969	0.0208672	0.00117884
FBXO32	-1.1818	0.0437075	0.00229115		SPRR3	-2.81488	0.021405	0.00123896
DUOX2	-0.656426	0.0438958	0.00232269		FANCM	-0.536199	0.021405	0.00123551
RFXAP	-0.747933	0.0440611	0.00233766		TMEM42	0.583493	0.021405	0.00123984
CENPS-CORT	-1.29768	0.0442239	0.00235254		ARFGEF3	-0.652093	0.021405	0.00123867
IFNK	2.11096	0.0442442	0.00235674		AP3B2	0.662544	0.0214828	0.00125041
BCL2A1	1.88457	0.0444178	0.00237538		ELFN2	0.656435	0.0215685	0.00125846
SMPD3	-1.5991	0.0447065	0.00239713		KAT14	-0.542863	0.0215685	0.00126079
MAPK4	-1.80143	0.0462026	0.00250343		JARID2	0.522852	0.0215958	0.0012646
TNFSF14	0.972484	0.0464363	0.00252592		POF1B	-1.89682	0.0217314	0.00127437
PELI1	0.613616	0.0469004	0.00257433		PTPRA	-0.516857	0.0217314	0.00127561
ZBED9	0.542662	0.0474755	0.00262016		SIRPB2	0.972769	0.0224078	0.00132638
FADS6	-3.04048	0.047823	0.00264521		SLIT1	-0.932612	0.0225293	0.00133676
STX3	-0.58756	0.0483299	0.00268007		FKBP11	0.522095	0.0225917	0.00134364
RBM20	-1.16463	0.0484954	0.00270636		NCOA1	-0.557348	0.0226486	0.00135342
RPTN	-3.44891	0.0494707	0.00277474		PLPP4	1.52525	0.0226486	0.00135222
					TIGD3	0.662734	0.0226511	0.00135517
					GALNT15	-2.37838	0.0226733	0.0013581
					TICRR	-0.706162	0.0227292	0.00136392
					PALMD	0.840966	0.0227515	0.00137562
					ATP1B2	-1.19148	0.0227515	0.00137522
					DPEP2NB	2.17056	0.0231712	0.0014108
					BEST2	-1.72695	0.0234022	0.00142982
					DNAJB4	0.873735	0.023472	0.0014374
					C9orf47	1.51091	0.0236566	0.00145705
					CLCN5	-0.623959	0.0237951	0.00146986
					DAW1	1.27828	0.0237951	0.00146897
					KRT23	-1.19606	0.0239375	0.00148369
					NACAD	0.700959	0.0240201	0.0014913
					WNT10B	-0.618212	0.0242267	0.00150925
					TMEM86A	-1.34488	0.0244425	0.00152544
					MYL9	0.638403	0.0244425	0.00152637
					SH2D2A	0.55964	0.0244914	0.00153438
					HES6	0.622191	0.0246869	0.00154837
					LRRC4	1.1872	0.0249242	0.00156853
					ALPP	-0.766839	0.0251916	0.00158891
					BTG1	0.566447	0.0253308	0.00160484
					S100A12	-1.74529	0.0256352	0.00162775
					KIAA0232	-0.687603	0.0257403	0.00163624
					LETM2	-0.557254	0.026083	0.0016617
					PRSS27	-1.55479	0.0261556	0.00167002
					AKR1B15	-1.36914	0.026315	0.00168576
					C4orf19	-0.693927	0.0263772	0.00169161
					CILP	-1.08421	0.0264382	0.00169751
					ECM1	-1.13911	0.0264948	0.00170663
					CEP152	-0.512072	0.026636	0.00172063
					PSORS1C2	-1.00806	0.026665	0.00172512
					P2RY2	-0.651923	0.0266789	0.00172978
					ABCG2	0.505156	0.0267772	0.00173804
					SLC15A1	-1.79657	0.0268638	0.00174935
					BAMBI	0.590726	0.0269804	0.00176953
					FCGR1A	1.35747	0.0269804	0.00177027
					QPCT	-0.913457	0.0270034	0.0017773
					MMP19	0.556039	0.0273016	0.00181061
					BCO2	-0.953694	0.0273016	0.00181017
					APOB	-1.51368	0.0275167	0.00183264
					FAP	-1.24502	0.0275604	0.00183749
					LRRC27	0.608243	0.0276475	0.00184686
					DERL3	1.01472	0.0277881	0.00186051
					TGM5	-1.16988	0.0280147	0.00188016
					CASP9	0.684209	0.0281518	0.00189877
					CSF2RB	-1.03329	0.0281518	0.00189827
					GRM5	0.793685	0.0281853	0.001905
					DLX2	0.645247	0.0281853	0.00190699
					POU3F1	0.995338	0.0281853	0.00190667
					KALRN	-1.1482	0.0286297	0.00194716
					BOC	-1.04711	0.0288859	0.00196951
					CALB1	-2.18419	0.0289707	0.00198466
					TRIM59	-0.530385	0.0290632	0.0020033
					SPRR1A	-1.99915	0.0291442	0.00201094
					MYH14	-0.86278	0.02929	0.00202595
					SPNS2	-1.92469	0.0295294	0.0020495
					UPK2	-0.747393	0.0296586	0.00206519
					L1TD1	2.02115	0.0296983	0.00207561
					SPINK5	-2.04516	0.0300917	0.00212259
					NCF2	-0.6444	0.0300917	0.00212302
					VASN	0.54261	0.0301814	0.00213361
					CYP4F22	-2.89898	0.0304148	0.00215327
					PNPLA3	-0.51455	0.0306254	0.00218484
					HACD1	0.50631	0.0306254	0.0021866
					GNG4	-0.704924	0.0306787	0.00219257
					WFDC5	-1.40575	0.0311521	0.002233
					RAB37	1.02982	0.0312786	0.00224919
					ENGASE	0.595137	0.0314208	0.00226778
					FBLN7	-0.637512	0.0314336	0.00227979
					IFI30	0.671408	0.0314651	0.00228651
					GUCY1A1	-2.35464	0.0315029	0.00229148
					SPRED3	1.00407	0.0322624	0.00235355
					ZNF433	0.573445	0.0323973	0.00236929
					KLK5	-1.10657	0.0329244	0.00242987
					IL34	-1.13238	0.0329244	0.00243205
					ZBED6	-0.756321	0.0331393	0.0024713
					ONECUT3	-1.42514	0.0334364	0.00250761
					MERTK	-2.02545	0.0352056	0.00269991
					KRT79	-1.10632	0.035247	0.00271014
					TENT5C	1.25113	0.035247	0.00270628
					AMOT	-0.829359	0.0353102	0.00271789
					SULT1B1	-1.30368	0.0358996	0.00277846
					TAGAP	1.11027	0.0359266	0.00278308
					IFNK	2.05231	0.0360805	0.0028001
					EFCAB13	0.86068	0.0361239	0.00280601
					LEKR1	0.894478	0.0365018	0.00284824
					CD68	0.597181	0.0373061	0.00294185
					SYNE4	0.985517	0.0373947	0.00295485
					AC004623.1	1.19558	0.0375531	0.00297267
					SMIM5	-1.45389	0.037693	0.0029864
					LOR	-2.7298	0.0377127	0.00299251
					AKR7A3	0.599405	0.0380732	0.00303801
					GLI4	0.556694	0.0381752	0.00305423
					FBXO27	0.552826	0.0382965	0.00306664
					RND1	0.945337	0.0383346	0.00307239
					C1orf61	0.525041	0.0384514	0.00308989
					LY6G6C	-0.97114	0.0388212	0.00313878
					A2ML1	-1.30965	0.0392142	0.00317885
					PSG8	-1.58495	0.039775	0.00323274
					DDIT3	0.784852	0.040305	0.00329572
					FAM117A	0.852861	0.0403371	0.00330119
					ABCA12	-0.821729	0.0405593	0.00332796
					LMOD1	2.19299	0.0408096	0.00336577
					SERPINB3	-0.842689	0.0409611	0.0033916
					DNAJC15	-1.12734	0.0409611	0.0033902
					KRT78	-1.62282	0.0410563	0.00342088
					C2CD4B	-1.77518	0.0411173	0.00344336
					MUC15	-2.02815	0.0413445	0.00346822
					QRICH2	0.609937	0.0413833	0.00347732
					MPP3	0.50481	0.0413922	0.00348099
					STK35	-0.504559	0.0421924	0.00357805
					PRICKLE1	-2.03998	0.0423649	0.00361958
					LCMT1-AS1	0.714385	0.0423649	0.00361725
					CRYM	-1.81164	0.0423649	0.00361701
					ZNF334	0.797533	0.0424544	0.00363022
					MIS18BP1	-0.6906	0.0424608	0.00364065
					FOXA1	0.725888	0.0428123	0.00369103
					TNNT3	-0.921831	0.0428961	0.00370734
					GCAT	0.629451	0.0431474	0.00374123
					CLDN7	0.527104	0.0433901	0.00377146
					S100A9	-0.892564	0.0434394	0.00378494
					TTK	-0.889702	0.0434394	0.00378428
					GPR162	0.960904	0.0434394	0.00378145
					C19orf44	-0.541967	0.0434445	0.00378845
					SPTLC3	-0.729047	0.0436489	0.00381551
					KLRC2	1.33902	0.0438017	0.00384163
					IL20	1.50007	0.0438017	0.00384432
					2001-12-01	2.11945	0.0440635	0.00387973
					CRISPLD2	0.913654	0.04422	0.00389975
					EMP1	0.517145	0.0442978	0.00390973
					PHACTR3	-1.08029	0.0444535	0.00392661
					SULF2	-0.593371	0.0450298	0.00399534
					FABP3	-1.15791	0.0450846	0.0040078
					CHCHD10	0.508476	0.0455347	0.00405745
					SOCS1	0.551223	0.0455347	0.00405706
					SFTA2	-1.01457	0.0456512	0.00407106
					TMEM132B	-1.80356	0.0457456	0.00408562
					ERP27	-0.554404	0.0459518	0.00411407
					KIF20B	-0.883525	0.046152	0.00415153
					LBR	-0.528283	0.0467407	0.00423293
					AC092835.1	-0.520839	0.0467407	0.00423416
					CCDC151	1.0813	0.0468163	0.00424762
					SLAMF7	-0.976958	0.0468528	0.00426174
					HPGD	-0.805417	0.0473805	0.00432221
					DUSP16	-0.545525	0.0475007	0.00433988
					CENPV	0.517186	0.04795	0.00440649
					C19orf71	1.12562	0.04795	0.0044186
					RHOF	0.510044	0.0486099	0.00453382
					TMEM35B	0.794404	0.0486099	0.004529
					ZNF625	0.647807	0.0486099	0.00453338
					CKAP2	-0.646534	0.0487502	0.00455034
					CDC25B	-0.545438	0.0488915	0.00456698
					PBX1	-0.584326	0.04896	0.00458028
					ATF7IP2	0.592489	0.0489829	0.00459657
					NKD1	0.599444	0.0489829	0.00459971
					FANCB	-0.586734	0.0494986	0.0046621
					P2RY6	-0.883649	0.0499123	0.00471868

## Sheet: Supplementary Table 4
Supplementary Table 4: Gene ontology pathways significantly enriched by L-LA and D-LA treatment of Ect cells.
Treatment	GO Category	GO Term ID	Gene Ontology	Barrier related*	p-value	FDR	Cluster frequency	Total frequency	Genes
LLA	Components	71944	cell periphery		1.4847e-09	5.1817e-07	112/323 34.6%	2262/11011 20.5%	STEAP4 SERPINE2 FRMPD1 SERPINE1 TNC ANTXR2 CLDN1 ACTB AMOT CTGF RAB43 CDH3 PLAU GJA5 PLCE1 RPTN EPHB3 TGM2 PPP1R16B MREG ANK3 LOR EREG KCTD7 CLDN4 GPR161 VCL FLG SHC4 SEMA7A FBLIM1 SLC41A2 TACSTD2 TGFA DAPP1 CSF2RB VTCN1 PCDH19 FUT1 NDRG1 ADAMTS15 CALD1 ST3GAL5 APOB SLC38A2 SLC19A2 VASP PRNP ST14 MGAM TNFSF14 TGFB3 MSN IFNLR1 FOSL1 NET1 ALPP FERMT2 CLIC5 GPSM2 PTPRR LRRC4 LAMC2 AKAP12 SMPD3 FLVCR…
LLA	Components	5615	extracellular space		9.7824e-08	1.707e-05	33/323 10.2%	405/11011 3.6%	TNXB CXCL8 SERPINE2 SERPINE1 IL24 TNC TGFA PTHLH CTGF IL1RL1 PLAU LIPH SLIT1 APOB IL33 ST14 EDN1 SERPINB2 TNFSF14 TGFB3 MMP3 INHBA NGF F3 SOD3 EREG LOX IL1B CLCF1 MFNG IFNK ANGPTL4 HBEGF
LLA	Components	5576	extracellular region		4.9349e-07	5.7409e-05	57/323 17.6%	991/11011 9.0%	CXCL8 SERPINE2 SERPINE1 IL24 TNC LAMC2 ANTXR2 METRNL CTGF FCRLA GLIPR1 PLAU LIPH RPTN EDN1 SERPINB2 VWF FST MMP3 PLAUR PSG2 WNT9A NGF F3 EREG CDCP1 PSG5 LOX IL1B MFNG SCG5 IFNK ANGPTL4 VCL HBEGF FLG TNXB SEMA3A TGFA PTHLH ADAMTS15 IL1RL1 SLIT1 CILP2 APOB IL33 ST14 COL26A1 TNFSF14 LAMB3 TGFB3 INHBA SOD3 PC ARTN CLCF1 LCN2
LLA	Components	5886	plasma membrane	x	8.343e-07	7.2792e-05	95/323 29.4%	2034/11011 18.4%	PTPRR STEAP4 SERPINE2 FRMPD1 SERPINE1 LRRC4 ANTXR2 CLDN1 AMOT CTGF SMPD3 RAB43 CDH3 PLAU GJA5 PLCE1 FLVCR2 ITGB6 CCR4 RPTN EPHB3 TGM2 VAV3 PPP1R16B MREG VWF SPHK1 ITGA2 PLAUR EMP1 ANK3 OSMR F3 RAB33A LOR EREG RHOB KCTD7 TLR1 CLDN4 CDCP1 GPR161 CDC42EP2 ARHGEF2 ITGA5 MET VCL HBEGF FLG PTGER4 SHC4 SEMA7A SLC41A2 TACSTD2 TGFA DAPP1 CSF2RB VTCN1 PCDH19 FUT1 NDRG1 PTGS1 IL1RL1 P2RY6 CALD1 HAS3 SLC17A5…
LLA	Components	30312	external encapsulating structure		9.3597e-05	0.0062966	18/323 5.5%	222/11011 2.0%	COL26A1 TNXB SERPINE2 VWF LAMB3 TGFB3 ITGA2 SERPINE1 MMP3 TNC LAMC2 WNT9A F3 CTGF ADAMTS15 CILP2 ANGPTL4 RPTN
LLA	Components	5925	focal adhesion	x	0.00010825	0.0062966	9/323 2.7%	65/11011 0.5%	VASP FBLIM1 TGFB1I1 ITGA2 ZYX FHL2 PTK2B FERMT2 VCL
LLA	Components	30055	cell-substrate junction	x	0.00019368	0.0096565	9/323 2.7%	70/11011 0.6%	VASP FBLIM1 TGFB1I1 ITGA2 ZYX FHL2 PTK2B FERMT2 VCL
LLA	Components	31012	extracellular matrix		0.00024636	0.010748	17/323 5.2%	219/11011 1.9%	COL26A1 TNXB SERPINE2 VWF LAMB3 TGFB3 SERPINE1 MMP3 TNC LAMC2 WNT9A F3 CTGF ADAMTS15 CILP2 ANGPTL4 RPTN
LLA	Components	9986	cell surface		0.00053683	0.020817	16/323 4.9%	213/11011 1.9%	PTPRR SERPINE2 VWF TGFB3 ITGA2 PLAUR TGFA ELFN2 F3 AMOT IL1RL1 PLAU ALPP ANXA9 ITGA5 HBEGF
LLA	Components	70161	anchoring junction	x	0.00092538	0.032296	16/323 4.9%	224/11011 2.0%	VASP FBLIM1 TGFB1I1 ITGA2 FHL2 CLDN1 AMOT CLDN4 CDH3 GJA5 ZYX PTK2B ARHGEF2 STX3 FERMT2 VCL
LLA	Components	98802	plasma membrane signaling receptor complex	x	0.0010603	0.03364	7/323 2.1%	55/11011 0.4%	TLR1 ITGA2 IFNLR1 CSF2RB ITGB6 ITGA5 OSMR
LLA	Components	5938	cell cortex		0.0012485	0.036311	10/323 3.0%	108/11011 0.9%	AKAP12 CLIC5 GPSM2 FBLIM1 CALD1 PTK2B EXOC6 ACTB FERMT2 CTGF
LLA	Components	30424	axon		0.0015295	0.041061	12/323 3.7%	150/11011 1.3%	SPHK1 AMIGO1 ATL1 ITGA2 SEMA3A PTK2B APBB2 STX3 KLHL24 ACTB TNFRSF21 CDK5R1
LLA	Functions	5102	signaling receptor binding		1.6458e-06	0.00079534	36/307 11.7%	536/10687 5.0%	SHC4 TNXB CXCL8 SERPINE2 TGFB1I1 SEMA3A IL24 TNC TGFA PTHLH CTGF SOCS1 SLIT1 ITGB6 APOB VAV3 IL33 PTPN1 EDN1 TNFSF14 VWF TGFB3 FEM1B ITGA2 MSN INHBA NGF EREG ARTN IL1B CLCF1 CDC42EP2 IFNK ANGPTL4 ITGA5 HBEGF
LLA	Functions	48018	receptor ligand activity		3.2472e-06	0.00079534	19/307 6.1%	195/10687 1.8%	IL33 EDN1 CXCL8 TNFSF14 TGFB3 SEMA3A IL24 TGFA INHBA NGF PTHLH EREG CTGF ARTN IL1B CLCF1 CDC42EP2 IFNK HBEGF
LLA	Functions	30546	signaling receptor activator activity		4.0717e-06	0.00079534	19/307 6.1%	198/10687 1.8%	IL33 EDN1 CXCL8 TNFSF14 TGFB3 SEMA3A IL24 TGFA INHBA NGF PTHLH EREG CTGF ARTN IL1B CLCF1 CDC42EP2 IFNK HBEGF
LLA	Functions	30545	signaling receptor regulator activity		6.7775e-06	0.0009929	19/307 6.1%	205/10687 1.9%	IL33 EDN1 CXCL8 TNFSF14 TGFB3 SEMA3A IL24 TGFA INHBA NGF PTHLH EREG CTGF ARTN IL1B CLCF1 CDC42EP2 IFNK HBEGF
LLA	Functions	38023	signaling receptor activity		4.8711e-05	0.0050917	35/307 11.4%	600/10687 5.6%	FLG PTGER4 PTPRR SEMA7A ZFYVE9 SEMA3A TACSTD2 CSF2RB AHR ANTXR2 AMOT IL1RL1 P2RY6 S1PR3 ANXA9 ITGB6 S1PR5 CCR4 EPHB3 ITGA2 SEMA4B PLAUR IFNLR1 NR1D2 OSMR MERTK TLR1 CLDN4 P2RX2 GPR161 ITGA5 MET LGR4 TNFRSF21 HBEGF
LLA	Functions	60089	molecular transducer activity		5.2133e-05	0.0050917	35/307 11.4%	602/10687 5.6%	FLG PTGER4 PTPRR SEMA7A ZFYVE9 SEMA3A TACSTD2 CSF2RB AHR ANTXR2 AMOT IL1RL1 P2RY6 S1PR3 ANXA9 ITGB6 S1PR5 CCR4 EPHB3 ITGA2 SEMA4B PLAUR IFNLR1 NR1D2 OSMR MERTK TLR1 CLDN4 P2RX2 GPR161 ITGA5 MET LGR4 TNFRSF21 HBEGF
LLA	Functions	50839	cell adhesion molecule binding	x	0.0001316	0.011017	9/307 2.9%	68/10687 0.6%	TNXB VWF ITGA2 MSN ITGB6 ITGA5 VCL CDK5R1 CTGF
LLA	Functions	8201	heparin binding		0.00016516	0.012098	9/307 2.9%	70/10687 0.6%	FLG TNXB SERPINE2 LIPH LAMC2 APOB SOD3 HBEGF CTGF
LLA	Functions	1901681	sulfur compound binding		0.00021189	0.013797	12/307 3.9%	123/10687 1.1%	FLG TNXB PC SERPINE2 LIPH FST SLIT1 LAMC2 APOB SOD3 HBEGF CTGF
LLA	Functions	8083	growth factor activity		0.00027101	0.015881	10/307 3.2%	91/10687 0.8%	ARTN TGFB3 IL1B CLCF1 TGFA INHBA NGF EREG HBEGF CTGF
LLA	Functions	5154	epidermal growth factor receptor binding	x	0.00038885	0.020715	4/307 1.3%	13/10687 0.1%	VAV3 TGFA EREG HBEGF
LLA	Processes	32502	developmental process		8.0884e-13	2.1281e-09	120/287 41.8%	2311/9984 23.1%	EHF STEAP4 SERPINE2 SERPINE1 TNC AHR PRDM1 CLDN1 ACTB AMOT CTGF RGS2 FRAT2 FADS6 PLAU GJA5 PLCE1 SOX9 MNX1 EPHB3 IER3 TGM2 KRT4 FST ARID5B OVOL1 HIC1 LOR EREG PIAS1 LOX GPR161 MFNG ERG VCL FLG SEMA7A ZFP36L1 CYP27B1 SOCS1 CHST11 APOB VASP TGFB3 INHBA EXT1 RCAN1 BCL6 ARTN CYP1A1 ZSCAN2 TP73 CLIC5 PTPRR CXCL8 CITED2 TGFB1I1 LAMC2 FCRLA SMPD3 CYP26B1 ZNF408 JARID2 CCR4 ZNF488 HIST1H1B VAV3 EDN1 VWF …
LLA	Processes	48856	anatomical structure development		1.208e-11	1.5892e-08	111/287 38.6%	2140/9984 21.4%	EHF SERPINE2 SERPINE1 TNC AHR PRDM1 CLDN1 ACTB AMOT CTGF FRAT2 PLAU GJA5 PLCE1 SOX9 MNX1 EPHB3 IER3 TGM2 KRT4 FST ARID5B OVOL1 HIC1 LOR EREG LOX GPR161 MFNG ERG VCL FLG SEMA7A ZFP36L1 CYP27B1 SOCS1 CHST11 APOB VASP TGFB3 INHBA EXT1 RCAN1 BCL6 ARTN CYP1A1 ZSCAN2 TP73 CLIC5 PTPRR CXCL8 CITED2 TGFB1I1 LAMC2 SMPD3 CYP26B1 ZNF408 JARID2 CCR4 ZNF488 HIST1H1B VAV3 EDN1 VWF SPHK1 ITGA2 PLAUR EMP1 KRT34 W…
LLA	Processes	32501	multicellular organismal process		4.4807e-10	3.9296e-07	121/287 42.1%	2559/9984 25.6%	EHF SERPINE2 TNC AHR PRDM1 CLDN1 ACTB ACTG2 AMOT CTGF RGS2 FRAT2 CDH3 PLAU GJA5 LIPH PLCE1 SOX9 MNX1 EPHB3 TGM2 FST ARID5B PSG2 OVOL1 HIC1 LOR EREG PIAS1 PSG5 LOX GPR161 MFNG ERG VCL FLG SEMA7A TACSTD2 CSF2RB ZFP36L1 CYP27B1 SOCS1 CHST11 CALD1 APOB VASP TGFB3 IFNLR1 INHBA EXT1 FOSL1 RCAN1 BCL6 ARTN CYP1A1 REL ZSCAN2 TP73 CLIC5 PTPRR CXCL8 CITED2 TGFB1I1 SMPD3 CYP26B1 ZNF408 JARID2 CCR4 ZNF488 HIS…
LLA	Processes	48583	regulation of response to stimulus		1.5804e-09	1.0395e-06	59/287 20.5%	912/9984 9.1%	CXCL8 SERPINE2 ZFYVE9 CITED2 TGFB1I1 SERPINE1 TNFAIP3 SH3RF1 AKAP12 RGS2 CYP26B1 PLAU PLCE1 CCR4 MCF2L2 ARFGEF3 TGM2 VAV3 EDN1 SPHK1 FST ITGA2 FOXL1 OSMR TICAM1 F3 EREG IL1B RASA2 PELI1 IFNK ARHGEF2 ITGA5 TRIB1 HBEGF FLG SEMA3A TGFA CYP27B1 IL1RL1 SOCS1 CHST11 SLIT1 PTK2B RGS20 PTPN1 TNFSF14 TGFB3 NOS3 PLK2 SPRY4 IFNLR1 INHBA NET1 PC BCL6 P2RX2 REL TP73
LLA	Processes	7275	multicellular organism development		2.0008e-09	1.0528e-06	100/287 34.8%	2000/9984 20.0%	EHF SERPINE2 TNC AHR PRDM1 CLDN1 ACTB AMOT CTGF FRAT2 PLAU GJA5 PLCE1 SOX9 MNX1 EPHB3 TGM2 FST ARID5B HIC1 LOR EREG LOX GPR161 MFNG ERG FLG SEMA7A ZFP36L1 CYP27B1 SOCS1 CHST11 APOB VASP TGFB3 INHBA EXT1 RCAN1 BCL6 ARTN CYP1A1 ZSCAN2 TP73 CLIC5 PTPRR CXCL8 CITED2 TGFB1I1 SMPD3 CYP26B1 ZNF408 JARID2 CCR4 ZNF488 HIST1H1B VAV3 EDN1 VWF SPHK1 ITGA2 EMP1 WNT9A FOXL1 NAV2 NGF RHOB ALDH1A3 IL1B IRF1 ACSB…
LLA	Processes	42127	regulation of cell population proliferation		2.6429e-09	1.1589e-06	47/287 16.3%	647/9984 6.4%	FLG CDKN1B CXCL8 TGFB1I1 SERPINE1 TGFA ETS1 PTHLH PTGS1 CTGF CYP27B1 CHST11 PLAU SESN1 SLIT1 PTK2B S1PR3 SOX9 JARID2 TGM2 EDN1 KRT4 EGR4 TGFB3 NOS3 SPHK1 ITGA2 IFNLR1 WNT9A INHBA OSMR TICAM1 NGF F3 DHRS2 EREG FOSL1 KLF5 BCL6 IL1B PELI1 IFNK ARHGEF2 IRF6 TRIB1 HSPA1B HSPA1A
LLA	Processes	9966	regulation of signal transduction		1.8633e-08	6.582e-06	49/287 17.0%	734/9984 7.3%	ZFYVE9 CITED2 TGFB1I1 SERPINE1 TNFAIP3 SH3RF1 AKAP12 RGS2 CYP26B1 PLAU PLCE1 MCF2L2 ARFGEF3 TGM2 VAV3 EDN1 SPHK1 FST FOXL1 TICAM1 F3 EREG IL1B RASA2 PELI1 ARHGEF2 ITGA5 TRIB1 HBEGF FLG TGFA CYP27B1 IL1RL1 SOCS1 CHST11 SLIT1 PTK2B RGS20 PTPN1 TNFSF14 TGFB3 PLK2 SPRY4 INHBA NET1 BCL6 P2RX2 REL TP73
LLA	Processes	32101	regulation of response to external stimulus		2.0014e-08	6.582e-06	21/287 7.3%	172/9984 1.7%	EDN1 CXCL8 SERPINE2 NOS3 ITGA2 SEMA3A SERPINE1 IFNLR1 OSMR F3 EREG CYP27B1 PC BCL6 PLAU IL1B IFNK SLIT1 TRIB1 CCR4 TGM2
LLA	Processes	51239	regulation of multicellular organismal process		2.9865e-08	8.2325e-06	44/287 15.3%	630/9984 6.3%	FLG PTGER4 SERPINE2 TGFB1I1 AMIGO1 SEMA3A SERPINE1 TNC ETS1 PTHLH PTGS1 AMOT CTGF CYP27B1 PLAU SLIT1 PLCE1 PTK2B S1PR3 SOX9 ZNF488 EDN1 RSAD2 TGFB3 NOS3 SPHK1 FST ITGA2 WNT9A INHBA TICAM1 NGF F3 EREG RHOB TLR1 PC BCL6 IL1B IRF1 REL PELI1 ANGPTL4 HBEGF
LLA	Processes	10646	regulation of cell communication		3.1291e-08	8.2325e-06	52/287 18.1%	817/9984 8.1%	ZFYVE9 CITED2 TGFB1I1 SERPINE1 TNFAIP3 SH3RF1 AKAP12 RGS2 CYP26B1 PLAU PLCE1 MCF2L2 ARFGEF3 TGM2 VAV3 EDN1 SPHK1 FST ITGA2 FOXL1 TICAM1 NGF F3 EREG IL1B RASA2 PELI1 SCG5 ARHGEF2 ITGA5 TRIB1 HBEGF FLG TGFA CYP27B1 IL1RL1 SOCS1 CHST11 SLIT1 PTK2B RGS20 PTPN1 TNFSF14 TGFB3 PLK2 SPRY4 INHBA NET1 BCL6 P2RX2 REL TP73
LLA	Processes	23051	regulation of signaling		3.829e-08	9.1582e-06	52/287 18.1%	822/9984 8.2%	ZFYVE9 CITED2 TGFB1I1 SERPINE1 TNFAIP3 SH3RF1 AKAP12 RGS2 CYP26B1 PLAU PLCE1 MCF2L2 ARFGEF3 TGM2 VAV3 EDN1 SPHK1 FST ITGA2 FOXL1 TICAM1 NGF F3 EREG IL1B RASA2 PELI1 SCG5 ARHGEF2 ITGA5 TRIB1 HBEGF FLG TGFA CYP27B1 IL1RL1 SOCS1 CHST11 SLIT1 PTK2B RGS20 PTPN1 TNFSF14 TGFB3 PLK2 SPRY4 INHBA NET1 BCL6 P2RX2 REL TP73
LLA	Processes	50896	response to stimulus		4.9907e-08	1.0924e-05	140/287 48.7%	3354/9984 33.5%	ZFYVE9 SERPINE1 RASEF JADE1 TNC AHR ETS1 ACTB AMOT CTGF RAB43 SYDE2 FRAT2 CDH3 FADS6 PLAU SESN1 PLCE1 MNX1 EPHB3 TGM2 PPP1R16B CARD10 RSAD2 FST ARID5B ANK3 TICAM1 EREG PIAS1 ERN2 LOX SCG5 ERG TRIB1 FLG SEMA7A DCUN1D3 TACSTD2 DAPP1 CSF2RB NDRG1 CYP27B1 NUAK2 SOCS1 STK38L APOB VASP PRNP TNFSF14 GADD45A TGFB3 HSPA6 IFNLR1 INHBA CORO2A EXT1 FOSL1 NET1 RCAN1 CDK7 BCL6 ARTN JMY CYP1A1 LCN2 TP73 GPSM2 C…
LLA	Processes	42221	response to chemical		5.3978e-08	1.0924e-05	66/287 22.9%	1182/9984 11.8%	CXCL8 ZFYVE9 TGFB1I1 SERPINE1 TNC FHL2 AHR ETS1 ACTB AMOT CTGF CDH3 FADS6 PLAU CCR4 MNX1 EPHB3 DUSP4 SPHK1 FST ITGA2 MMP3 PLAUR WNT9A OSMR TICAM1 NGF F3 EREG PIAS1 TLR1 ALDH1A3 LOX IL1B PELI1 IFNK ACSBG1 TRIB1 FLG SEMA3A NDRG1 PTGS1 CYP27B1 SOCS1 SLIT1 PTK2B STX3 APOB DUOX2 VASP PRNP HSPA1L TGFB3 NOS3 HSPA6 DHRS2 SOD3 EXT1 FOSL1 CDK7 CLCF1 KLF9 CYP1A1 HSPA1B CDK5R1 HSPA1A
LLA	Processes	30154	cell differentiation		1.7327e-07	3.2562e-05	63/287 21.9%	1140/9984 11.4%	CLIC5 EHF PTPRR STEAP4 SERPINE2 CITED2 TGFB1I1 PRDM1 ACTB AMOT CTGF FCRLA RGS2 CYP26B1 SOX9 JARID2 CCR4 ZNF488 MNX1 EPHB3 EDN1 KRT4 FST ITGA2 EMP1 WNT9A NGF LOR EREG RHOB ARL4A IRF1 ANGPTL4 IRF6 FLG SLFN5 SEMA7A AMIGO1 ATL1 SEMA3A ZFP36L1 SOCS1 CHST11 NHS SLIT1 PTK2B STX3 VASP LAMB3 FEM1B NOS3 SEMA4B INHBA DHRS2 EXT1 RCAN1 BCL6 ARTN CLCF1 CYP1A1 ZSCAN2 TP73 CDK5R1
LLA	Processes	10941	regulation of cell death		2.2271e-07	3.5965e-05	37/287 12.8%	516/9984 5.1%	FLG BCL2A1 CITED2 DCUN1D3 SERPINE1 TNFAIP3 CTGF IFIH1 NUAK2 CHST11 BAG3 SOX9 IER3 CARD10 PRNP SERPINB2 TGFB3 FEM1B NOS3 SPHK1 NGF F3 DHRS2 FOSL1 ALDH1A3 PC BCL6 IL1B CLCF1 JMY LCN2 ERCC5 ANGPTL4 HSPA1B TP73 CDK5R1 HSPA1A
LLA	Processes	50794	regulation of cellular process		2.3212e-07	3.5965e-05	184/287 64.1%	4928/9984 49.3%	EHF SERPINE2 ZFYVE9 ZNF292 SERPINE1 RASEF JADE1 TNC AHR PRDM1 ETS1 BACH2 AMOT CTGF RAB43 SYDE2 RGS2 FRAT2 SESN3 FADS6 PLAU SESN1 MYB PLCE1 SOX9 MNX1 EPHB3 IER3 TGM2 PPP1R16B CARD10 MBNL2 KRT4 FST ARID5B ANK3 OVOL1 TICAM1 HIC1 EREG PIAS1 ERN2 MYCL SCG5 ERG TRIB1 VCL FLG DCUN1D3 TACSTD2 TGFA DAPP1 CSF2RB ZFP36L1 CYP27B1 NUAK2 SOCS1 CHST11 BAG3 STK38L HIVEP2 APOB PRNP EGR4 TNFSF14 GADD45A TGFB3 PLK2…
LLA	Processes	51240	positive regulation of multicellular organismal process		2.3238e-07	3.5965e-05	28/287 9.7%	328/9984 3.2%	FLG SERPINE2 TGFB1I1 AMIGO1 SERPINE1 PTGS1 AMOT CTGF CYP27B1 ZNF488 EDN1 TGFB3 NOS3 SPHK1 FST ITGA2 INHBA TICAM1 NGF F3 EREG RHOB TLR1 IL1B IRF1 REL PELI1 ANGPTL4
LLA	Processes	48869	cellular developmental process		2.6128e-07	3.8191e-05	63/287 21.9%	1153/9984 11.5%	CLIC5 EHF PTPRR STEAP4 SERPINE2 CITED2 TGFB1I1 PRDM1 ACTB AMOT CTGF FCRLA RGS2 CYP26B1 SOX9 JARID2 CCR4 ZNF488 MNX1 EPHB3 EDN1 KRT4 FST ITGA2 EMP1 WNT9A NGF LOR EREG RHOB ARL4A IRF1 ANGPTL4 IRF6 FLG SLFN5 SEMA7A AMIGO1 ATL1 SEMA3A ZFP36L1 SOCS1 CHST11 NHS SLIT1 PTK2B STX3 VASP LAMB3 FEM1B NOS3 SEMA4B INHBA DHRS2 EXT1 RCAN1 BCL6 ARTN CLCF1 CYP1A1 ZSCAN2 TP73 CDK5R1
LLA	Processes	42981	regulation of apoptotic process		3.4571e-07	4.6262e-05	36/287 12.5%	503/9984 5.0%	FLG BCL2A1 CITED2 DCUN1D3 SERPINE1 TNFAIP3 IFIH1 NUAK2 CHST11 BAG3 SOX9 IER3 CARD10 PRNP SERPINB2 TGFB3 FEM1B NOS3 SPHK1 NGF F3 DHRS2 FOSL1 ALDH1A3 PC BCL6 IL1B CLCF1 JMY LCN2 ERCC5 ANGPTL4 HSPA1B TP73 CDK5R1 HSPA1A
LLA	Processes	50789	regulation of biological process		3.6746e-07	4.6262e-05	189/287 65.8%	5133/9984 51.4%	EHF SERPINE2 ZFYVE9 ZNF292 SERPINE1 RASEF JADE1 TNC AHR PRDM1 ETS1 BACH2 AMOT CTGF RAB43 SYDE2 RGS2 FRAT2 SESN3 FADS6 PLAU LIPH SESN1 MYB PLCE1 SOX9 MNX1 EPHB3 IER3 TGM2 PPP1R16B CARD10 MBNL2 KRT4 RSAD2 FST ARID5B ANK3 OVOL1 TICAM1 HIC1 EREG PIAS1 ERN2 MYCL SCG5 ERG TRIB1 VCL FLG FBLIM1 DCUN1D3 TACSTD2 TGFA DAPP1 CSF2RB ZFP36L1 CYP27B1 NUAK2 SOCS1 CHST11 BAG3 STK38L HIVEP2 APOB PRNP EGR4 TNFSF14 …
LLA	Processes	33993	response to lipid		3.6925e-07	4.6262e-05	26/287 9.0%	296/9984 2.9%	TGFB1I1 SERPINE1 FHL2 PTGS1 CTGF CYP27B1 SOCS1 FADS6 SLIT1 TGFB3 NOS3 SPHK1 WNT9A TICAM1 NGF F3 PIAS1 FOSL1 CDK7 LOX IL1B KLF9 CYP1A1 PELI1 ACSBG1 TRIB1
LLA	Processes	40011	locomotion		4.3123e-07	5.0553e-05	28/287 9.7%	338/9984 3.3%	DNAH3 CXCL8 SEMA3A ETS1 AMOT CTGF PLAU SLIT1 PTK2B APOB CCR4 MNX1 EPHB3 VASP VAV3 NOS3 PLAUR ARID5B MSN PSG2 EXT1 FOSL1 PC IL1B JMY S100P ITGA5 CDK5R1
LLA	Processes	6928	movement of cell or subcellular component	x	4.5154e-07	5.0553e-05	33/287 11.4%	443/9984 4.4%	DNAH3 CXCL8 SEMA3A ETS1 ACTB ACTG1 AMOT CTGF CALD1 SLIT1 PTK2B APOB CCR4 MNX1 EPHB3 VASP VAV3 NOS3 ITGA2 PLAUR KIF24 ARID5B MSN PSG2 EXT1 PC IL1B JMY S100P HAP1 ITGA5 VCL CDK5R1
LLA	Processes	43067	regulation of programmed cell death		4.6115e-07	5.0553e-05	36/287 12.5%	509/9984 5.0%	FLG BCL2A1 CITED2 DCUN1D3 SERPINE1 TNFAIP3 IFIH1 NUAK2 CHST11 BAG3 SOX9 IER3 CARD10 PRNP SERPINB2 TGFB3 FEM1B NOS3 SPHK1 NGF F3 DHRS2 FOSL1 ALDH1A3 PC BCL6 IL1B CLCF1 JMY LCN2 ERCC5 ANGPTL4 HSPA1B TP73 CDK5R1 HSPA1A
LLA	Processes	14070	response to organic cyclic compound		4.8768e-07	5.1324e-05	27/287 9.4%	320/9984 3.2%	TGFB1I1 SERPINE1 FHL2 PTGS1 CTGF CYP27B1 SOCS1 FADS6 SLIT1 PTK2B DUOX2 TGFB3 NOS3 SPHK1 ITGA2 TICAM1 NGF F3 PIAS1 FOSL1 CDK7 LOX IL1B KLF9 CYP1A1 PELI1 ACSBG1
LLA	Processes	48731	system development		5.5501e-07	5.6163e-05	79/287 27.5%	1615/9984 16.1%	CLIC5 PTPRR CXCL8 SERPINE2 CITED2 TNC AHR PRDM1 CLDN1 ACTB AMOT CTGF PLAU ZNF408 GJA5 PLCE1 SOX9 JARID2 CCR4 ZNF488 MNX1 HIST1H1B EPHB3 TGM2 VAV3 EDN1 VWF SPHK1 FST ITGA2 ARID5B WNT9A FOXL1 NAV2 NGF LOR EREG ALDH1A3 LOX IRF1 ACSBG1 HAP1 IRF6 ITGA5 HBEGF FLG TAGLN SEMA7A AMIGO1 ATL1 SEMA3A PTHLH ZFP36L1 CYP27B1 SOCS1 CHST11 NHS SLIT1 PTK2B STX3 APOB VASP TGFB3 FEM1B NOS3 SEMA4B INHBA DHRS2 EXT1 RC…
LLA	Processes	1558	regulation of cell growth		6.7689e-07	6.596e-05	19/287 6.6%	176/9984 1.7%	CDKN1B DCUN1D3 SPHK1 SEMA3A JADE1 INHBA NGF CTGF NET1 CYP27B1 BCL6 SLIT1 PLCE1 PTK2B APBB2 HSPA1B TP73 HBEGF HSPA1A
LLA	Processes	44706	multi-multicellular organism process		7.1553e-07	6.7235e-05	14/287 4.8%	98/9984 0.9%	CLIC5 CITED2 TGFB3 SPHK1 PSG2 PRDM1 PTHLH FOSL1 CYP27B1 PSG5 PLAU IL1B KLF9 CYP1A1
LLA	Processes	8544	epidermis development	x	7.5236e-07	6.8257e-05	17/287 5.9%	144/9984 1.4%	FLG CLIC5 LAMB3 FST EMP1 KRT34 GRHL3 LAMC2 INHBA OVOL1 LOR PTHLH EREG CTGF PC SOX9 IRF6
LLA	Processes	61041	regulation of wound healing	x	7.9695e-07	6.9892e-05	8/287 2.7%	28/9984 0.2%	EDN1 PC SERPINE2 PLAU NOS3 SERPINE1 F3 HBEGF
LLA	Processes	51128	regulation of cellular component organization	x	1.1086e-06	9.409e-05	36/287 12.5%	528/9984 5.2%	CDKN1B DCUN1D3 AMIGO1 SEMA3A SERPINE1 JADE1 TGFA AHR AMOT CTGF CYP27B1 SLIT1 PLCE1 STK38L PTK2B APBB2 JARID2 EDN1 TGFB3 SPHK1 ITGA2 INHBA NGF EREG NET1 EHD4 PC BCL6 IL1B JMY CDC42EP2 ARHGEF2 HSPA1B TP73 HBEGF HSPA1A
LLA	Processes	7565	female pregnancy		1.2142e-06	9.7284e-05	13/287 4.5%	88/9984 0.8%	CLIC5 CITED2 TGFB3 SPHK1 PSG2 PRDM1 PTHLH FOSL1 CYP27B1 PSG5 PLAU IL1B KLF9
LLA	Processes	43066	negative regulation of apoptotic process		1.2202e-06	9.7284e-05	26/287 9.0%	315/9984 3.1%	FLG BCL2A1 CITED2 SERPINE1 TNFAIP3 NUAK2 CHST11 BAG3 IER3 PRNP SERPINB2 TGFB3 NOS3 SPHK1 NGF F3 DHRS2 PC BCL6 IL1B CLCF1 ERCC5 ANGPTL4 HSPA1B TP73 HSPA1A
LLA	Processes	51270	regulation of cellular component movement	x	1.3394e-06	0.00010095	19/287 6.6%	184/9984 1.8%	EDN1 SERPINE2 CITED2 SPHK1 ITGA2 SEMA3A SERPINE1 TNC F3 ETS1 AMOT P2RY6 PC BCL6 PLAU PTK2B TRIB1 VCL HBEGF
LLA	Processes	48545	response to steroid hormone		1.343e-06	0.00010095	17/287 5.9%	150/9984 1.5%	TGFB3 TGFB1I1 SPHK1 SERPINE1 FHL2 NGF PTGS1 CTGF PIAS1 FOSL1 CDK7 SOCS1 LOX IL1B KLF9 SLIT1 ACSBG1
LLA	Processes	43069	negative regulation of programmed cell death		1.4593e-06	0.00010665	26/287 9.0%	318/9984 3.1%	FLG BCL2A1 CITED2 SERPINE1 TNFAIP3 NUAK2 CHST11 BAG3 IER3 PRNP SERPINB2 TGFB3 NOS3 SPHK1 NGF F3 DHRS2 PC BCL6 IL1B CLCF1 ERCC5 ANGPTL4 HSPA1B TP73 HSPA1A
LLA	Processes	40012	regulation of locomotion		1.5785e-06	0.00011224	19/287 6.6%	186/9984 1.8%	EDN1 CXCL8 SERPINE2 CITED2 SPHK1 ITGA2 SEMA3A SERPINE1 F3 AMOT P2RY6 PC PLAU SLIT1 PTK2B TRIB1 CCR4 VCL HBEGF
LLA	Processes	8285	negative regulation of cell population proliferation		1.8721e-06	0.00012962	25/287 8.7%	302/9984 3.0%	CDKN1B CXCL8 TGFB1I1 ETS1 PTHLH CYP27B1 SESN1 SLIT1 JARID2 KRT4 TGFB3 NOS3 IFNLR1 WNT9A INHBA DHRS2 EREG FOSL1 BCL6 IL1B IFNK IRF6 TRIB1 HSPA1B HSPA1A
LLA	Processes	9888	tissue development		2.0134e-06	0.00013583	38/287 13.2%	588/9984 5.8%	FLG CLIC5 EHF CITED2 TGFB1I1 SEMA3A TNC LAMC2 PTHLH CTGF CYP27B1 CHST11 GJA5 SOX9 MNX1 TGM2 VASP EDN1 KRT4 LAMB3 FEM1B FST ITGA2 EMP1 KRT34 GRHL3 INHBA OVOL1 LOR EREG EXT1 RCAN1 ALDH1A3 PC CYP1A1 IRF6 ITGA5 VCL
LLA	Processes	60548	negative regulation of cell death		2.0718e-06	0.00013627	26/287 9.0%	324/9984 3.2%	FLG BCL2A1 CITED2 SERPINE1 TNFAIP3 NUAK2 CHST11 BAG3 IER3 PRNP SERPINB2 TGFB3 NOS3 SPHK1 NGF F3 DHRS2 PC BCL6 IL1B CLCF1 ERCC5 ANGPTL4 HSPA1B TP73 HSPA1A
LLA	Processes	9653	anatomical structure morphogenesis		2.1658e-06	0.00013898	48/287 16.7%	833/9984 8.3%	FLG CLIC5 CXCL8 CITED2 TGFB1I1 ATL1 SEMA3A TNC ACTB AMOT CTGF ZFP36L1 CYP26B1 CHST11 PLAU GJA5 SLIT1 PTK2B S1PR3 SOX9 APOB MNX1 EPHB3 IER3 TGM2 VASP VAV3 EDN1 TGFB3 FEM1B FST ITGA2 ARID5B WNT9A INHBA FOXL1 EREG EXT1 ALDH1A3 KLF5 PC BCL6 ARHGEF2 ITGA5 LGR4 VCL TP73 CDK5R1
LLA	Processes	48518	positive regulation of biological process		3.016e-06	0.00018893	75/287 26.1%	1570/9984 15.7%	EHF CXCL8 SERPINE2 CITED2 TGFB1I1 SERPINE1 FHL2 AHR PRDM1 ETS1 AMOT CTGF AKAP12 SOX9 JARID2 CCR4 ZNF488 TGM2 VAV3 CARD10 EDN1 SPHK1 FST ITGA2 OSMR TICAM1 NGF F3 EREG RHOB PIAS1 TLR1 ALDH1A3 ELF4 IL1B IRF1 CDC42EP2 PELI1 IFNK ANGPTL4 IRF6 ITGA5 TRIB1 HBEGF FLG DCUN1D3 AMIGO1 TGFA PTHLH PTGS1 ZFP36L1 CYP27B1 P2RY6 PTK2B S1PR3 APOB COL26A1 EGR4 TNFSF14 TGFB3 NOS3 PLK2 GRHL3 INHBA FOSL1 CDK7 KLF5 PC …
LLA	Processes	1903034	regulation of response to wounding	x	3.1411e-06	0.00019219	8/287 2.7%	33/9984 0.3%	EDN1 PC SERPINE2 PLAU NOS3 SERPINE1 F3 HBEGF
LLA	Processes	65007	biological regulation		3.2257e-06	0.00019288	193/287 67.2%	5407/9984 54.1%	EHF SERPINE2 ZFYVE9 ZNF292 SERPINE1 BACH2 FRAT2 LIPH MYB PLCE1 SOX9 MNX1 EPHB3 IER3 MBNL2 KRT4 RSAD2 ANK3 OVOL1 EREG TRIB1 FLG DCUN1D3 TGFA CYP27B1 NUAK2 CHST11 STK38L HIVEP2 APOB EGR4 TNFSF14 GADD45A PLK2 IFNLR1 NR1D2 ELL2 EXT1 FOSL1 NET1 EHD4 ARTN CYP1A1 REL FERMT2 TP73 LIN54 CDKN1B CITED2 TGFB1I1 SH3RF1 AKAP12 IFIH1 SMPD3 JARID2 CCR4 MCF2L2 ZNF488 DUSP4 VAV3 TIGD2 EDN1 SERPINB2 SPHK1 WNT9A OSM…
LLA	Processes	48523	negative regulation of cellular process		4.53e-06	0.00026002	72/287 25.0%	1502/9984 15.0%	CDKN1B CXCL8 SERPINE2 CITED2 TGFB1I1 SERPINE1 JADE1 TNFAIP3 PRDM1 ETS1 RGS2 CYP26B1 SESN1 SOX9 JARID2 IER3 EDN1 SERPINB2 KRT4 SPHK1 FST ARID5B WNT9A OVOL1 NGF F3 EREG RHOB PIAS1 ERN2 IL1B IFNK ANGPTL4 ARHGEF2 IRF6 TRIB1 VCL HBEGF FLG BCL2A1 DCUN1D3 SEMA3A PTHLH PTGS1 ZFP36L1 CYP27B1 IL1RL1 NUAK2 SOCS1 CHST11 BAG3 SLIT1 RGS20 APBB2 PRNP PTPN1 GADD45A TGFB3 NOS3 SPRY4 IFNLR1 INHBA DHRS2 FOSL1 PER1 …
LLA	Processes	30193	regulation of blood coagulation		4.645e-06	0.00026002	7/287 2.4%	25/9984 0.2%	EDN1 PC SERPINE2 PLAU NOS3 SERPINE1 F3
LLA	Processes	1900046	regulation of hemostasis		4.645e-06	0.00026002	7/287 2.4%	25/9984 0.2%	EDN1 PC SERPINE2 PLAU NOS3 SERPINE1 F3
LLA	Processes	30195	negative regulation of blood coagulation		5.0743e-06	0.00026178	6/287 2.0%	17/9984 0.1%	EDN1 PC SERPINE2 PLAU NOS3 SERPINE1
LLA	Processes	14910	regulation of smooth muscle cell migration		5.0743e-06	0.00026178	6/287 2.0%	17/9984 0.1%	P2RY6 PLAU ITGA2 SERPINE1 TRIB1 F3
LLA	Processes	1900047	negative regulation of hemostasis		5.0743e-06	0.00026178	6/287 2.0%	17/9984 0.1%	EDN1 PC SERPINE2 PLAU NOS3 SERPINE1
LLA	Processes	61045	negative regulation of wound healing	x	5.0743e-06	0.00026178	6/287 2.0%	17/9984 0.1%	EDN1 PC SERPINE2 PLAU NOS3 SERPINE1
LLA	Processes	9605	response to external stimulus		5.6273e-06	0.00028472	38/287 13.2%	614/9984 6.1%	CXCL8 SEMA3A SERPINE1 AMOT IFIH1 CYP27B1 IL1RL1 NUAK2 SOCS1 FADS6 PLAU SLIT1 PTK2B APOB CCR4 MNX1 DUOX2 EPHB3 VASP RSAD2 NOS3 SPHK1 ITGA2 PLAUR TICAM1 NGF F3 EXT1 FOSL1 TLR1 PER1 IL1B CYP1A1 PELI1 LCN2 IFNK TRIB1 CDK5R1
LLA	Processes	51674	localization of cell		6.1836e-06	0.00030128	21/287 7.3%	242/9984 2.4%	VAV3 DNAH3 CXCL8 NOS3 ARID5B MSN PSG2 ETS1 AMOT CTGF PC IL1B JMY SLIT1 PTK2B S100P ITGA5 APOB CCR4 MNX1 CDK5R1
LLA	Processes	48870	cell motility		6.1836e-06	0.00030128	21/287 7.3%	242/9984 2.4%	VAV3 DNAH3 CXCL8 NOS3 ARID5B MSN PSG2 ETS1 AMOT CTGF PC IL1B JMY SLIT1 PTK2B S100P ITGA5 APOB CCR4 MNX1 CDK5R1
LLA	Processes	30308	negative regulation of cell growth		6.5461e-06	0.00031314	12/287 4.1%	87/9984 0.8%	CYP27B1 CDKN1B BCL6 DCUN1D3 SEMA3A JADE1 SLIT1 APBB2 INHBA HSPA1B TP73 HSPA1A
LLA	Processes	6950	response to stress		6.7768e-06	0.00031839	64/287 22.2%	1295/9984 12.9%	CXCL8 CITED2 SERPINE1 JADE1 TNC AHR CTGF IFIH1 CDH3 FADS6 PLAU SESN1 ITGB6 CCR4 EDN1 SERPINB2 RSAD2 VWF SPHK1 ITGA2 PLAUR TICAM1 NGF F3 EREG TLR1 ERN2 LOX IL1B IFNK ANGPTL4 HAP1 ITGA5 TRIB1 PTGS1 CYP27B1 IL1RL1 NUAK2 PTK2B S1PR3 STX3 DUOX2 PRNP HSPA1L GADD45A TGFB3 NOS3 HSPA6 IFNLR1 GRHL3 INHBA DHRS2 SOD3 FOSL1 CDK7 BCL6 DNAJA4 JMY CYP1A1 LCN2 ERCC5 HSPA1B TP73 HSPA1A
LLA	Processes	50819	negative regulation of coagulation		7.4286e-06	0.00034289	6/287 2.0%	18/9984 0.1%	EDN1 PC SERPINE2 PLAU NOS3 SERPINE1
LLA	Processes	50793	regulation of developmental process		9.1851e-06	0.00041666	36/287 12.5%	579/9984 5.7%	FLG SERPINE2 FBLIM1 TGFB1I1 AMIGO1 SEMA3A SERPINE1 ETS1 PTHLH AMOT CYP27B1 PALMD FADS6 SLIT1 SOX9 APOB S1PR5 ZNF488 EDN1 TGFB3 NOS3 SPHK1 FST WNT9A INHBA NGF F3 EREG RHOB PIAS1 BCL6 IL1B CDC42EP2 ANGPTL4 FERMT2 CDK5R1
LLA	Processes	42060	wound healing	x	1.0102e-05	0.00044368	14/287 4.8%	122/9984 1.2%	SERPINB2 VWF TGFB3 ITGA2 PLAUR IFNLR1 GRHL3 F3 EREG CDH3 LOX PLAU IL1B ITGA5
LLA	Processes	9611	response to wounding	x	1.0287e-05	0.00044368	17/287 5.9%	174/9984 1.7%	SERPINB2 VWF TGFB3 ITGA2 TNC PLAUR IFNLR1 GRHL3 F3 EREG CTGF CDH3 LOX PLAU IL1B CYP1A1 ITGA5
LLA	Processes	35295	tube development		1.0403e-05	0.00044368	26/287 9.0%	354/9984 3.5%	FLG CXCL8 CITED2 AMOT CTGF ZFP36L1 PLAU GJA5 PTK2B APOB MNX1 TGM2 VASP VAV3 EDN1 TGFB3 NOS3 FOXL1 EREG KLF5 PC LOX CYP1A1 ITGA5 LGR4 TP73
LLA	Processes	1903035	negative regulation of response to wounding	x	1.0597e-05	0.00044368	6/287 2.0%	19/9984 0.1%	EDN1 PC SERPINE2 PLAU NOS3 SERPINE1
LLA	Processes	50818	regulation of coagulation		1.0624e-05	0.00044368	7/287 2.4%	28/9984 0.2%	EDN1 PC SERPINE2 PLAU NOS3 SERPINE1 F3
LLA	Processes	23052	signaling		1.0796e-05	0.00044382	93/287 32.4%	2156/9984 21.5%	GPSM2 CXCL8 ZFYVE9 TGFB1I1 RASEF TNC FHL2 RND3 CTGF AKAP12 SMPD3 RAB43 SYDE2 FRAT2 FADS6 PLAU GJA5 TAGAP PLCE1 ITGB6 EPHB3 TGM2 DUSP4 VAV3 PPP1R16B CARD10 EDN1 SPHK1 FST ITGA2 PLAUR PPP2R5B ARID5B ANK3 WNT9A FOXL1 OSMR TICAM1 NGF F3 RAB33A EREG RHOB PIAS1 TLR1 ARL4A IL1B RASA2 SCG5 IFNK ANGPTL4 ARHGEF2 HAP1 ERG ITGA5 TRIB1 MET TNFRSF21 HBEGF FLG PTGER4 TNXB TACSTD2 DAPP1 CSF2RB PTHLH IL1RL1 P2RY6…
LLA	Processes	48585	negative regulation of response to stimulus		1.1277e-05	0.00045648	24/287 8.3%	313/9984 3.1%	PTPN1 EDN1 SERPINE2 TGFB3 NOS3 TGFB1I1 FST SEMA3A SERPINE1 SPRY4 TNFAIP3 IL1RL1 RGS2 CYP26B1 SOCS1 PC CHST11 BCL6 PLAU IL1B SLIT1 RGS20 TRIB1 TP73
LLA	Processes	51716	cellular response to stimulus		1.1539e-05	0.00045999	102/287 35.5%	2434/9984 24.3%	ZFYVE9 SERPINE1 RASEF TNC CTGF RAB43 SYDE2 FRAT2 FADS6 PLAU SESN1 PLCE1 EPHB3 TGM2 PPP1R16B CARD10 FST ARID5B ANK3 TICAM1 EREG PIAS1 SCG5 ERG TRIB1 FLG TACSTD2 DAPP1 CSF2RB NUAK2 SOCS1 STK38L TNFSF14 GADD45A TGFB3 INHBA CORO2A EXT1 FOSL1 NET1 RCAN1 CDK7 BCL6 ARTN JMY CYP1A1 TP73 GPSM2 CXCL8 TGFB1I1 FHL2 RND3 AKAP12 TAGAP ITGB6 DUSP4 VAV3 EDN1 SPHK1 ITGA2 PLAUR PPP2R5B WNT9A OSMR NGF F3 RAB33A RHO…
LLA	Processes	51094	positive regulation of developmental process		1.2171e-05	0.00047793	22/287 7.6%	273/9984 2.7%	FLG EDN1 SERPINE2 TGFB3 NOS3 TGFB1I1 SPHK1 AMIGO1 FST SERPINE1 INHBA NGF F3 ETS1 RHOB AMOT PIAS1 CYP27B1 IL1B ANGPTL4 APOB ZNF488
LLA	Processes	2000026	regulation of multicellular organismal development		1.3233e-05	0.00051198	24/287 8.3%	316/9984 3.1%	FLG SERPINE2 TGFB3 NOS3 SPHK1 AMIGO1 FST SEMA3A SERPINE1 WNT9A INHBA NGF F3 ETS1 PTHLH RHOB AMOT CYP27B1 BCL6 IL1B SLIT1 SOX9 ANGPTL4 ZNF488
LLA	Processes	48519	negative regulation of biological process		1.4455e-05	0.00055117	75/287 26.1%	1638/9984 16.4%	CDKN1B CXCL8 SERPINE2 CITED2 TGFB1I1 SERPINE1 JADE1 TNFAIP3 PRDM1 ETS1 AMOT RGS2 CYP26B1 PLAU SESN1 SOX9 JARID2 IER3 EDN1 SERPINB2 KRT4 SPHK1 FST ARID5B WNT9A OVOL1 NGF F3 EREG RHOB PIAS1 ERN2 IL1B IFNK ANGPTL4 ARHGEF2 IRF6 TRIB1 VCL HBEGF FLG BCL2A1 DCUN1D3 SEMA3A PTHLH PTGS1 ZFP36L1 CYP27B1 IL1RL1 NUAK2 SOCS1 CHST11 BAG3 SLIT1 PTK2B RGS20 APBB2 PRNP PTPN1 GADD45A TGFB3 NOS3 SPRY4 IFNLR1 INHBA D…
LLA	Processes	7165	signal transduction		1.4903e-05	0.00056015	88/287 30.6%	2022/9984 20.2%	GPSM2 CXCL8 ZFYVE9 TGFB1I1 RASEF TNC FHL2 RND3 CTGF AKAP12 RAB43 SYDE2 FRAT2 PLAU TAGAP PLCE1 ITGB6 EPHB3 TGM2 DUSP4 VAV3 PPP1R16B CARD10 EDN1 SPHK1 FST ITGA2 PLAUR PPP2R5B ARID5B ANK3 WNT9A OSMR TICAM1 NGF F3 RAB33A EREG RHOB PIAS1 TLR1 ARL4A IL1B RASA2 SCG5 IFNK ANGPTL4 ARHGEF2 ERG ITGA5 TRIB1 MET TNFRSF21 HBEGF FLG PTGER4 TNXB TACSTD2 DAPP1 CSF2RB PTHLH IL1RL1 P2RY6 SOCS1 RASSF10 SLIT1 STK38L …
LLA	Processes	7154	cell communication		1.5126e-05	0.00056053	95/287 33.1%	2234/9984 22.3%	GPSM2 CXCL8 ZFYVE9 TGFB1I1 RASEF TNC FHL2 RND3 CTGF AKAP12 SMPD3 RAB43 SYDE2 FRAT2 FADS6 PLAU GJA5 TAGAP PLCE1 ITGB6 EPHB3 TGM2 DUSP4 VAV3 PPP1R16B CARD10 EDN1 SPHK1 FST ITGA2 PLAUR PPP2R5B ARID5B ANK3 WNT9A FOXL1 OSMR TICAM1 NGF F3 RAB33A EREG RHOB PIAS1 TLR1 ARL4A IL1B RASA2 SCG5 IFNK ANGPTL4 ARHGEF2 HAP1 ERG ITGA5 TRIB1 MET TNFRSF21 HBEGF FLG PTGER4 TNXB TACSTD2 DAPP1 CSF2RB PTHLH IL1RL1 P2RY6…
LLA	Processes	60429	epithelium development	x	1.7002e-05	0.00061817	26/287 9.0%	364/9984 3.6%	FLG CLIC5 EHF TGFB1I1 SEMA3A TNC GJA5 SOX9 MNX1 TGM2 VASP EDN1 KRT4 FEM1B FST ITGA2 EMP1 INHBA LOR EREG ALDH1A3 PC CYP1A1 IRF6 ITGA5 VCL
LLA	Processes	45766	positive regulation of angiogenesis		1.7387e-05	0.00061817	7/287 2.4%	30/9984 0.3%	NOS3 SPHK1 IL1B SERPINE1 ANGPTL4 F3 RHOB
LLA	Processes	1904018	positive regulation of vasculature development		1.7387e-05	0.00061817	7/287 2.4%	30/9984 0.3%	NOS3 SPHK1 IL1B SERPINE1 ANGPTL4 F3 RHOB
LLA	Processes	30334	regulation of cell migration		1.912e-05	0.00067073	16/287 5.5%	164/9984 1.6%	EDN1 SERPINE2 CITED2 SPHK1 ITGA2 SEMA3A SERPINE1 F3 AMOT P2RY6 PC PLAU PTK2B TRIB1 VCL HBEGF
LLA	Processes	2237	response to molecule of bacterial origin		2.2622e-05	0.00078314	12/287 4.1%	98/9984 0.9%	TLR1 CYP27B1 SOCS1 NOS3 IL1B SERPINE1 CYP1A1 PELI1 TRIB1 TICAM1 NGF F3
LLA	Processes	80134	regulation of response to stress		2.3024e-05	0.00078671	18/287 6.2%	204/9984 2.0%	EDN1 SERPINE2 NOS3 ITGA2 SERPINE1 IFNLR1 OSMR F3 SH3RF1 EREG PC BCL6 PLAU IL1B IFNK TP73 HBEGF TGM2
LLA	Processes	2000145	regulation of cell motility		2.3982e-05	0.00080892	16/287 5.5%	167/9984 1.6%	EDN1 SERPINE2 CITED2 SPHK1 ITGA2 SEMA3A SERPINE1 F3 AMOT P2RY6 PC PLAU PTK2B TRIB1 VCL HBEGF
LLA	Processes	22414	reproductive process		2.8011e-05	0.00093287	35/287 12.1%	585/9984 5.8%	CLIC5 CITED2 TNC AHR PRDM1 PTHLH CYP27B1 RGS2 CYP26B1 PLAU SLIT1 PTK2B SOX9 APOB VWF TGFB3 FEM1B NOS3 SPHK1 FST PSG2 INHBA OVOL1 EREG PIAS1 FOSL1 PSG5 BCL6 IL1B KLF9 CYP1A1 ACSBG1 MAMLD1 LGR4 ZSCAN2
LLA	Processes	3	reproduction		2.903e-05	0.00095471	35/287 12.1%	586/9984 5.8%	CLIC5 CITED2 TNC AHR PRDM1 PTHLH CYP27B1 RGS2 CYP26B1 PLAU SLIT1 PTK2B SOX9 APOB VWF TGFB3 FEM1B NOS3 SPHK1 FST PSG2 INHBA OVOL1 EREG PIAS1 FOSL1 PSG5 BCL6 IL1B KLF9 CYP1A1 ACSBG1 MAMLD1 LGR4 ZSCAN2
LLA	Processes	10033	response to organic substance		3.3225e-05	0.0010766	45/287 15.6%	843/9984 8.4%	FLG ZFYVE9 TGFB1I1 SERPINE1 FHL2 PTGS1 CTGF CYP27B1 SOCS1 FADS6 SLIT1 PTK2B APOB DUOX2 DUSP4 HSPA1L TGFB3 NOS3 SPHK1 FST ITGA2 HSPA6 MMP3 WNT9A OSMR TICAM1 NGF F3 EREG PIAS1 FOSL1 TLR1 CDK7 LOX IL1B CLCF1 KLF9 CYP1A1 PELI1 IFNK ACSBG1 TRIB1 HSPA1B CDK5R1 HSPA1A
LLA	Processes	51272	positive regulation of cellular component movement	x	3.3964e-05	0.0010766	12/287 4.1%	102/9984 1.0%	EDN1 P2RY6 PC BCL6 SPHK1 ITGA2 SERPINE1 PTK2B F3 ETS1 HBEGF AMOT
LLA	Processes	40017	positive regulation of locomotion		3.3964e-05	0.0010766	12/287 4.1%	102/9984 1.0%	EDN1 P2RY6 CXCL8 PC SPHK1 ITGA2 SERPINE1 PTK2B CCR4 F3 HBEGF AMOT
LLA	Processes	48584	positive regulation of response to stimulus		3.8156e-05	0.0011951	28/287 9.7%	427/9984 4.2%	FLG CXCL8 CITED2 TGFB1I1 SERPINE1 TGFA AKAP12 CYP27B1 PTK2B CCR4 TGM2 EDN1 TNFSF14 TGFB3 PLK2 SPHK1 ITGA2 OSMR TICAM1 F3 EREG P2RX2 IL1B REL PELI1 IFNK ITGA5 HBEGF
LLA	Processes	22603	regulation of anatomical structure morphogenesis		4.1024e-05	0.0012698	18/287 6.2%	213/9984 2.1%	FLG FBLIM1 NOS3 SPHK1 AMIGO1 SEMA3A SERPINE1 NGF F3 RHOB AMOT BCL6 PALMD IL1B CDC42EP2 SLIT1 ANGPTL4 FERMT2
LLA	Processes	40008	regulation of growth		4.2951e-05	0.001314	21/287 7.3%	275/9984 2.7%	FLG CDKN1B DCUN1D3 SPHK1 SEMA3A JADE1 INHBA NGF CTGF NET1 CYP27B1 SOCS1 BCL6 SLIT1 PLCE1 PTK2B APBB2 HSPA1B TP73 HBEGF HSPA1A
LLA	Processes	45926	negative regulation of growth		4.5442e-05	0.0013611	12/287 4.1%	105/9984 1.0%	CYP27B1 CDKN1B BCL6 DCUN1D3 SEMA3A JADE1 SLIT1 APBB2 INHBA HSPA1B TP73 HSPA1A
LLA	Processes	32496	response to lipopolysaccharide		4.5526e-05	0.0013611	11/287 3.8%	89/9984 0.8%	CYP27B1 SOCS1 NOS3 IL1B SERPINE1 CYP1A1 PELI1 TRIB1 TICAM1 NGF F3
LLA	Processes	1902531	regulation of intracellular signal transduction		4.8884e-05	0.0014451	28/287 9.7%	433/9984 4.3%	FLG TNFAIP3 SH3RF1 AKAP12 IL1RL1 PLCE1 PTK2B MCF2L2 ARFGEF3 TGM2 VAV3 EDN1 TNFSF14 PLK2 SPHK1 SPRY4 TICAM1 F3 NET1 BCL6 P2RX2 IL1B RASA2 REL PELI1 ARHGEF2 TP73 HBEGF
LLA	Processes	10647	positive regulation of cell communication		5.0479e-05	0.0014757	24/287 8.3%	343/9984 3.4%	FLG EDN1 TNFSF14 CITED2 TGFB3 PLK2 TGFB1I1 SPHK1 ITGA2 TGFA INHBA TICAM1 F3 EREG AKAP12 CYP27B1 P2RX2 IL1B REL PELI1 PTK2B ITGA5 HBEGF TGM2
LLA	Processes	32879	regulation of localization		5.7206e-05	0.0016534	30/287 10.4%	484/9984 4.8%	SERPINE2 CITED2 SEMA3A SERPINE1 TNC ETS1 PTGS1 AMOT P2RY6 PLAU PTK2B APOB EDN1 TGFB3 NOS3 SPHK1 FST ITGA2 INHBA NGF F3 EHD4 PC BCL6 P2RX2 IL1B SCG5 TRIB1 VCL HBEGF
LLA	Processes	44703	multi-organism reproductive process		5.7817e-05	0.0016534	26/287 9.0%	391/9984 3.9%	CLIC5 CITED2 PRDM1 PTHLH CYP27B1 RGS2 CYP26B1 PLAU PTK2B SOX9 APOB TGFB3 NOS3 SPHK1 FST PSG2 OVOL1 EREG PIAS1 FOSL1 PSG5 BCL6 IL1B KLF9 CYP1A1 ZSCAN2
LLA	Processes	7166	cell surface receptor signaling pathway		6.008e-05	0.0016985	36/287 12.5%	632/9984 6.3%	FLG ZFYVE9 TGFB1I1 TACSTD2 CTGF FRAT2 SOCS1 SLIT1 PLCE1 PTK2B ITGB6 DUOX2 EPHB3 VAV3 EDN1 TGFB3 NOS3 FST ITGA2 ARID5B WNT9A INHBA OSMR TICAM1 NGF MERTK F3 EREG PIAS1 IL1B CLCF1 IFNK ITGA5 MET HBEGF CDK5R1
LLA	Processes	23056	positive regulation of signaling		6.0684e-05	0.0016985	24/287 8.3%	347/9984 3.4%	FLG EDN1 TNFSF14 CITED2 TGFB3 PLK2 TGFB1I1 SPHK1 ITGA2 TGFA INHBA TICAM1 F3 EREG AKAP12 CYP27B1 P2RX2 IL1B REL PELI1 PTK2B ITGA5 HBEGF TGM2
LLA	Processes	48522	positive regulation of cellular process		6.2126e-05	0.0017206	66/287 22.9%	1446/9984 14.4%	EHF SERPINE2 CITED2 TGFB1I1 SERPINE1 FHL2 AHR ETS1 AMOT CTGF AKAP12 SOX9 JARID2 ZNF488 TGM2 VAV3 CARD10 EDN1 SPHK1 ITGA2 OSMR TICAM1 NGF F3 EREG PIAS1 ALDH1A3 ELF4 IL1B IRF1 CDC42EP2 PELI1 IRF6 ITGA5 TRIB1 HBEGF FLG DCUN1D3 AMIGO1 TGFA PTHLH ZFP36L1 CYP27B1 P2RY6 PTK2B S1PR3 APOB COL26A1 EGR4 TNFSF14 TGFB3 NOS3 PLK2 GRHL3 INHBA FOSL1 CDK7 KLF5 PC BCL6 P2RX2 CLCF1 JMY REL TP73 CDK5R1
LLA	Processes	51130	positive regulation of cellular component organization	x	6.4052e-05	0.0017554	15/287 5.2%	162/9984 1.6%	EDN1 TGFB3 SPHK1 AMIGO1 ITGA2 SERPINE1 TGFA AHR NGF EREG AMOT IL1B JMY CDC42EP2 JARID2
LLA	Processes	51704	multi-organism process		7.1434e-05	0.0019376	26/287 9.0%	396/9984 3.9%	CLIC5 CITED2 PRDM1 PTHLH CYP27B1 RGS2 CYP26B1 PLAU PTK2B SOX9 APOB TGFB3 NOS3 SPHK1 FST PSG2 OVOL1 EREG PIAS1 FOSL1 PSG5 BCL6 IL1B KLF9 CYP1A1 ZSCAN2
LLA	Processes	34405	response to fluid shear stress		7.5177e-05	0.0020183	4/287 1.3%	9/9984 0.0%	CITED2 TGFB3 NOS3 F3
LLA	Processes	45933	positive regulation of muscle contraction		8.8285e-05	0.0023463	5/287 1.7%	17/9984 0.1%	EDN1 SPHK1 ITGA2 PTGS1 CTGF
LLA	Processes	32102	negative regulation of response to external stimulus		9.2025e-05	0.0024212	9/287 3.1%	65/9984 0.6%	EDN1 PC SERPINE2 PLAU NOS3 SEMA3A SERPINE1 SLIT1 TRIB1
LLA	Processes	1568	blood vessel development		9.5769e-05	0.0024947	17/287 5.9%	207/9984 2.0%	FLG VAV3 EDN1 CXCL8 CITED2 SPHK1 EREG AMOT CTGF ZFP36L1 KLF5 LOX PLAU GJA5 PTK2B ITGA5 APOB
LLA	Processes	32103	positive regulation of response to external stimulus		0.00010191	0.0026167	10/287 3.4%	81/9984 0.8%	CXCL8 IL1B ITGA2 SERPINE1 IFNK OSMR CCR4 F3 EREG TGM2
LLA	Processes	9967	positive regulation of signal transduction		0.00010244	0.0026167	22/287 7.6%	314/9984 3.1%	FLG EDN1 TNFSF14 CITED2 TGFB3 PLK2 TGFB1I1 SPHK1 TGFA TICAM1 F3 EREG AKAP12 CYP27B1 P2RX2 IL1B REL PELI1 PTK2B ITGA5 HBEGF TGM2
LLA	Processes	48513	animal organ development		0.00011425	0.0028902	53/287 18.4%	1106/9984 11.0%	CLIC5 CITED2 TNC AHR PRDM1 CTGF ZNF408 GJA5 PLCE1 SOX9 JARID2 MNX1 HIST1H1B TGM2 EDN1 VWF SPHK1 FST ITGA2 ARID5B WNT9A FOXL1 LOR EREG ALDH1A3 LOX IRF1 ACSBG1 HAP1 IRF6 HBEGF FLG TAGLN SEMA3A CYP27B1 SOCS1 CHST11 NHS SLIT1 TGFB3 FEM1B NOS3 INHBA DHRS2 EXT1 RCAN1 BCL6 CLCF1 CYP1A1 MAMLD1 LGR4 TP73 CDK5R1
LLA	Processes	8283	cell population proliferation		0.00011579	0.0029013	23/287 8.0%	339/9984 3.3%	EHF TNFSF14 CITED2 FST ITGA2 TACSTD2 TGFA EMP1 OSMR EREG CDK7 FRAT2 ARTN ELF4 CYP1A1 PLCE1 PTK2B SOX9 ERG IRF6 MET LGR4 CDK5R1
LLA	Processes	19220	regulation of phosphate metabolic process		0.00011767	0.0029207	25/287 8.7%	385/9984 3.8%	CDKN1B TGFA CTGF SOCS1 PLCE1 PTK2B VAV3 CARD10 EDN1 GADD45A TGFB3 NOS3 SPHK1 ITGA2 SPRY4 INHBA EREG RCAN1 CDK7 IL1B CLCF1 ITGA5 TRIB1 TP73 CDK5R1
LLA	Processes	51174	regulation of phosphorus metabolic process		0.0001226	0.0030145	25/287 8.7%	386/9984 3.8%	CDKN1B TGFA CTGF SOCS1 PLCE1 PTK2B VAV3 CARD10 EDN1 GADD45A TGFB3 NOS3 SPHK1 ITGA2 SPRY4 INHBA EREG RCAN1 CDK7 IL1B CLCF1 ITGA5 TRIB1 TP73 CDK5R1
LLA	Processes	42330	taxis		0.00012737	0.0030743	14/287 4.8%	153/9984 1.5%	VASP CXCL8 SEMA3A PLAUR AMOT EXT1 FOSL1 PLAU IL1B SLIT1 CCR4 MNX1 EPHB3 CDK5R1
LLA	Processes	6935	chemotaxis		0.00012737	0.0030743	14/287 4.8%	153/9984 1.5%	VASP CXCL8 SEMA3A PLAUR AMOT EXT1 FOSL1 PLAU IL1B SLIT1 CCR4 MNX1 EPHB3 CDK5R1
LLA	Processes	44057	regulation of system process		0.00013134	0.0031414	12/287 4.1%	117/9984 1.1%	EDN1 NOS3 SPHK1 FST ITGA2 SEMA3A TNC PLCE1 INHBA HBEGF PTGS1 CTGF
LLA	Processes	1944	vasculature development		0.00013593	0.003222	17/287 5.9%	213/9984 2.1%	FLG VAV3 EDN1 CXCL8 CITED2 SPHK1 EREG AMOT CTGF ZFP36L1 KLF5 LOX PLAU GJA5 PTK2B ITGA5 APOB
LLA	Processes	9607	response to biotic stimulus		0.0001411	0.0033146	22/287 7.6%	321/9984 3.2%	RSAD2 NOS3 SERPINE1 TICAM1 NGF F3 FOSL1 IFIH1 TLR1 CYP27B1 IL1RL1 SOCS1 IL1B CYP1A1 PELI1 LCN2 IFNK TRIB1 APOB CCR4 DUOX2 TP73
LLA	Processes	43207	response to external biotic stimulus		0.00014924	0.0034335	21/287 7.3%	300/9984 3.0%	RSAD2 NOS3 SERPINE1 TICAM1 NGF F3 FOSL1 IFIH1 TLR1 CYP27B1 IL1RL1 SOCS1 IL1B CYP1A1 PELI1 LCN2 IFNK TRIB1 APOB CCR4 DUOX2
LLA	Processes	51707	response to other organism		0.00014924	0.0034335	21/287 7.3%	300/9984 3.0%	RSAD2 NOS3 SERPINE1 TICAM1 NGF F3 FOSL1 IFIH1 TLR1 CYP27B1 IL1RL1 SOCS1 IL1B CYP1A1 PELI1 LCN2 IFNK TRIB1 APOB CCR4 DUOX2
LLA	Processes	31399	regulation of protein modification process		0.00015008	0.0034335	25/287 8.7%	391/9984 3.9%	CDKN1B TGFA CTGF SOCS1 PLCE1 PTK2B JARID2 CARD10 EDN1 GADD45A TGFB3 SPHK1 SPRY4 TICAM1 EREG PIAS1 RCAN1 CDK7 IL1B CLCF1 PELI1 ITGA5 TRIB1 TP73 CDK5R1
LLA	Processes	51241	negative regulation of multicellular organismal process		0.00015227	0.0034493	17/287 5.9%	215/9984 2.1%	EDN1 SERPINE2 NOS3 FST SEMA3A SERPINE1 WNT9A INHBA PTHLH AMOT PC BCL6 PLAU IL1B SLIT1 PTK2B SOX9
LLA	Processes	51726	regulation of cell cycle		0.00015339	0.0034493	26/287 9.0%	415/9984 4.1%	CDKN1B CXCL8 CITED2 TGFA ETS1 CTGF SESN3 SESN1 APBB2 PRNP EDN1 GADD45A SPHK1 WNT9A INHBA NGF EREG RHOB FOSL1 ERN2 CDK7 IL1B JMY IRF6 TP73 CDK5R1
LLA	Processes	45595	regulation of cell differentiation		0.00016408	0.0036551	24/287 8.3%	370/9984 3.7%	FLG EDN1 SERPINE2 TGFB3 TGFB1I1 AMIGO1 FST SEMA3A WNT9A INHBA NGF ETS1 PTHLH EREG PIAS1 CYP27B1 BCL6 FADS6 SLIT1 SOX9 APOB S1PR5 ZNF488 CDK5R1
LLA	Processes	34097	response to cytokine		0.00016532	0.0036551	13/287 4.5%	138/9984 1.3%	NOS3 SPHK1 SERPINE1 MMP3 OSMR EREG FOSL1 CYP27B1 SOCS1 IL1B CLCF1 IFNK DUOX2
LLA	Processes	9617	response to bacterium		0.00019101	0.0041879	13/287 4.5%	140/9984 1.4%	NOS3 SERPINE1 TICAM1 NGF F3 TLR1 CYP27B1 SOCS1 IL1B CYP1A1 PELI1 TRIB1 CCR4
LLA	Processes	65008	regulation of biological quality		0.00020424	0.0044411	49/287 17.0%	1020/9984 10.2%	SERPINE2 SERPINE1 TNC AMOT SMPD3 CYP26B1 PLAU LIPH PLCE1 CCR4 TGM2 EDN1 VWF SPHK1 FST ITGA2 PLAUR NGF F3 ALDH1A3 IL1B CDC42EP2 SCG5 ANGPTL4 HAP1 FBLIM1 SEMA3A PTGS1 ZFP36L1 CYP27B1 PALMD SLIT1 PTK2B S1PR3 APOB DUOX2 PRNP TNFSF14 NOS3 IFNLR1 INHBA DHRS2 PC BCL6 P2RX2 JMY CYP1A1 FERMT2 TP73
LLA	Processes	61458	reproductive system development		0.00020777	0.0044442	16/287 5.5%	200/9984 2.0%	VWF CITED2 FEM1B NOS3 FST TNC AHR PRDM1 INHBA EREG CYP27B1 SLIT1 ACSBG1 SOX9 MAMLD1 LGR4
LLA	Processes	48608	reproductive structure development		0.00020777	0.0044442	16/287 5.5%	200/9984 2.0%	VWF CITED2 FEM1B NOS3 FST TNC AHR PRDM1 INHBA EREG CYP27B1 SLIT1 ACSBG1 SOX9 MAMLD1 LGR4
LLA	Processes	16477	cell migration		0.00021202	0.0044985	17/287 5.9%	221/9984 2.2%	VAV3 CXCL8 NOS3 ARID5B MSN PSG2 AMOT CTGF PC IL1B SLIT1 PTK2B S100P ITGA5 CCR4 MNX1 CDK5R1
LLA	Processes	10817	regulation of hormone levels		0.00022006	0.0045932	13/287 4.5%	142/9984 1.4%	EDN1 FST INHBA NGF DHRS2 SMPD3 CYP27B1 ALDH1A3 CYP26B1 IL1B CYP1A1 SCG5 DUOX2
LLA	Processes	45793	positive regulation of cell size		0.00022521	0.0045932	3/287 1.0%	5/9984 0.0%	EDN1 TP73 AMOT
LLA	Processes	46461	neutral lipid catabolic process		0.00022521	0.0045932	3/287 1.0%	5/9984 0.0%	LIPH PNPLA3 APOB
LLA	Processes	46464	acylglycerol catabolic process		0.00022521	0.0045932	3/287 1.0%	5/9984 0.0%	LIPH PNPLA3 APOB
LLA	Processes	19433	triglyceride catabolic process		0.00022521	0.0045932	3/287 1.0%	5/9984 0.0%	LIPH PNPLA3 APOB
LLA	Processes	9725	response to hormone		0.00022866	0.0046278	23/287 8.0%	355/9984 3.5%	TGFB3 NOS3 TGFB1I1 SPHK1 ITGA2 SERPINE1 FHL2 NGF EREG PTGS1 CTGF PIAS1 FOSL1 CYP27B1 CDK7 SOCS1 LOX FADS6 IL1B KLF9 SLIT1 PTK2B ACSBG1
LLA	Processes	70887	cellular response to chemical stimulus		0.00024151	0.0048505	29/287 10.1%	500/9984 5.0%	FLG CXCL8 ZFYVE9 TGFB1I1 SERPINE1 FHL2 CTGF SOCS1 SLIT1 STX3 DUOX2 TGFB3 NOS3 SPHK1 FST ITGA2 WNT9A TICAM1 F3 DHRS2 EREG PIAS1 CDK7 IL1B CLCF1 KLF9 CYP1A1 IFNK CDK5R1
LLA	Processes	90257	regulation of muscle system process		0.00026239	0.0051519	8/287 2.7%	59/9984 0.5%	EDN1 NOS3 SPHK1 ITGA2 TNC PLCE1 PTGS1 CTGF
LLA	Processes	45765	regulation of angiogenesis		0.00026239	0.0051519	8/287 2.7%	59/9984 0.5%	NOS3 SPHK1 IL1B SERPINE1 ANGPTL4 F3 RHOB AMOT
LLA	Processes	1901342	regulation of vasculature development		0.00026239	0.0051519	8/287 2.7%	59/9984 0.5%	NOS3 SPHK1 IL1B SERPINE1 ANGPTL4 F3 RHOB AMOT
LLA	Processes	9719	response to endogenous stimulus		0.0002674	0.0051836	27/287 9.4%	454/9984 4.5%	FLG ZFYVE9 TGFB1I1 SERPINE1 FHL2 PTGS1 CTGF CYP27B1 SOCS1 FADS6 SLIT1 PTK2B TGFB3 NOS3 SPHK1 FST ITGA2 NGF F3 EREG PIAS1 FOSL1 CDK7 LOX IL1B KLF9 ACSBG1
LLA	Processes	50920	regulation of chemotaxis		0.00026795	0.0051836	7/287 2.4%	45/9984 0.4%	CXCL8 ITGA2 SEMA3A SERPINE1 SLIT1 CCR4 F3
LLA	Processes	48468	cell development		0.00029983	0.005758	26/287 9.0%	433/9984 4.3%	FLG CLIC5 AMIGO1 ATL1 SEMA3A ACTB CHST11 SLIT1 PTK2B SOX9 STX3 ZNF488 MNX1 EPHB3 VASP EDN1 FEM1B NOS3 NGF EREG EXT1 RCAN1 BCL6 IRF6 TP73 CDK5R1
LLA	Processes	2000147	positive regulation of cell motility		0.00032376	0.0061282	10/287 3.4%	93/9984 0.9%	EDN1 P2RY6 PC SPHK1 ITGA2 SERPINE1 PTK2B F3 HBEGF AMOT
LLA	Processes	30335	positive regulation of cell migration		0.00032376	0.0061282	10/287 3.4%	93/9984 0.9%	EDN1 P2RY6 PC SPHK1 ITGA2 SERPINE1 PTK2B F3 HBEGF AMOT
LLA	Processes	7155	cell adhesion	x	0.00034568	0.0064964	26/287 9.0%	437/9984 4.3%	TNXB FBLIM1 TGFB1I1 AMIGO1 TNC LAMC2 PCDH19 CLDN1 RND3 CTGF CDH3 PTK2B ANXA9 ITGB6 VWF LAMB3 ITGA2 MSN F3 RHOB CLDN4 ZYX ITGA5 FERMT2 VCL CDK5R1
LLA	Processes	50878	regulation of body fluid levels		0.00035454	0.0066156	12/287 4.1%	130/9984 1.3%	EDN1 PC SERPINE2 VWF PLAU NOS3 ITGA2 SERPINE1 PLAUR IFNLR1 F3 TP73
LLA	Processes	48514	blood vessel morphogenesis		0.00038329	0.0070657	14/287 4.8%	170/9984 1.7%	FLG VAV3 EDN1 CXCL8 CITED2 EREG AMOT CTGF ZFP36L1 KLF5 PLAU PTK2B ITGA5 APOB
LLA	Processes	22610	biological adhesion	x	0.00038404	0.0070657	26/287 9.0%	440/9984 4.4%	TNXB FBLIM1 TGFB1I1 AMIGO1 TNC LAMC2 PCDH19 CLDN1 RND3 CTGF CDH3 PTK2B ANXA9 ITGB6 VWF LAMB3 ITGA2 MSN F3 RHOB CLDN4 ZYX ITGA5 FERMT2 VCL CDK5R1
LLA	Processes	45987	positive regulation of smooth muscle contraction		0.0003894	0.0071146	4/287 1.3%	13/9984 0.1%	EDN1 SPHK1 ITGA2 PTGS1
LLA	Processes	10648	negative regulation of cell communication		0.00039757	0.0072138	19/287 6.6%	277/9984 2.7%	PTPN1 EDN1 TGFB3 TGFB1I1 FST SPRY4 TNFAIP3 INHBA IL1RL1 RGS2 CYP26B1 SOCS1 CHST11 BCL6 IL1B SLIT1 RGS20 TRIB1 TP73
LLA	Processes	31349	positive regulation of defense response		0.00040391	0.0072788	7/287 2.4%	48/9984 0.4%	IL1B ITGA2 SERPINE1 IFNK OSMR EREG TGM2
LLA	Processes	23057	negative regulation of signaling		0.00041583	0.0074425	19/287 6.6%	278/9984 2.7%	PTPN1 EDN1 TGFB3 TGFB1I1 FST SPRY4 TNFAIP3 INHBA IL1RL1 RGS2 CYP26B1 SOCS1 CHST11 BCL6 IL1B SLIT1 RGS20 TRIB1 TP73
LLA	Processes	31175	neuron projection development		0.00042126	0.0074488	15/287 5.2%	192/9984 1.9%	FLG VASP CLIC5 AMIGO1 ATL1 SEMA3A NGF ACTB EXT1 SLIT1 PTK2B STX3 MNX1 EPHB3 CDK5R1
LLA	Processes	42325	regulation of phosphorylation		0.00042184	0.0074488	22/287 7.6%	347/9984 3.4%	VAV3 CARD10 EDN1 CDKN1B GADD45A TGFB3 SPHK1 SPRY4 TGFA INHBA EREG CTGF CDK7 SOCS1 IL1B CLCF1 PLCE1 PTK2B ITGA5 TRIB1 TP73 CDK5R1
LLA	Processes	46503	glycerolipid catabolic process		0.00044083	0.0076305	3/287 1.0%	6/9984 0.0%	LIPH PNPLA3 APOB
LLA	Processes	32331	negative regulation of chondrocyte differentiation		0.00044083	0.0076305	3/287 1.0%	6/9984 0.0%	SOX9 WNT9A PTHLH
LLA	Processes	61037	negative regulation of cartilage development		0.00044083	0.0076305	3/287 1.0%	6/9984 0.0%	SOX9 WNT9A PTHLH
LLA	Processes	30855	epithelial cell differentiation	x	0.00045687	0.0078563	13/287 4.5%	153/9984 1.5%	FLG CLIC5 EHF KRT4 FEM1B TGFB1I1 ITGA2 EMP1 LOR EREG CYP1A1 SOX9 IRF6
LLA	Processes	6940	regulation of smooth muscle contraction		0.00051406	0.0087824	5/287 1.7%	24/9984 0.2%	EDN1 SPHK1 ITGA2 PLCE1 PTGS1
LLA	Processes	43506	regulation of JUN kinase activity		0.00053289	0.0090454	4/287 1.3%	14/9984 0.1%	EDN1 IL1B PTK2B TP73
LLA	Processes	48732	gland development		0.0005528	0.0093231	15/287 5.2%	197/9984 1.9%	FLG VWF CITED2 TGFB3 FEM1B ITGA2 SEMA3A TNC AHR ALDH1A3 CYP1A1 SOX9 IRF6 JARID2 TGM2
LLA	Processes	1932	regulation of protein phosphorylation		0.00059244	0.009928	20/287 6.9%	309/9984 3.0%	CARD10 EDN1 CDKN1B GADD45A TGFB3 SPHK1 SPRY4 TGFA EREG CTGF CDK7 SOCS1 IL1B CLCF1 PLCE1 PTK2B ITGA5 TRIB1 TP73 CDK5R1
LLA	Processes	35239	tube morphogenesis		0.00061583	0.010255	19/287 6.6%	287/9984 2.8%	FLG VASP VAV3 EDN1 CXCL8 CITED2 EREG AMOT CTGF ZFP36L1 KLF5 PC PLAU PTK2B ITGA5 APOB LGR4 TP73 TGM2
LLA	Processes	71900	regulation of protein serine/threonine kinase activity		0.00062933	0.010414	10/287 3.4%	101/9984 1.0%	EDN1 CDK7 CDKN1B GADD45A IL1B SPRY4 PTK2B TRIB1 TP73 CDK5R1
LLA	Processes	3006	developmental process involved in reproduction		0.00064091	0.010539	24/287 8.3%	406/9984 4.0%	VWF CITED2 FEM1B NOS3 FST TNC AHR PRDM1 INHBA OVOL1 EREG PIAS1 CYP27B1 RGS2 CYP26B1 BCL6 SLIT1 PTK2B ACSBG1 SOX9 APOB MAMLD1 LGR4 ZSCAN2
LLA	Processes	120036	plasma membrane bounded cell projection organization	x	0.00066092	0.0108	18/287 6.2%	266/9984 2.6%	FLG VASP VAV3 CLIC5 AMIGO1 ATL1 SEMA3A NGF ACTB EXT1 KLF5 SLIT1 PTK2B STX3 MNX1 VCL EPHB3 CDK5R1
LLA	Processes	6937	regulation of muscle contraction		0.00066544	0.010807	7/287 2.4%	52/9984 0.5%	EDN1 SPHK1 ITGA2 TNC PLCE1 PTGS1 CTGF
LLA	Processes	48660	regulation of smooth muscle cell proliferation		0.00068097	0.010992	6/287 2.0%	38/9984 0.3%	EDN1 NOS3 ITGA2 TRIB1 EREG TGM2
LLA	Processes	8284	positive regulation of cell population proliferation		0.00068571	0.011001	21/287 7.3%	336/9984 3.3%	FLG EDN1 EGR4 SPHK1 ITGA2 TGFA OSMR TICAM1 NGF F3 PTHLH EREG CTGF FOSL1 KLF5 BCL6 IL1B PELI1 PTK2B S1PR3 TGM2
LLA	Processes	40007	growth		0.00069975	0.011158	13/287 4.5%	160/9984 1.6%	FLG TGFB3 SERPINE1 PLAUR EMP1 ARID5B INHBA EREG CHST11 PLAU SLIT1 ERCC5 SOX9
LLA	Processes	50926	regulation of positive chemotaxis		0.00071034	0.011191	4/287 1.3%	15/9984 0.1%	CXCL8 ITGA2 CCR4 F3
LLA	Processes	50927	positive regulation of positive chemotaxis		0.00071034	0.011191	4/287 1.3%	15/9984 0.1%	CXCL8 ITGA2 CCR4 F3
LLA	Processes	7413	axonal fasciculation		0.00075506	0.011747	3/287 1.0%	7/9984 0.0%	AMIGO1 SEMA3A CDK5R1
LLA	Processes	106030	neuron projection fasciculation		0.00075506	0.011747	3/287 1.0%	7/9984 0.0%	AMIGO1 SEMA3A CDK5R1
LLA	Processes	19722	calcium-mediated signaling		0.00075899	0.011747	5/287 1.7%	26/9984 0.2%	RCAN1 EDN1 CXCL8 SPHK1 PLCE1
LLA	Processes	72359	circulatory system development		0.00076905	0.011833	21/287 7.3%	339/9984 3.3%	FLG VAV3 EDN1 CXCL8 CITED2 SPHK1 TNC EREG AMOT CTGF ZFP36L1 KLF5 LOX PLAU ZNF408 GJA5 PLCE1 PTK2B SOX9 ITGA5 APOB
LLA	Processes	1901700	response to oxygen-containing compound		0.00079971	0.012229	26/287 9.0%	462/9984 4.6%	SERPINE1 PTGS1 CTGF CYP27B1 SOCS1 FADS6 SLIT1 PTK2B APOB DUOX2 TGFB3 NOS3 SPHK1 ITGA2 MMP3 WNT9A TICAM1 NGF F3 EREG FOSL1 IL1B CYP1A1 PELI1 TRIB1 CDK5R1
LLA	Processes	9968	negative regulation of signal transduction		0.00080414	0.012229	17/287 5.9%	248/9984 2.4%	PTPN1 TGFB3 TGFB1I1 FST SPRY4 TNFAIP3 IL1RL1 RGS2 CYP26B1 SOCS1 CHST11 BCL6 IL1B SLIT1 RGS20 TRIB1 TP73
LLA	Processes	10628	positive regulation of gene expression		0.00084634	0.012787	14/287 4.8%	184/9984 1.8%	CITED2 ITGA2 SERPINE1 PRDM1 TICAM1 EREG CTGF TLR1 IL1B IRF1 REL PELI1 PTK2B SOX9
LLA	Processes	7204	positive regulation of cytosolic calcium ion concentration		0.0008505	0.012787	8/287 2.7%	70/9984 0.7%	EDN1 P2RX2 IL1B PLCE1 PTK2B S1PR3 CCR4 TGM2
LLA	Processes	50729	positive regulation of inflammatory response		0.00090985	0.013601	5/287 1.7%	27/9984 0.2%	IL1B ITGA2 SERPINE1 OSMR TGM2
LLA	Processes	1676	long-chain fatty acid metabolic process		0.00092584	0.013685	4/287 1.3%	16/9984 0.1%	FADS6 SPHK1 ACSBG1 PTGS1
LLA	Processes	6636	unsaturated fatty acid biosynthetic process		0.00092584	0.013685	4/287 1.3%	16/9984 0.1%	EDN1 FADS6 SPHK1 PTGS1
LLA	Processes	45937	positive regulation of phosphate metabolic process		0.00094074	0.013751	14/287 4.8%	186/9984 1.8%	VAV3 CARD10 EDN1 TGFB3 NOS3 SPHK1 ITGA2 TGFA EREG CTGF IL1B CLCF1 PTK2B ITGA5
LLA	Processes	10562	positive regulation of phosphorus metabolic process		0.00094074	0.013751	14/287 4.8%	186/9984 1.8%	VAV3 CARD10 EDN1 TGFB3 NOS3 SPHK1 ITGA2 TGFA EREG CTGF IL1B CLCF1 PTK2B ITGA5
LLA	Processes	6915	apoptotic process		0.00095355	0.013861	30/287 10.4%	570/9984 5.7%	CDKN1B SEMA3A IL24 JADE1 TNFAIP3 AHR ETS1 SH3RF1 PTK2B IER3 TGM2 VAV3 TNFSF14 GADD45A TGFB3 FEM1B INHBA TICAM1 NGF RHOB GULP1 NET1 RNF144B ERN2 IL1B JMY ARHGEF2 MET TNFRSF21 TP73
LLA	Processes	45787	positive regulation of cell cycle		0.0010263	0.014836	8/287 2.7%	72/9984 0.7%	FOSL1 EDN1 CITED2 SPHK1 IL1B TGFA EREG CTGF
LLA	Processes	30278	regulation of ossification		0.0011753	0.016726	6/287 2.0%	42/9984 0.4%	PTGER4 CYP27B1 RSAD2 TGFB3 PTK2B SOX9
LLA	Processes	32967	positive regulation of collagen biosynthetic process		0.0011825	0.016726	3/287 1.0%	8/9984 0.0%	TGFB3 ITGA2 CTGF
LLA	Processes	10714	positive regulation of collagen metabolic process		0.0011825	0.016726	3/287 1.0%	8/9984 0.0%	TGFB3 ITGA2 CTGF
LLA	Processes	14911	positive regulation of smooth muscle cell migration		0.0011825	0.016726	3/287 1.0%	8/9984 0.0%	P2RY6 ITGA2 F3
LLA	Processes	12501	programmed cell death		0.0011895	0.016735	30/287 10.4%	578/9984 5.7%	CDKN1B SEMA3A IL24 JADE1 TNFAIP3 AHR ETS1 SH3RF1 PTK2B IER3 TGM2 VAV3 TNFSF14 GADD45A TGFB3 FEM1B INHBA TICAM1 NGF RHOB GULP1 NET1 RNF144B ERN2 IL1B JMY ARHGEF2 MET TNFRSF21 TP73
LLA	Processes	7186	G protein-coupled receptor signaling pathway		0.0012163	0.017022	14/287 4.8%	191/9984 1.9%	PTGER4 GPSM2 EDN1 CXCL8 SPHK1 PTHLH EREG AKAP12 P2RY6 SCG5 PLCE1 S1PR3 CDK5R1 TGM2
LLA	Processes	1817	regulation of cytokine production		0.0012754	0.017732	12/287 4.1%	150/9984 1.5%	TLR1 BCL6 SPHK1 IL1B IRF1 SERPINE1 REL PELI1 S1PR3 INHBA TICAM1 EREG
LLA	Processes	36293	response to decreased oxygen levels		0.0012805	0.017732	11/287 3.8%	130/9984 1.3%	EDN1 CITED2 PLAU TGFB3 NOS3 ITGA2 CYP1A1 PTK2B ANGPTL4 SOD3 CTGF
LLA	Processes	31401	positive regulation of protein modification process		0.0012929	0.017809	15/287 5.2%	214/9984 2.1%	CARD10 EDN1 TGFB3 SPHK1 TGFA TICAM1 EREG CTGF PIAS1 IL1B CLCF1 PELI1 PTK2B ITGA5 JARID2
LLA	Processes	51480	regulation of cytosolic calcium ion concentration		0.0013432	0.018407	8/287 2.7%	75/9984 0.7%	EDN1 P2RX2 IL1B PLCE1 PTK2B S1PR3 CCR4 TGM2
LLA	Processes	65009	regulation of molecular function		0.0013742	0.018734	34/287 11.8%	690/9984 6.9%	CDKN1B SERPINE1 TNC TGFA CTGF SYDE2 CYP27B1 PLAU CALD1 PLCE1 PTK2B VAV3 CARD10 EDN1 GADD45A FEM1B NOS3 SPHK1 ITGA2 SPRY4 TICAM1 F3 EREG RCAN1 CDK7 BCL6 IL1B JMY ANGPTL4 ARHGEF2 HAP1 TRIB1 TP73 CDK5R1
LLA	Processes	48666	neuron development		0.001459	0.019761	16/287 5.5%	239/9984 2.3%	FLG VASP CLIC5 AMIGO1 ATL1 SEMA3A NGF ACTB EXT1 SLIT1 PTK2B STX3 MNX1 EPHB3 TP73 CDK5R1
LLA	Processes	31960	response to corticosteroid		0.0014646	0.019761	8/287 2.7%	76/9984 0.7%	FOSL1 IL1B SERPINE1 SLIT1 ACSBG1 NGF PTGS1 CTGF
LLA	Processes	120254	olefinic compound metabolic process		0.0014876	0.019969	4/287 1.3%	18/9984 0.1%	ALDH1A3 FADS6 SPHK1 PTGS1
LLA	Processes	10638	positive regulation of organelle organization		0.0015946	0.021247	8/287 2.7%	77/9984 0.7%	EDN1 IL1B JMY CDC42EP2 TGFA JARID2 EREG AMOT
LLA	Processes	10035	response to inorganic substance		0.001599	0.021247	13/287 4.5%	175/9984 1.7%	PRNP NOS3 SPHK1 TNC F3 NDRG1 SOD3 ACTB FOSL1 IL1B CYP1A1 PTK2B APOB
LLA	Processes	30030	cell projection organization		0.0017036	0.022524	18/287 6.2%	289/9984 2.8%	FLG VASP VAV3 CLIC5 AMIGO1 ATL1 SEMA3A NGF ACTB EXT1 KLF5 SLIT1 PTK2B STX3 MNX1 VCL EPHB3 CDK5R1
LLA	Processes	71396	cellular response to lipid		0.0017188	0.022611	9/287 3.1%	96/9984 0.9%	CDK7 NOS3 TGFB1I1 SERPINE1 KLF9 FHL2 WNT9A TICAM1 PIAS1
LLA	Processes	2009	morphogenesis of an epithelium	x	0.0017964	0.023514	14/287 4.8%	199/9984 1.9%	FLG VASP EDN1 FEM1B TGFB1I1 FST SEMA3A TNC ALDH1A3 PC SOX9 ITGA5 VCL TGM2
LLA	Processes	45840	positive regulation of mitotic nuclear division		0.0018421	0.023779	4/287 1.3%	19/9984 0.1%	EDN1 IL1B TGFA EREG
LLA	Processes	71219	cellular response to molecule of bacterial origin		0.0018421	0.023779	4/287 1.3%	19/9984 0.1%	TLR1 NOS3 SERPINE1 TICAM1
LLA	Processes	70482	response to oxygen levels		0.0018438	0.023779	11/287 3.8%	136/9984 1.3%	EDN1 CITED2 PLAU TGFB3 NOS3 ITGA2 CYP1A1 PTK2B ANGPTL4 SOD3 CTGF
LLA	Processes	43549	regulation of kinase activity		0.0018604	0.023877	15/287 5.2%	222/9984 2.2%	VAV3 CARD10 EDN1 CDKN1B GADD45A SPRY4 TGFA EREG CDK7 IL1B PLCE1 PTK2B TRIB1 TP73 CDK5R1
LLA	Processes	43405	regulation of MAP kinase activity		0.0019066	0.024239	6/287 2.0%	46/9984 0.4%	EDN1 IL1B SPRY4 PTK2B TRIB1 TP73
LLA	Processes	97485	neuron projection guidance		0.0019163	0.024239	7/287 2.4%	62/9984 0.6%	VASP EXT1 SEMA3A SLIT1 MNX1 EPHB3 CDK5R1
LLA	Processes	7411	axon guidance		0.0019163	0.024239	7/287 2.4%	62/9984 0.6%	VASP EXT1 SEMA3A SLIT1 MNX1 EPHB3 CDK5R1
LLA	Processes	50921	positive regulation of chemotaxis		0.0020184	0.025264	5/287 1.7%	32/9984 0.3%	CXCL8 ITGA2 SERPINE1 CCR4 F3
LLA	Processes	1903531	negative regulation of secretion by cell		0.0020184	0.025264	5/287 1.7%	32/9984 0.3%	EDN1 IL1B FST INHBA PTGS1
LLA	Processes	32268	regulation of cellular protein metabolic process		0.0020261	0.025264	31/287 10.8%	625/9984 6.2%	CDKN1B SERPINE2 SERPINE1 TGFA CTGF ZFP36L1 SOCS1 PLCE1 PTK2B JARID2 CARD10 EDN1 GADD45A TGFB3 NOS3 SPHK1 ITGA2 SPRY4 TICAM1 F3 EREG PIAS1 RCAN1 CDK7 IL1B CLCF1 PELI1 ITGA5 TRIB1 TP73 CDK5R1
LLA	Processes	51338	regulation of transferase activity		0.0022205	0.027558	16/287 5.5%	249/9984 2.4%	VAV3 CARD10 EDN1 CDKN1B GADD45A FEM1B SPRY4 TGFA EREG CDK7 IL1B PLCE1 PTK2B TRIB1 TP73 CDK5R1
LLA	Processes	32570	response to progesterone		0.0022511	0.027806	4/287 1.3%	20/9984 0.2%	FOSL1 SOCS1 TGFB3 SPHK1
LLA	Processes	31347	regulation of defense response		0.0022828	0.027979	9/287 3.1%	100/9984 1.0%	BCL6 IL1B ITGA2 SERPINE1 IFNK IFNLR1 OSMR EREG TGM2
LLA	Processes	48699	generation of neurons		0.0022864	0.027979	22/287 7.6%	395/9984 3.9%	FLG VASP CLIC5 PTPRR SERPINE2 AMIGO1 ATL1 SEMA3A WNT9A NGF ACTB EXT1 ARTN SLIT1 PTK2B STX3 CCR4 ZNF488 MNX1 EPHB3 TP73 CDK5R1
LLA	Processes	45859	regulation of protein kinase activity		0.0023689	0.028137	14/287 4.8%	205/9984 2.0%	CARD10 EDN1 CDKN1B GADD45A SPRY4 TGFA EREG CDK7 IL1B PLCE1 PTK2B TRIB1 TP73 CDK5R1
LLA	Processes	70365	hepatocyte differentiation		0.0024236	0.028137	2/287 0.6%	3/9984 0.0%	ITGA2 CYP1A1
LLA	Processes	34374	low-density lipoprotein particle remodeling		0.0024236	0.028137	2/287 0.6%	3/9984 0.0%	LIPH APOB
LLA	Processes	10757	negative regulation of plasminogen activation		0.0024236	0.028137	2/287 0.6%	3/9984 0.0%	SERPINE2 SERPINE1
LLA	Processes	1903318	negative regulation of protein maturation		0.0024236	0.028137	2/287 0.6%	3/9984 0.0%	SERPINE2 SERPINE1
LLA	Processes	10955	negative regulation of protein processing		0.0024236	0.028137	2/287 0.6%	3/9984 0.0%	SERPINE2 SERPINE1
LLA	Processes	48016	inositol phosphate-mediated signaling		0.0024236	0.028137	2/287 0.6%	3/9984 0.0%	EDN1 PLCE1
LLA	Processes	19371	cyclooxygenase pathway		0.0024236	0.028137	2/287 0.6%	3/9984 0.0%	SPHK1 PTGS1
LLA	Processes	33628	regulation of cell adhesion mediated by integrin	x	0.0024277	0.028137	3/287 1.0%	10/9984 0.1%	PC PLAU SERPINE1
LLA	Processes	43507	positive regulation of JUN kinase activity		0.0024277	0.028137	3/287 1.0%	10/9984 0.1%	EDN1 IL1B PTK2B
LLA	Processes	19369	arachidonic acid metabolic process		0.0024277	0.028137	3/287 1.0%	10/9984 0.1%	FADS6 SPHK1 PTGS1
LLA	Processes	32330	regulation of chondrocyte differentiation		0.0024277	0.028137	3/287 1.0%	10/9984 0.1%	SOX9 WNT9A PTHLH
LLA	Processes	34330	cell junction organization	x	0.0024446	0.028209	9/287 3.1%	101/9984 1.0%	LAMB3 TGFB3 GJA5 TNC PTK2B LAMC2 ITGA5 VCL AMOT
LLA	Processes	1902533	positive regulation of intracellular signal transduction		0.002515	0.028895	15/287 5.2%	229/9984 2.2%	FLG EDN1 TNFSF14 PLK2 SPHK1 TICAM1 F3 AKAP12 P2RX2 IL1B REL PELI1 PTK2B HBEGF TGM2
LLA	Processes	48609	multicellular organismal reproductive process		0.0025448	0.02911	19/287 6.6%	324/9984 3.2%	CITED2 NOS3 FST PRDM1 INHBA OVOL1 EREG PIAS1 CYP27B1 RGS2 CYP26B1 BCL6 IL1B CYP1A1 SLIT1 PTK2B SOX9 APOB ZSCAN2
LLA	Processes	71310	cellular response to organic substance		0.0025886	0.029483	22/287 7.6%	399/9984 3.9%	FLG ZFYVE9 TGFB3 NOS3 TGFB1I1 FST ITGA2 SERPINE1 FHL2 WNT9A TICAM1 EREG CTGF PIAS1 CDK7 SOCS1 IL1B CLCF1 KLF9 IFNK SLIT1 DUOX2
LLA	Processes	48667	cell morphogenesis involved in neuron differentiation		0.0026643	0.030166	10/287 3.4%	122/9984 1.2%	VASP EXT1 CLIC5 ATL1 SEMA3A SLIT1 ACTB MNX1 EPHB3 CDK5R1
LLA	Processes	6952	defense response		0.0026715	0.030166	20/287 6.9%	350/9984 3.5%	CXCL8 RSAD2 SPHK1 SERPINE1 INHBA TICAM1 NGF F3 FOSL1 IFIH1 TLR1 CYP27B1 IL1RL1 IL1B LCN2 IFNK S1PR3 ITGB6 CCR4 TP73
LLA	Processes	46888	negative regulation of hormone secretion		0.0027186	0.030437	4/287 1.3%	21/9984 0.2%	EDN1 IL1B FST INHBA
LLA	Processes	51785	positive regulation of nuclear division		0.0027186	0.030437	4/287 1.3%	21/9984 0.2%	EDN1 IL1B TGFA EREG
LLA	Processes	22008	neurogenesis		0.0027977	0.031142	23/287 8.0%	427/9984 4.2%	FLG VASP CLIC5 PTPRR SERPINE2 AMIGO1 ATL1 SEMA3A WNT9A NGF ACTB EXT1 ARTN SLIT1 PTK2B SOX9 STX3 CCR4 ZNF488 MNX1 EPHB3 TP73 CDK5R1
LLA	Processes	51173	positive regulation of nitrogen compound metabolic process		0.0028053	0.031142	36/287 12.5%	776/9984 7.7%	EHF CITED2 TGFB1I1 FHL2 TGFA AHR ETS1 CTGF ZFP36L1 PTK2B SOX9 JARID2 CARD10 EDN1 TGFB3 NOS3 SPHK1 ITGA2 GRHL3 INHBA TICAM1 F3 EREG PIAS1 CDK7 KLF5 ELF4 IL1B CLCF1 IRF1 REL PELI1 IRF6 ITGA5 TRIB1 TP73
LLA	Processes	32504	multicellular organism reproduction		0.0028201	0.031175	19/287 6.6%	327/9984 3.2%	CITED2 NOS3 FST PRDM1 INHBA OVOL1 EREG PIAS1 CYP27B1 RGS2 CYP26B1 BCL6 IL1B CYP1A1 SLIT1 PTK2B SOX9 APOB ZSCAN2
LLA	Processes	30155	regulation of cell adhesion	x	0.0028752	0.031651	13/287 4.5%	187/9984 1.8%	VAV3 COL26A1 CXCL8 SERPINE2 TNFSF14 CITED2 ITGA2 SERPINE1 PC BCL6 PLAU IL1B TGM2
LLA	Processes	31325	positive regulation of cellular metabolic process		0.0029296	0.032116	37/287 12.8%	806/9984 8.0%	EHF CITED2 TGFB1I1 FHL2 TGFA AHR ETS1 CTGF ZFP36L1 PTK2B SOX9 JARID2 VAV3 CARD10 EDN1 TGFB3 NOS3 SPHK1 ITGA2 GRHL3 INHBA TICAM1 F3 EREG PIAS1 CDK7 KLF5 ELF4 IL1B CLCF1 IRF1 REL PELI1 IRF6 ITGA5 TRIB1 TP73
LLA	Processes	61564	axon development		0.0030003	0.032572	10/287 3.4%	124/9984 1.2%	VASP EXT1 AMIGO1 ATL1 SEMA3A SLIT1 ACTB MNX1 EPHB3 CDK5R1
LLA	Processes	34329	cell junction assembly	x	0.0030004	0.032572	7/287 2.4%	67/9984 0.6%	LAMB3 GJA5 PTK2B LAMC2 ITGA5 VCL AMOT
LLA	Processes	9893	positive regulation of metabolic process		0.0030083	0.032572	40/287 13.9%	892/9984 8.9%	EHF CITED2 TGFB1I1 SERPINE1 FHL2 TGFA AHR PRDM1 ETS1 CTGF ZFP36L1 PTK2B SOX9 JARID2 VAV3 CARD10 EDN1 TGFB3 NOS3 SPHK1 ITGA2 GRHL3 INHBA TICAM1 F3 EREG PIAS1 TLR1 CDK7 KLF5 ELF4 IL1B CLCF1 IRF1 REL PELI1 IRF6 ITGA5 TRIB1 TP73
LLA	Processes	50790	regulation of catalytic activity		0.0031768	0.034114	27/287 9.4%	536/9984 5.3%	CDKN1B SERPINE1 TNC TGFA CTGF SYDE2 CYP27B1 PLCE1 PTK2B VAV3 CARD10 EDN1 GADD45A FEM1B NOS3 ITGA2 SPRY4 F3 EREG RCAN1 CDK7 BCL6 IL1B ANGPTL4 TRIB1 TP73 CDK5R1
LLA	Processes	10469	regulation of signaling receptor activity		0.0032486	0.034114	4/287 1.3%	22/9984 0.2%	PLAU SERPINE1 TGFA EREG
LLA	Processes	7200	phospholipase C-activating G protein-coupled receptor signaling pathway		0.0032486	0.034114	4/287 1.3%	22/9984 0.2%	EDN1 P2RY6 PLCE1 TGM2
LLA	Processes	32755	positive regulation of interleukin-6 production		0.0032486	0.034114	4/287 1.3%	22/9984 0.2%	TLR1 IL1B TICAM1 EREG
LLA	Processes	42445	hormone metabolic process		0.0032644	0.034114	7/287 2.4%	68/9984 0.6%	ALDH1A3 CYP26B1 CYP1A1 SCG5 NGF DHRS2 DUOX2
LLA	Processes	22612	gland morphogenesis		0.0032644	0.034114	7/287 2.4%	68/9984 0.6%	FLG TGFB3 FEM1B SEMA3A TNC SOX9 TGM2
LLA	Processes	90303	positive regulation of wound healing	x	0.0032675	0.034114	3/287 1.0%	11/9984 0.1%	SERPINE1 F3 HBEGF
LLA	Processes	46457	prostanoid biosynthetic process		0.0032675	0.034114	3/287 1.0%	11/9984 0.1%	EDN1 SPHK1 PTGS1
LLA	Processes	1516	prostaglandin biosynthetic process		0.0032675	0.034114	3/287 1.0%	11/9984 0.1%	EDN1 SPHK1 PTGS1
LLA	Processes	45321	leukocyte activation		0.0034723	0.03611	12/287 4.1%	169/9984 1.6%	TLR1 EDN1 CXCL8 TNFSF14 BCL6 ELF4 CLCF1 IRF1 IFNK TICAM1 DHRS2 NDRG1
LLA	Processes	72330	monocarboxylic acid biosynthetic process		0.0035458	0.036728	7/287 2.4%	69/9984 0.6%	ALDH1A3 EDN1 FADS6 LIPH SPHK1 CYP1A1 PTGS1
LLA	Processes	32270	positive regulation of cellular protein metabolic process		0.0036384	0.037539	18/287 6.2%	310/9984 3.1%	CARD10 EDN1 TGFB3 SPHK1 ITGA2 TGFA TICAM1 F3 EREG CTGF PIAS1 IL1B CLCF1 PELI1 PTK2B ITGA5 TRIB1 JARID2
LLA	Processes	1666	response to hypoxia		0.0037737	0.038784	10/287 3.4%	128/9984 1.2%	EDN1 CITED2 PLAU TGFB3 NOS3 ITGA2 CYP1A1 PTK2B ANGPTL4 SOD3
LLA	Processes	51384	response to glucocorticoid		0.0038453	0.039239	7/287 2.4%	70/9984 0.7%	FOSL1 IL1B SERPINE1 SLIT1 ACSBG1 NGF PTGS1
LLA	Processes	31344	regulation of cell projection organization		0.0038478	0.039239	9/287 3.1%	108/9984 1.0%	PC TGFB3 SPHK1 AMIGO1 ITGA2 SEMA3A CDC42EP2 SLIT1 NGF
LLA	Processes	50673	epithelial cell proliferation	x	0.0038871	0.039335	5/287 1.7%	37/9984 0.3%	FST SOX9 IRF6 LGR4 EREG
LLA	Processes	51048	negative regulation of secretion		0.0038871	0.039335	5/287 1.7%	37/9984 0.3%	EDN1 IL1B FST INHBA PTGS1
LLA	Processes	1901654	response to ketone		0.0039525	0.039843	6/287 2.0%	53/9984 0.5%	FOSL1 SOCS1 TGFB3 SPHK1 SLIT1 PTGS1
LLA	Processes	8406	gonad development		0.0039827	0.039995	8/287 2.7%	89/9984 0.8%	NOS3 FST SLIT1 ACSBG1 SOX9 INHBA MAMLD1 EREG
LLA	Processes	30182	neuron differentiation		0.0041614	0.041257	18/287 6.2%	314/9984 3.1%	FLG VASP CLIC5 PTPRR AMIGO1 ATL1 SEMA3A WNT9A NGF ACTB EXT1 SLIT1 PTK2B STX3 MNX1 EPHB3 TP73 CDK5R1
LLA	Processes	51246	regulation of protein metabolic process		0.0041755	0.041257	33/287 11.4%	711/9984 7.1%	CDKN1B SERPINE2 SERPINE1 TGFA CTGF ZFP36L1 SOCS1 PLCE1 PTK2B JARID2 CARD10 EDN1 GADD45A TGFB3 NOS3 SPHK1 ITGA2 SPRY4 PLAUR TICAM1 F3 EREG PIAS1 RCAN1 CDK7 IL1B CLCF1 PELI1 ITGA5 TRIB1 TP73 HBEGF CDK5R1
LLA	Processes	1525	angiogenesis		0.0042156	0.041257	10/287 3.4%	130/9984 1.3%	FLG VAV3 EDN1 CXCL8 KLF5 PLAU PTK2B ITGA5 EREG CTGF
LLA	Processes	2376	immune system process		0.0042509	0.041257	30/287 10.4%	629/9984 6.3%	PTGER4 SEMA7A CXCL8 SERPINE1 ETS1 NDRG1 IFIH1 CYP27B1 IL1RL1 NFIL3 JARID2 CCR4 MNX1 EDN1 RSAD2 TNFSF14 FST MSN INHBA TICAM1 DHRS2 TLR1 PC BCL6 ELF4 IL1B CLCF1 IRF1 LCN2 IFNK
LLA	Processes	32965	regulation of collagen biosynthetic process		0.0042647	0.041257	3/287 1.0%	12/9984 0.1%	TGFB3 ITGA2 CTGF
LLA	Processes	42573	retinoic acid metabolic process		0.0042647	0.041257	3/287 1.0%	12/9984 0.1%	ALDH1A3 CYP26B1 CYP1A1
LLA	Processes	43616	keratinocyte proliferation		0.0042647	0.041257	3/287 1.0%	12/9984 0.1%	FST IRF6 EREG
LLA	Processes	6775	fat-soluble vitamin metabolic process		0.0042647	0.041257	3/287 1.0%	12/9984 0.1%	CYP27B1 CYP26B1 CYP1A1
LLA	Processes	61035	regulation of cartilage development		0.0042647	0.041257	3/287 1.0%	12/9984 0.1%	SOX9 WNT9A PTHLH
LLA	Processes	45137	development of primary sexual characteristics		0.0042652	0.041257	8/287 2.7%	90/9984 0.9%	NOS3 FST SLIT1 ACSBG1 SOX9 INHBA MAMLD1 EREG
LLA	Processes	1775	cell activation		0.0042997	0.041304	13/287 4.5%	196/9984 1.9%	EDN1 CXCL8 TNFSF14 VWF TICAM1 DHRS2 NDRG1 TLR1 BCL6 ELF4 CLCF1 IRF1 IFNK
LLA	Processes	1901698	response to nitrogen compound		0.0043015	0.041304	18/287 6.2%	315/9984 3.1%	NOS3 SPHK1 ITGA2 MMP3 TICAM1 NGF F3 EREG PTGS1 CTGF FOSL1 SOCS1 FADS6 IL1B PELI1 PTK2B DUOX2 CDK5R1
LLA	Processes	90068	positive regulation of cell cycle process		0.0043729	0.041837	5/287 1.7%	38/9984 0.3%	EDN1 IL1B TGFA EREG CTGF
LLA	Processes	7435	salivary gland morphogenesis		0.0045109	0.04244	4/287 1.3%	24/9984 0.2%	FLG TGFB3 SEMA3A TGM2
LLA	Processes	48661	positive regulation of smooth muscle cell proliferation		0.0045109	0.04244	4/287 1.3%	24/9984 0.2%	EDN1 ITGA2 EREG TGM2
LLA	Processes	7399	nervous system development		0.0045208	0.04244	36/287 12.5%	799/9984 8.0%	FLG CLIC5 PTPRR SEMA7A SERPINE2 CITED2 AMIGO1 ATL1 SEMA3A CLDN1 ACTB SLIT1 PTK2B SOX9 STX3 APOB JARID2 CCR4 ZNF488 MNX1 EPHB3 VASP SPHK1 SEMA4B WNT9A INHBA NAV2 NGF EXT1 RCAN1 ALDH1A3 ARTN ACSBG1 HAP1 TP73 CDK5R1
LLA	Processes	33591	response to L-ascorbic acid		0.0047551	0.04244	2/287 0.6%	4/9984 0.0%	IL1B ITGA2
LLA	Processes	9111	vitamin catabolic process		0.0047551	0.04244	2/287 0.6%	4/9984 0.0%	CYP27B1 CYP26B1
LLA	Processes	70613	regulation of protein processing		0.0047551	0.04244	2/287 0.6%	4/9984 0.0%	SERPINE2 SERPINE1
LLA	Processes	42363	fat-soluble vitamin catabolic process		0.0047551	0.04244	2/287 0.6%	4/9984 0.0%	CYP27B1 CYP26B1
LLA	Processes	46880	regulation of follicle-stimulating hormone secretion		0.0047551	0.04244	2/287 0.6%	4/9984 0.0%	FST INHBA
LLA	Processes	46882	negative regulation of follicle-stimulating hormone secretion		0.0047551	0.04244	2/287 0.6%	4/9984 0.0%	FST INHBA
LLA	Processes	55094	response to lipoprotein particle		0.0047551	0.04244	2/287 0.6%	4/9984 0.0%	NOS3 F3
LLA	Processes	14805	smooth muscle adaptation		0.0047551	0.04244	2/287 0.6%	4/9984 0.0%	NOS3 IL1B
LLA	Processes	10755	regulation of plasminogen activation		0.0047551	0.04244	2/287 0.6%	4/9984 0.0%	SERPINE2 SERPINE1
LLA	Processes	1903317	regulation of protein maturation		0.0047551	0.04244	2/287 0.6%	4/9984 0.0%	SERPINE2 SERPINE1
LLA	Processes	3100	regulation of systemic arterial blood pressure by endothelin		0.0047551	0.04244	2/287 0.6%	4/9984 0.0%	EDN1 NOS3
LLA	Processes	85029	extracellular matrix assembly		0.0047551	0.04244	2/287 0.6%	4/9984 0.0%	TNXB LOX
LLA	Processes	48251	elastic fiber assembly		0.0047551	0.04244	2/287 0.6%	4/9984 0.0%	TNXB LOX
LLA	Processes	32276	regulation of gonadotropin secretion		0.0047551	0.04244	2/287 0.6%	4/9984 0.0%	FST INHBA
LLA	Processes	32277	negative regulation of gonadotropin secretion		0.0047551	0.04244	2/287 0.6%	4/9984 0.0%	FST INHBA
LLA	Processes	90084	negative regulation of inclusion body assembly		0.0047551	0.04244	2/287 0.6%	4/9984 0.0%	HSPA1B HSPA1A
LLA	Processes	8361	regulation of cell size		0.0047585	0.04244	6/287 2.0%	55/9984 0.5%	EDN1 SEMA3A SLIT1 NGF TP73 AMOT
LLA	Processes	7409	axonogenesis		0.0048948	0.043121	9/287 3.1%	112/9984 1.1%	VASP EXT1 ATL1 SEMA3A SLIT1 ACTB MNX1 EPHB3 CDK5R1
LLA	Processes	48589	developmental growth		0.0048948	0.043121	9/287 3.1%	112/9984 1.1%	CHST11 PLAU SERPINE1 PLAUR SLIT1 ARID5B ERCC5 SOX9 EREG
LLA	Processes	10604	positive regulation of macromolecule metabolic process		0.0048999	0.043121	38/287 13.2%	860/9984 8.6%	EHF CITED2 TGFB1I1 SERPINE1 FHL2 TGFA AHR PRDM1 ETS1 CTGF ZFP36L1 PTK2B SOX9 JARID2 CARD10 EDN1 TGFB3 SPHK1 ITGA2 GRHL3 INHBA TICAM1 F3 EREG PIAS1 TLR1 CDK7 KLF5 ELF4 IL1B CLCF1 IRF1 REL PELI1 IRF6 ITGA5 TRIB1 TP73
LLA	Processes	2274	myeloid leukocyte activation		0.0049005	0.043121	5/287 1.7%	39/9984 0.3%	TLR1 CXCL8 TICAM1 DHRS2 NDRG1
LLA	Processes	42327	positive regulation of phosphorylation		0.0050332	0.044141	12/287 4.1%	177/9984 1.7%	VAV3 CARD10 EDN1 TGFB3 SPHK1 IL1B CLCF1 TGFA PTK2B ITGA5 EREG CTGF
LLA	Processes	16042	lipid catabolic process		0.0052215	0.045592	10/287 3.4%	134/9984 1.3%	SMPD3 CYP27B1 CYP26B1 LIPH SPHK1 PNPLA3 PLCE1 APOB SLC27A2 PNPLA1
LLA	Processes	46456	icosanoid biosynthetic process		0.0052506	0.045592	4/287 1.3%	25/9984 0.2%	EDN1 FADS6 SPHK1 PTGS1
LLA	Processes	22602	ovulation cycle process		0.0052506	0.045592	4/287 1.3%	25/9984 0.2%	NOS3 SLIT1 INHBA EREG
LLA	Processes	50886	endocrine process		0.0054273	0.046664	3/287 1.0%	13/9984 0.1%	EDN1 NOS3 INHBA
LLA	Processes	1903036	positive regulation of response to wounding	x	0.0054273	0.046664	3/287 1.0%	13/9984 0.1%	SERPINE1 F3 HBEGF
LLA	Processes	10712	regulation of collagen metabolic process		0.0054273	0.046664	3/287 1.0%	13/9984 0.1%	TGFB3 ITGA2 CTGF
LLA	Processes	9891	positive regulation of biosynthetic process		0.0054641	0.04675	26/287 9.0%	531/9984 5.3%	EHF CITED2 TGFB1I1 FHL2 AHR ETS1 CTGF PTK2B SOX9 EDN1 TGFB3 NOS3 ITGA2 GRHL3 INHBA TICAM1 EREG PIAS1 CDK7 KLF5 ELF4 IL1B IRF1 REL IRF6 TP73
LLA	Processes	8219	cell death		0.0054728	0.04675	31/287 10.8%	668/9984 6.6%	CDKN1B ATL1 SEMA3A IL24 JADE1 TNFAIP3 AHR ETS1 SH3RF1 PTK2B IER3 TGM2 VAV3 TNFSF14 GADD45A TGFB3 FEM1B INHBA TICAM1 NGF RHOB GULP1 NET1 RNF144B ERN2 IL1B JMY ARHGEF2 MET TNFRSF21 TP73
LLA	Processes	50727	regulation of inflammatory response		0.0056794	0.048357	6/287 2.0%	57/9984 0.5%	BCL6 IL1B ITGA2 SERPINE1 OSMR TGM2
LLA	Processes	902	cell morphogenesis		0.0057458	0.048765	12/287 4.1%	180/9984 1.8%	VASP EXT1 CLIC5 BCL6 ATL1 SEMA3A SLIT1 ARHGEF2 ACTB MNX1 EPHB3 CDK5R1
DLA	Components	5576	extracellular region		5.1189e-11	1.9093e-08	83/453 18.3%	946/10752 8.7%	SFTA2 ECM1 IL20 CXCL8 SERPINE1 IL24 TNC PRSS27 PLAT METRNL IFI30 CLU WFDC5 CTGF GLIPR1 ADAMTS1 LIPH TIMP1 MUC15 RPTN IL11 EDN1 VWF FST SPINK5 PLAUR NGF F3 PGF EREG ACE2 PSG8 COL2A1 CDCP1 PSG5 LOX CRISPLD2 MFNG IFNK MMP19 ANGPTL4 S100A9 SMPDL3A VCL HBEGF S100A7 FLG FBLN7 TNXB SEMA3A LAMA4 SEMA3B KLK5 PSORS1C2 IL1RL1 LCN10 SLIT1 PLAC1 APOB TNFSF18 WNT10B IL33 C17ORF67 COL26A1 PSAPL1 LAMB3 TGFB3 IL3…
DLA	Components	71944	cell periphery		2.2609e-10	4.2166e-08	147/453 32.4%	2169/10752 20.1%	STEAP4 UPK2 NCF2 SERPINE1 TNC BEST2 CLDN1 CTGF AMOT RAB43 GJA5 PLCE1 RPTN TGM2 PPP1R16B SLC15A1 SPINK5 MTUS1 KCTD1 PRKCA ANK3 ATP1B2 LOR EREG ACE2 GPR162 CLDN4 ARC CRISPLD2 CLDN7 S100A9 VCL ABCG2 FLG SHC4 FBLN7 SEMA7A DLX2 FBLIM1 RRAD NPR1 SLC41A2 TACSTD2 LYPD2 CSF2RB VTCN1 APCDD1 ST3GAL5 S100A12 SLAMF7 KCNN4 APOB WNT10B MGAM KLRC2 TGFB3 TFPI2 IFNLR1 FOSL1 STAG1 OCLN CILP PTPRA ALPP BAMBI OR2A7 U…
DLA	Components	5615	extracellular space		4.9764e-08	6.1873e-06	41/453 9.0%	389/10752 3.6%	IL20 TNXB CXCL8 SERPINE1 IL24 TNC KLK5 PLAT CLU CTGF IL1RL1 LIPH SLIT1 APOB TNFSF18 WNT10B IL11 IL33 EDN1 TGFB3 IL34 A2ML1 NGF F3 SOD3 PGF SULF2 EREG ACE2 COL2A1 TCN2 FAP LOX CILP CLCF1 MFNG IFNK ANGPTL4 ULBP2 SMPDL3A HBEGF
DLA	Components	5886	plasma membrane	x	1.0265e-06	9.5724e-05	123/453 27.1%	1957/10752 18.2%	STEAP4 UPK2 NCF2 SERPINE1 BEST2 CLDN1 CTGF AMOT RAB43 GJA5 PLCE1 RPTN TGM2 PPP1R16B SLC15A1 MTUS1 KCTD1 PRKCA ANK3 ATP1B2 LOR EREG ACE2 GPR162 CLDN4 ARC CLDN7 S100A9 VCL ABCG2 FLG SHC4 SEMA7A DLX2 RRAD NPR1 SLC41A2 TACSTD2 LYPD2 CSF2RB VTCN1 APCDD1 ST3GAL5 S100A12 SLAMF7 KCNN4 APOB MGAM KLRC2 TGFB3 IFNLR1 FOSL1 STAG1 OCLN PTPRA ALPP BAMBI OR2A7 ULBP2 SPRR1A ULBP1 MUC20 PTPRR LRRC4 SIRPB2 LSP1 RND…
DLA	Components	30312	external encapsulating structure		2.3457e-05	0.0017499	23/453 5.0%	209/10752 1.9%	FBLN7 WNT10B COL26A1 ECM1 TNXB VWF LAMB3 TGFB3 ITGA2 LAMA4 SERPINE1 TFPI2 TNC F3 CTGF COL2A1 CILP ADAMTS1 CRISPLD2 MMP19 TIMP1 ANGPTL4 RPTN
DLA	Components	31012	extracellular matrix		5.5729e-05	0.0034645	22/453 4.8%	206/10752 1.9%	FBLN7 WNT10B COL26A1 ECM1 TNXB VWF LAMB3 TGFB3 LAMA4 SERPINE1 TFPI2 TNC F3 CTGF COL2A1 CILP ADAMTS1 CRISPLD2 MMP19 TIMP1 ANGPTL4 RPTN
DLA	Components	45095	keratin filament		0.00012323	0.0065663	7/453 1.5%	28/10752 0.2%	KRT4 KRTAP4-6 KRT79 KRT78 KRTAP1-5 KRTAP2-3 KRT75
DLA	Components	5882	intermediate filament		0.00017093	0.0079694	11/453 2.4%	71/10752 0.6%	FLG PC KRT4 KRTAP4-6 KRT79 KRT23 KRT34 KRT78 KRTAP1-5 KRTAP2-3 KRT75
DLA	Components	45111	intermediate filament cytoskeleton		0.00049754	0.02062	11/453 2.4%	80/10752 0.7%	FLG PC KRT4 KRTAP4-6 KRT79 KRT23 KRT34 KRT78 KRTAP1-5 KRTAP2-3 KRT75
DLA	Components	99512	supramolecular fiber		0.00061102	0.022791	32/453 7.0%	412/10752 3.8%	FLG DNAH3 TNC FHL2 KRT23 TUBD1 AMOT MAP2 CSPP1 MYH14 KRTAP1-5 KRTAP2-3 KRT4 KRTAP4-6 MTUS1 KRT79 CKAP2 KRT34 KIF24 KRT78 KRT75 EML2 TPPP3 COL2A1 PC TNNT3 ARHGEF2 FKBP4 KIF20B MYL9 VCL CDK5R1
DLA	Components	99081	supramolecular polymer		0.00078115	0.026488	32/453 7.0%	418/10752 3.8%	FLG DNAH3 TNC FHL2 KRT23 TUBD1 AMOT MAP2 CSPP1 MYH14 KRTAP1-5 KRTAP2-3 KRT4 KRTAP4-6 MTUS1 KRT79 CKAP2 KRT34 KIF24 KRT78 KRT75 EML2 TPPP3 COL2A1 PC TNNT3 ARHGEF2 FKBP4 KIF20B MYL9 VCL CDK5R1
DLA	Components	1533	cornified envelope		0.0015085	0.04388	5/453 1.1%	21/10752 0.1%	FLG SCEL SPRR1A RPTN LOR
DLA	Components	5856	cytoskeleton		0.0015293	0.04388	61/453 13.4%	991/10752 9.2%	CLIC5 TNC FHL2 LMOD1 KRT23 TNFAIP3 LSP1 ACTG2 AMOT RND1 AKAP12 EPB41L4A MPRIP CSPP1 KRTAP1-5 CCIN KRT4 MTUS1 KRT79 CKAP2 KRT34 KIF24 KRT78 ANK3 RHOF KRT75 EML2 CDC25B ARC SYNPO2L TNNT3 HAP1 ARHGEF2 FKBP4 KIF20B MYL9 S100A9 VCL FLG DNAH3 FBLIM1 TUBD1 TTK KALRN MAP2 STK38L MYH14 KRTAP2-3 CENPV NOS3 KRTAP4-6 CEP152 FANCB SORBS1 CDK7 MARCKS TPPP3 PC JMY SASS6 FERMT2
DLA	Components	32002	interleukin-28 receptor complex		0.0017713	0.047193	2/453 0.4%	2/10752 0.0%	IL10RB IFNLR1
DLA	Functions	38023	signaling receptor activity		5.1934e-07	0.00018692	48/412 11.6%	573/10447 5.4%	FLG PTGER4 SEMA7A PTPRR HPGD NPR1 SEMA3A SEMA3B TACSTD2 CSF2RB AHR AMOT IL1RL1 P2RY6 GRM5 P2RY2 SLAMF7 S1PR3 FCGR1A S1PR5 LBR CCR4 GUCY1A1 KLRC2 IL10RB IL10RA ITGA2 RIPK4 PLAUR NR1D2 IFNLR1 GPR3 MERTK SORCS2 TLR1 GPR162 NR4A1 CLDN4 NR4A3 PTPRA P2RX2 F2RL1 OR2A7 ITGA5 ULBP2 ULBP1 HBEGF MEGF9
DLA	Functions	60089	molecular transducer activity		5.7513e-07	0.00018692	48/412 11.6%	575/10447 5.5%	FLG PTGER4 SEMA7A PTPRR HPGD NPR1 SEMA3A SEMA3B TACSTD2 CSF2RB AHR AMOT IL1RL1 P2RY6 GRM5 P2RY2 SLAMF7 S1PR3 FCGR1A S1PR5 LBR CCR4 GUCY1A1 KLRC2 IL10RB IL10RA ITGA2 RIPK4 PLAUR NR1D2 IFNLR1 GPR3 MERTK SORCS2 TLR1 GPR162 NR4A1 CLDN4 NR4A3 PTPRA P2RX2 F2RL1 OR2A7 ITGA5 ULBP2 ULBP1 HBEGF MEGF9
DLA	Functions	8201	heparin binding		1.1835e-05	0.0025643	12/412 2.9%	68/10447 0.6%	FLG FBLN7 TNXB FAP ADAMTS1 CRISPLD2 LIPH APOB SOD3 PGF HBEGF CTGF
DLA	Functions	1901681	sulfur compound binding		7.1808e-05	0.011669	15/412 3.6%	120/10447 1.1%	FLG FBLN7 TNXB FST SOD3 PGF CTGF PC FAP ADAMTS1 CRISPLD2 LIPH SLIT1 APOB HBEGF
DLA	Functions	5539	glycosaminoglycan binding		0.00016372	0.018326	12/412 2.9%	88/10447 0.8%	FLG FBLN7 TNXB FAP ADAMTS1 CRISPLD2 LIPH APOB SOD3 PGF HBEGF CTGF
DLA	Functions	5102	signaling receptor binding		0.00016917	0.018326	38/412 9.2%	520/10447 4.9%	SHC4 IL20 TNXB CXCL8 SEMA3A LAMA4 IL24 TNC CTGF SOCS1 SLIT1 S100A12 APOB TNFSF18 VAV3 PTPN1 IL11 IL33 EDN1 VWF FEM1B TGFB3 ITGA2 IL34 SORBS1 NGF PGF EREG FAP ARTN BAMBI CLCF1 IFNK F2RL1 ANGPTL4 ITGA5 HBEGF S100A7
DLA	Functions	48018	receptor ligand activity		0.00036805	0.034177	18/412 4.3%	185/10447 1.7%	TNFSF18 IL11 IL33 EDN1 IL20 CXCL8 TGFB3 SEMA3A IL34 IL24 NGF PGF CTGF EREG ARTN CLCF1 IFNK HBEGF
DLA	Functions	30546	signaling receptor activator activity		0.00044745	0.036355	18/412 4.3%	188/10447 1.7%	TNFSF18 IL11 IL33 EDN1 IL20 CXCL8 TGFB3 SEMA3A IL34 IL24 NGF PGF CTGF EREG ARTN CLCF1 IFNK HBEGF
DLA	Functions	4888	transmembrane signaling receptor activity		0.00055257	0.037301	26/412 6.3%	328/10447 3.1%	FLG PTGER4 PTPRR HPGD NPR1 IL1RL1 P2RY6 GRM5 P2RY2 S1PR3 S1PR5 CCR4 KLRC2 IL10RA GPR3 MERTK SORCS2 TLR1 GPR162 CLDN4 PTPRA P2RX2 F2RL1 OR2A7 ULBP2 ULBP1
DLA	Functions	8330	protein tyrosine/threonine phosphatase activity		0.00057386	0.037301	3/412 0.7%	5/10447 0.0%	DUSP4 DUSP2 DUSP1
DLA	Functions	30545	signaling receptor regulator activity		0.00073541	0.043456	18/412 4.3%	196/10447 1.8%	TNFSF18 IL11 IL33 EDN1 IL20 CXCL8 TGFB3 SEMA3A IL34 IL24 NGF PGF CTGF EREG ARTN CLCF1 IFNK HBEGF
DLA	Functions	17017	MAP kinase tyrosine/serine/threonine phosphatase activity		0.00091688	0.049664	4/412 0.9%	12/10447 0.1%	DUSP4 DUSP2 DUSP1 DUSP16
DLA	Processes	32501	multicellular organismal process		1.8638e-10	4.0552e-07	156/392 39.7%	2496/9774 25.5%	FOXA1 EHF UPK2 TNC PLAT AHR BEST2 CLDN1 CLU ACTG2 CTGF AMOT RGS2 GJA5 LIPH PLCE1 SOX9 TGM2 HES6 SLC15A1 GUCY1A1 FST SPINK5 PRKCA OVOL1 POU3F1 EML2 PGF HIC1 LOR PIAS1 EREG ACE2 ARC PSG5 LOX DDIT3 MFNG FKBP4 MYL9 VCL S100A7 FLG KMT2E SEMA7A DLX2 DLX5 NPR1 TSHZ1 SH2D2A TACSTD2 CSF2RB APCDD1 KALRN MTM1 ZFP57 SOCS1 MAP2 PLAC1 KCNN4 APOB WNT10B SMAD1 HSPA5 TGFB3 TFPI2 IFNLR1 FANCB PBX1 FOSL1 EXT1 RCAN1…
DLA	Processes	8544	epidermis development	x	2.8181e-10	4.0552e-07	25/392 6.3%	141/9774 1.4%	FLG SPRR4 CLIC5 SPRR3 KLK5 APCDD1 CTGF SCEL SOX9 TGM5 LAMB3 FST SPINK5 EMP1 KRT34 GRHL3 OVOL1 POU3F1 LOR EREG PC ERCC2 IRF6 SPRR1A S100A7
DLA	Processes	9888	tissue development		1.1342e-09	1.0881e-06	55/392 14.0%	576/9774 5.8%	FOXA1 CLIC5 EHF ECM1 UPK2 TNC CTGF CALB1 GJA5 SOX9 TGM5 TGM2 ARG2 EDN1 KRT4 FST ITGA2 SPINK5 EMP1 KRT34 PRKCA OVOL1 POU3F1 PGF LOR EREG ARC COL2A1 ITGA5 IRF6 VCL S100A7 FLG SPRR4 SPRR3 DLX2 DLX5 SEMA3A KLK5 APCDD1 SCEL WNT10B SMAD1 LAMB3 FEM1B GRHL3 PBX1 EXT1 RCAN1 PC NR4A3 ID2 ERCC2 CYP1A1 SPRR1A
DLA	Processes	60429	epithelium development	x	1.0542e-08	7.5851e-06	39/392 9.9%	358/9774 3.6%	FLG SPRR4 FOXA1 CLIC5 SPRR3 EHF UPK2 DLX5 SEMA3A TNC APCDD1 SCEL CALB1 GJA5 SOX9 TGM2 SMAD1 ARG2 EDN1 KRT4 FEM1B FST ITGA2 SPINK5 EMP1 POU3F1 PBX1 PGF LOR EREG PC ID2 ERCC2 CYP1A1 ITGA5 IRF6 SPRR1A VCL S100A7
DLA	Processes	48856	anatomical structure development		1.8123e-08	9.8253e-06	130/392 33.1%	2082/9774 21.3%	FOXA1 EHF UPK2 SERPINE1 TNC PLAT AHR CLDN1 CLU CTGF AMOT GJA5 PLCE1 SOX9 TGM5 IER3 TGM2 HES6 KRT4 FST SPINK5 PRKCA OVOL1 POU3F1 PGF HIC1 LOR EREG ARC LOX DDIT3 MFNG FKBP4 VCL S100A7 FLG KMT2E SEMA7A DLX2 DLX5 TSHZ1 SH2D2A KLK5 APCDD1 KALRN MTM1 ZFP57 SOCS1 MAP2 PLAC1 APOB WNT10B SMAD1 HSPA5 TGFB3 FANCB PBX1 EXT1 RCAN1 NR4A3 BCL6 ARTN ID2 CYP1A1 SPRR1A CLIC5 PTPRR ECM1 CXCL8 DOC2A RND1 SPRED3 CYP2…
DLA	Processes	30855	epithelial cell differentiation	x	2.0484e-08	9.8253e-06	23/392 5.8%	148/9774 1.5%	FLG SPRR4 FOXA1 CLIC5 SPRR3 EHF KRT4 UPK2 DLX5 FEM1B ITGA2 SPINK5 EMP1 POU3F1 LOR EREG SCEL ERCC2 CYP1A1 SOX9 IRF6 SPRR1A S100A7
DLA	Processes	51239	regulation of multicellular organismal process		3.6829e-08	1.5142e-05	54/392 13.7%	618/9774 6.3%	ECM1 BTG1 IL20 SERPINE1 TNC ETS1 CTGF AMOT PLCE1 SOX9 ARG2 EDN1 RSAD2 SPHK1 FST ITGA2 SPINK5 PRKCA NGF F3 PGF EREG RHOB TLR1 ACE2 TNNT3 ANGPTL4 MYL9 HBEGF FLG PTGER4 DLX2 NPR1 SEMA3A AMIGO1 LAMA4 P2RY2 SLIT1 S1PR3 SMAD1 TGFB3 NOS3 FOXJ1 FANCB PBX1 KLF2 PC BCL6 FAP BAMBI ID2 REL F2RL1 NFE2L2
DLA	Processes	32502	developmental process		5.8422e-08	2.1017e-05	136/392 34.6%	2251/9774 23.0%	FOXA1 EHF STEAP4 UPK2 SERPINE1 TNC PLAT AHR CLDN1 CLU CTGF AMOT RGS2 GJA5 PLCE1 SOX9 TGM5 IER3 TGM2 HES6 KRT4 FST SPINK5 PRKCA OVOL1 POU3F1 PGF HIC1 LOR PIAS1 EREG ARC LOX DDIT3 MFNG FKBP4 VCL S100A7 FLG KMT2E SEMA7A DLX2 DLX5 TSHZ1 SH2D2A KLK5 APCDD1 KALRN MTM1 ZFP57 SOCS1 MAP2 PLAC1 APOB WNT10B SMAD1 HSPA5 TGFB3 FANCB PBX1 EXT1 RCAN1 NR4A3 BCL6 ARTN ID2 CYP1A1 SPRR1A CLIC5 PTPRR ECM1 BTG1 CXCL8…
DLA	Processes	48519	negative regulation of biological process		1.2188e-07	3.8974e-05	105/392 26.7%	1619/9774 16.5%	FOXA1 SERPINE1 PLAT IFI30 BACH1 CLU ETS1 AMOT RGS2 SESN1 SOX9 IER3 SLC15A1 KRT4 FST SPINK5 KCTD1 PRKCA OVOL1 PIAS1 EREG ERN2 ARC FKBP4 VCL FLG DLX2 RRAD NPR1 DCUN1D3 APCDD1 SOCS1 NUAK2 BAG3 MAP2 ZBED6 TNFSF18 WNT10B SMAD1 HSPA5 GADD45A TGFB3 IFNLR1 FANCB PBX1 FOSL1 YRDC NR4A1 BCL6 CILP BAMBI ID2 BHLHE40 ECM1 CDKN1B BTG1 CXCL8 TNFAIP3 SIRPB2 RND1 CYP26B1 ADAMTS1 TRPS1 TIMP1 JARID2 IL11 ARG2 EDN1 S…
DLA	Processes	48523	negative regulation of cellular process		1.6444e-07	4.7325e-05	98/392 25.0%	1485/9774 15.1%	FOXA1 SERPINE1 PLAT IFI30 BACH1 CLU ETS1 RGS2 SESN1 SOX9 IER3 KRT4 FST KCTD1 PRKCA OVOL1 PIAS1 EREG ERN2 ARC FKBP4 VCL FLG DLX2 RRAD NPR1 DCUN1D3 APCDD1 SOCS1 NUAK2 BAG3 MAP2 ZBED6 TNFSF18 WNT10B SMAD1 HSPA5 GADD45A TGFB3 IFNLR1 FANCB PBX1 FOSL1 NR4A1 BCL6 CILP BAMBI ID2 BHLHE40 ECM1 CDKN1B BTG1 CXCL8 TNFAIP3 SIRPB2 RND1 CYP26B1 ADAMTS1 TRPS1 TIMP1 JARID2 IL11 EDN1 SPHK1 NGF F3 RHOB COL2A1 IFNK A…
DLA	Processes	42127	regulation of cell population proliferation		2.478e-07	6.4834e-05	53/392 13.5%	637/9774 6.5%	ECM1 CDKN1B BTG1 CXCL8 SERPINE1 SIRPB2 IFI30 CLU ETS1 CTGF ADAMTS1 SESN1 TIMP1 SOX9 JARID2 TGM2 IL11 EDN1 KRT4 SPHK1 ITGA2 PRKCA NGF F3 PGF CDC25B EREG ACE2 IFNK ARHGEF2 IRF6 FLG DLX5 TTK SLIT1 S1PR3 SMAD1 EGR4 TGFB3 NOS3 IL34 FOXJ1 IFNLR1 FANCB DHRS2 PBX1 FOSL1 FABP3 BCL6 FAP ID2 HSPA1B HSPA1A
DLA	Processes	30154	cell differentiation		3.6633e-07	8.7858e-05	78/392 19.8%	1110/9774 11.3%	FOXA1 CLIC5 EHF PTPRR STEAP4 UPK2 CLU CTGF AMOT RND1 RGS2 CYP26B1 CSRP2 CCIN TIMP1 SOX9 JARID2 CCR4 HES6 IL11 EDN1 KRT4 FST ITGA2 SPINK5 EMP1 PRKCA NGF POU3F1 PGF LOR EREG RHOB COL2A1 MMP19 ANGPTL4 IRF6 S100A7 FLG KMT2E SPRR4 SPRR3 SLFN5 SEMA7A DLX2 DLX5 SEMA3A SH2D2A AMIGO1 LAMA4 SEMA3B TUBD1 KALRN SCEL SOCS1 MAP2 NHS SLIT1 WNT10B SMAD1 LAMB3 FEM1B NOS3 FANCB DHRS2 PBX1 EXT1 RCAN1 BCL6 FAP ARTN …
DLA	Processes	50789	regulation of biological process		4.1509e-07	9.1894e-05	250/392 63.7%	5038/9774 51.5%	EHF SERPINE1 IFI30 BACH1 BACH2 LIPH MYB PLCE1 SOX9 IER3 HES6 KRT4 RSAD2 PRKCA ANK3 OVOL1 EREG ACE2 ARC DDIT3 KIF20B MYL9 FLG RRAD DCUN1D3 TSHZ1 SH2D2A KLK5 APCDD1 KALRN NUAK2 MAP2 S100A12 STK38L SLAMF7 KCNN4 APOB ZBED6 TNFSF18 WNT10B EGR4 GADD45A PDE2A NR1D2 IFNLR1 ELL2 PBX1 FOSL1 EXT1 STAG1 CILP ARTN ID2 REL FERMT2 LIN54 ECM1 CDKN1B ZNF251 BTG1 IL20 DOC2A ATF7IP2 STON2 SH3RF1 IFIH1 AKAP12 TIMP1 …
DLA	Processes	70887	cellular response to chemical stimulus		4.791e-07	9.6764e-05	44/392 11.2%	495/9774 5.0%	FLG CXCL8 HPGD DERL3 SERPINE1 FHL2 CTGF SOCS1 GNG4 P2RY2 SLIT1 S100A12 DUOX2 WNT10B SMAD1 HSPA5 DUSP1 TGFB3 NOS3 SPHK1 FST ITGA2 PRKCA SORBS1 F3 DHRS2 PGF KLF2 PIAS1 EREG SULT1B1 CDK7 STAG1 PTPRA DDIT3 CLCF1 ID2 KLF9 CYP1A1 IFNK FKBP4 S100A9 NFE2L2 CDK5R1
DLA	Processes	65007	biological regulation		5.0433e-07	9.6764e-05	260/392 66.3%	5305/9774 54.2%	EHF SERPINE1 ABCA12 IFI30 BACH1 BACH2 LIPH MYB PLCE1 SOX9 IER3 HES6 KRT4 RSAD2 PRKCA ANK3 OVOL1 EREG ACE2 ARC DDIT3 KIF20B MYL9 FLG RRAD DCUN1D3 TSHZ1 SH2D2A KLK5 APCDD1 KALRN NUAK2 MAP2 S100A12 STK38L SLAMF7 KCNN4 APOB ZBED6 TNFSF18 WNT10B EGR4 GADD45A PDE2A NR1D2 IFNLR1 ELL2 PBX1 FOSL1 EXT1 SULT1B1 STAG1 CILP ARTN ID2 CYP1A1 REL FERMT2 LIN54 ECM1 CDKN1B ZNF251 BTG1 IL20 DOC2A ATF7IP2 STON2 SH3R…
DLA	Processes	48869	cellular developmental process		5.8838e-07	0.00010365	78/392 19.8%	1123/9774 11.4%	FOXA1 CLIC5 EHF PTPRR STEAP4 UPK2 CLU CTGF AMOT RND1 RGS2 CYP26B1 CSRP2 CCIN TIMP1 SOX9 JARID2 CCR4 HES6 IL11 EDN1 KRT4 FST ITGA2 SPINK5 EMP1 PRKCA NGF POU3F1 PGF LOR EREG RHOB COL2A1 MMP19 ANGPTL4 IRF6 S100A7 FLG KMT2E SPRR4 SPRR3 SLFN5 SEMA7A DLX2 DLX5 SEMA3A SH2D2A AMIGO1 LAMA4 SEMA3B TUBD1 KALRN SCEL SOCS1 MAP2 NHS SLIT1 WNT10B SMAD1 LAMB3 FEM1B NOS3 FANCB DHRS2 PBX1 EXT1 RCAN1 BCL6 FAP ARTN …
DLA	Processes	50793	regulation of developmental process		6.2003e-07	0.00010365	48/392 12.2%	568/9774 5.8%	FLG FOXA1 DLX2 ECM1 BTG1 IL20 FBLIM1 DLX5 NPR1 SEMA3A AMIGO1 LAMA4 SERPINE1 CLU KALRN ETS1 AMOT PALMD BOC SLIT1 MYH14 SOX9 APOB S1PR5 WNT10B SMAD1 EDN1 TGFB3 NOS3 SPHK1 FST SPINK5 FOXJ1 PRKCA NGF F3 PBX1 PGF PIAS1 EREG RHOB BCL6 BAMBI ID2 ANGPTL4 FERMT2 NFE2L2 CDK5R1
DLA	Processes	9913	epidermal cell differentiation	x	6.4829e-07	0.00010365	13/392 3.3%	61/9774 0.6%	FLG SPRR4 CLIC5 SPRR3 SPINK5 POU3F1 LOR EREG SCEL ERCC2 IRF6 SPRR1A S100A7
DLA	Processes	65008	regulation of biological quality		8.4362e-07	0.00012779	71/392 18.1%	997/9774 10.2%	FOXA1 DOC2A SERPINE1 TNC PLAT ABCA12 BEST2 IFI30 AMOT CYP26B1 CALB1 LIPH PLCE1 TIMP1 CCR4 TGM2 IL11 EDN1 VWF SPHK1 FST ITGA2 PLAUR PRKCA NGF F3 ACE2 ARC COL2A1 DDIT3 HAP1 ANGPTL4 SLC25A4 KMT2E KANK1 FBLIM1 NPR1 SEMA3A MTM1 PALMD SV2A P2RY2 SLIT1 MYH14 S1PR3 BCO2 KCNN4 APOB CRYM DUOX2 WNT10B SMAD1 IL10RB NOS3 IL10RA TFPI2 IFNLR1 DHRS2 SULT1B1 PC BCL6 FAP P2RX2 BAMBI ID2 JMY BHLHE40 ERCC2 CYP1A1 F2…
DLA	Processes	22603	regulation of anatomical structure morphogenesis		9.1865e-07	0.00013219	25/392 6.3%	209/9774 2.1%	FLG ECM1 BTG1 FBLIM1 NPR1 SEMA3A AMIGO1 SERPINE1 AMOT PALMD SLIT1 MYH14 SMAD1 NOS3 SPHK1 SPINK5 FOXJ1 NGF F3 PGF RHOB BCL6 BAMBI ANGPTL4 FERMT2
DLA	Processes	10033	response to organic substance		1.0107e-06	0.00013851	62/392 15.8%	831/9774 8.5%	FOXA1 BTG1 SERPINE1 FHL2 PLAT CLU CTGF DUSP4 DUSP1 SPHK1 FST ITGA2 PRKCA NGF F3 PGF PIAS1 EREG TLR1 LOX DDIT3 IFNK MMP19 ACSBG1 FKBP4 S100A7 FLG KMT2E HPGD DERL3 DNAJB1 SOCS1 GNG4 DNAJB4 P2RY2 SLIT1 APOB DUOX2 WNT10B SMAD1 HSPA1L HSPA5 TGFB3 NOS3 IL10RA HSPA6 FANCB SORBS1 KLF2 FOSL1 FABP3 CDK7 STAG1 NR4A3 PTPRA CLCF1 KLF9 CYP1A1 HSPA1B HSPA1A NFE2L2 CDK5R1
DLA	Processes	7275	multicellular organism development		1.1162e-06	0.0001453	117/392 29.8%	1947/9774 19.9%	FOXA1 EHF UPK2 TNC PLAT AHR CLDN1 CLU CTGF AMOT GJA5 PLCE1 SOX9 TGM2 HES6 FST SPINK5 PRKCA POU3F1 PGF HIC1 LOR EREG ARC LOX DDIT3 MFNG FKBP4 S100A7 FLG KMT2E SEMA7A DLX2 DLX5 TSHZ1 SH2D2A APCDD1 KALRN MTM1 ZFP57 SOCS1 MAP2 PLAC1 APOB WNT10B SMAD1 HSPA5 TGFB3 FANCB PBX1 EXT1 RCAN1 NR4A3 BCL6 ARTN ID2 CYP1A1 SPRR1A CLIC5 PTPRR ECM1 CXCL8 DOC2A RND1 SPRED3 CYP26B1 CSRP2 CALB1 ADAMTS1 TRPS1 CCIN TIMP…
DLA	Processes	42221	response to chemical		1.1612e-06	0.0001453	79/392 20.1%	1162/9774 11.8%	FOXA1 BTG1 CXCL8 SERPINE1 TNC FHL2 PLAT AHR CLU ETS1 CTGF AMOT CCR4 DUSP4 DUSP1 SPHK1 FST ITGA2 PLAUR PRKCA NGF F3 PGF PIAS1 EREG TLR1 LOX DDIT3 IFNK MMP19 ACSBG1 FKBP4 S100A9 S100A7 ABCG2 FLG KMT2E HPGD SEMA3A DERL3 SEMA3B DNAJB1 SOCS1 GNG4 DNAJB4 P2RY2 SLIT1 S100A12 APOB DUOX2 WNT10B SMAD1 HSPA1L HSPA5 TGFB3 NOS3 IL10RA HSPA6 FANCB SORBS1 DHRS2 SOD3 KLF2 FOSL1 EXT1 SULT1B1 FABP3 CDK7 STAG1 NR4A…
DLA	Processes	9611	response to wounding	x	1.2244e-06	0.00014683	22/392 5.6%	171/9774 1.7%	IL11 SPRR3 SMAD1 VWF IL10RB TGFB3 IL10RA ITGA2 TFPI2 TNC PLAUR IFNLR1 GRHL3 PLAT F3 CLU CTGF EREG LOX P2RY2 CYP1A1 ITGA5
DLA	Processes	43588	skin development		1.332e-06	0.00015334	16/392 4.0%	97/9774 0.9%	FLG SPRR4 SPRR3 FST ITGA2 SPINK5 APCDD1 POU3F1 LOR EREG SCEL ERCC2 SOX9 IRF6 SPRR1A S100A7
DLA	Processes	42060	wound healing	x	1.5816e-06	0.00017507	18/392 4.5%	122/9774 1.2%	IL11 SPRR3 SMAD1 VWF IL10RB TGFB3 IL10RA ITGA2 TFPI2 PLAUR IFNLR1 GRHL3 PLAT F3 EREG LOX P2RY2 ITGA5
DLA	Processes	48513	animal organ development		1.9896e-06	0.00021208	74/392 18.8%	1079/9774 11.0%	FOXA1 CLIC5 ECM1 TNC AHR CLU CTGF CALB1 ADAMTS1 GJA5 PLCE1 TIMP1 SOX9 JARID2 TGM2 IL11 ARG2 EDN1 VWF SPHK1 FST ITGA2 SPINK5 PRKCA FOXL1 POU3F1 PGF LOR EREG COL2A1 LOX DDIT3 MMP19 ACSBG1 HAP1 IRF6 FKBP4 HBEGF S100A7 FLG KMT2E SPRR4 SPRR3 DLX2 DLX5 SEMA3A TSHZ1 APCDD1 MTM1 SCEL SOCS1 NHS SLIT1 PLAC1 WNT10B SMAD1 HSPA5 FEM1B TGFB3 NOS3 FANCB DHRS2 TBX4 PBX1 EXT1 RCAN1 NR4A3 BCL6 CLCF1 ID2 ERCC2 CYP1…
DLA	Processes	48731	system development		2.4067e-06	0.00024737	98/392 25.0%	1572/9774 16.0%	FOXA1 TNC PLAT AHR CLDN1 CLU CTGF AMOT GJA5 PLCE1 SOX9 TGM2 HES6 FST SPINK5 PRKCA POU3F1 PGF LOR EREG LOX DDIT3 FKBP4 S100A7 FLG KMT2E SEMA7A DLX2 DLX5 TSHZ1 SH2D2A APCDD1 KALRN MTM1 SOCS1 MAP2 PLAC1 APOB WNT10B SMAD1 HSPA5 TGFB3 FANCB PBX1 EXT1 RCAN1 NR4A3 BCL6 ARTN ID2 CYP1A1 SPRR1A CLIC5 PTPRR ECM1 CXCL8 DOC2A RND1 CALB1 ADAMTS1 TRPS1 TIMP1 JARID2 CCR4 VAV3 IL11 ARG2 EDN1 VWF SPHK1 ITGA2 FOXL1…
DLA	Processes	10941	regulation of cell death		2.535e-06	0.00025158	43/392 10.9%	509/9774 5.2%	FLG BTG1 BCL2A1 DCUN1D3 SERPINE1 TNFAIP3 CLU CTGF IFIH1 CASP9 NUAK2 BAG3 SOX9 IER3 TNFSF18 WNT10B CARD10 HSPA5 DUSP1 FEM1B TGFB3 NOS3 SPHK1 CARD6 NGF F3 DHRS2 FOSL1 NR4A1 ARC COL2A1 PC BCL6 DDIT3 CLCF1 JMY ERCC2 LCN2 ANGPTL4 SLC25A4 HSPA1B HSPA1A CDK5R1
DLA	Processes	50878	regulation of body fluid levels		3.5958e-06	0.00034496	18/392 4.5%	129/9774 1.3%	IL11 EDN1 VWF IL10RB NPR1 NOS3 IL10RA ITGA2 SERPINE1 TFPI2 PLAUR IFNLR1 PLAT F3 PC FAP F2RL1 KCNN4
DLA	Processes	48545	response to steroid hormone		5.5353e-06	0.00051389	19/392 4.8%	146/9774 1.4%	DUSP1 TGFB3 SPHK1 SERPINE1 FHL2 PRKCA PLAT NGF CTGF PIAS1 FOSL1 CDK7 STAG1 SOCS1 LOX KLF9 SLIT1 ACSBG1 FKBP4
DLA	Processes	51128	regulation of cellular component organization	x	6.5045e-06	0.000585	43/392 10.9%	528/9774 5.4%	KANK1 CDKN1B BTG1 RRAD NPR1 SEMA3A DCUN1D3 AMIGO1 SERPINE1 TTK STON2 AHR CLU KALRN CTGF AMOT MAP2 GNG4 P2RY2 SLIT1 PLCE1 STK38L JARID2 SMAD1 CENPV EDN1 TGFB3 SPHK1 ITGA2 PRKCA GPR3 NGF EREG PC BCL6 FAP JMY ARHGEF2 FKBP4 KIF20B HSPA1B HBEGF HSPA1A
DLA	Processes	42981	regulation of apoptotic process		7.5455e-06	0.00065806	41/392 10.4%	496/9774 5.0%	FLG BTG1 BCL2A1 DCUN1D3 SERPINE1 TNFAIP3 CLU IFIH1 CASP9 NUAK2 BAG3 SOX9 IER3 TNFSF18 WNT10B CARD10 HSPA5 DUSP1 FEM1B TGFB3 NOS3 SPHK1 CARD6 NGF F3 DHRS2 FOSL1 NR4A1 ARC COL2A1 PC BCL6 DDIT3 CLCF1 JMY ERCC2 LCN2 ANGPTL4 HSPA1B HSPA1A CDK5R1
DLA	Processes	51094	positive regulation of developmental process		8.1475e-06	0.00068966	27/392 6.8%	266/9774 2.7%	FLG FOXA1 ECM1 BTG1 IL20 DLX5 AMIGO1 SERPINE1 CLU ETS1 AMOT BOC APOB SMAD1 EDN1 TGFB3 NOS3 SPHK1 FST PRKCA NGF F3 PIAS1 RHOB BAMBI ID2 ANGPTL4
DLA	Processes	50920	regulation of chemotaxis		8.6985e-06	0.00071526	10/392 2.5%	45/9774 0.4%	CXCL8 ITGA2 SEMA3A SERPINE1 SLIT1 F2RL1 PRKCA F3 CCR4 S100A7
DLA	Processes	50794	regulation of cellular process		9.3824e-06	0.00075007	236/392 60.2%	4840/9774 49.5%	EHF SERPINE1 IFI30 BACH1 BACH2 MYB PLCE1 SOX9 IER3 HES6 KRT4 PRKCA ANK3 OVOL1 EREG ACE2 ARC DDIT3 KIF20B FLG RRAD DCUN1D3 TSHZ1 SH2D2A KLK5 APCDD1 KALRN NUAK2 MAP2 S100A12 STK38L SLAMF7 KCNN4 APOB ZBED6 TNFSF18 WNT10B EGR4 GADD45A PDE2A NR1D2 IFNLR1 ELL2 PBX1 FOSL1 EXT1 STAG1 CILP ARTN ID2 REL LIN54 ECM1 CDKN1B ZNF251 BTG1 IL20 DOC2A ATF7IP2 STON2 SH3RF1 IFIH1 AKAP12 TIMP1 JARID2 CCR4 MCF2L2 DUSP…
DLA	Processes	43067	regulation of programmed cell death		1.0106e-05	0.00078605	41/392 10.4%	502/9774 5.1%	FLG BTG1 BCL2A1 DCUN1D3 SERPINE1 TNFAIP3 CLU IFIH1 CASP9 NUAK2 BAG3 SOX9 IER3 TNFSF18 WNT10B CARD10 HSPA5 DUSP1 FEM1B TGFB3 NOS3 SPHK1 CARD6 NGF F3 DHRS2 FOSL1 NR4A1 ARC COL2A1 PC BCL6 DDIT3 CLCF1 JMY ERCC2 LCN2 ANGPTL4 HSPA1B HSPA1A CDK5R1
DLA	Processes	48518	positive regulation of biological process		1.2038e-05	0.00087305	94/392 23.9%	1546/9774 15.8%	FOXA1 EHF ECM1 BTG1 IL20 CXCL8 SERPINE1 FHL2 SIRPB2 AHR CLU ETS1 CTGF AMOT AKAP12 CASP9 BOC TIMP1 SOX9 JARID2 CCR4 TGM2 VAV3 IL11 CARD10 EDN1 DUSP1 SPHK1 FST ITGA2 PRKCA NGF POU3F1 F3 PGF PIAS1 CDC25B EREG RHOB TLR1 DDIT3 IFNK ANGPTL4 ITGA5 IRF6 HBEGF S100A7 CREB5 FLG KMT2E DLX2 DLX5 DCUN1D3 AMIGO1 KLK5 TTK P2RY6 P2RY2 S100A12 S1PR3 KCNN4 APOB WNT10B SMAD1 CENPV COL26A1 EGR4 HSPA5 TGFB3 NOS3 IL34…
DLA	Processes	32101	regulation of response to external stimulus		1.2309e-05	0.00087305	20/392 5.1%	168/9774 1.7%	EDN1 IL20 CXCL8 NOS3 ITGA2 SEMA3A SERPINE1 PRKCA IFNLR1 F3 EREG ACE2 PC BCL6 IFNK SLIT1 F2RL1 CCR4 S100A7 TGM2
DLA	Processes	48583	regulation of response to stimulus		1.2367e-05	0.00087305	62/392 15.8%	897/9774 9.1%	FOXA1 ECM1 IL20 CXCL8 SERPINE1 TNFAIP3 CLU SH3RF1 AKAP12 SPRED3 RGS2 CYP26B1 PLCE1 CCR4 MCF2L2 ARFGEF3 TGM2 VAV3 IL11 PLEKHG1 EDN1 SPHK1 FST ITGA2 SPINK5 PRKCA FOXL1 F3 EREG ACE2 RASA2 IFNK ITGA5 ARHGEF2 HBEGF S100A7 FLG SEMA3A RGS16 KLK5 TTK APCDD1 KALRN IL1RL1 SOCS1 GNG4 SLIT1 S100A12 PTPN1 HSPA5 TGFB3 NOS3 FOXJ1 IFNLR1 PC BCL6 CILP P2RX2 BAMBI REL F2RL1 MAP3K14
DLA	Processes	45766	positive regulation of angiogenesis		1.2741e-05	0.00087305	8/392 2.0%	29/9774 0.2%	ECM1 BTG1 NOS3 SPHK1 SERPINE1 ANGPTL4 F3 RHOB
DLA	Processes	1904018	positive regulation of vasculature development		1.2741e-05	0.00087305	8/392 2.0%	29/9774 0.2%	ECM1 BTG1 NOS3 SPHK1 SERPINE1 ANGPTL4 F3 RHOB
DLA	Processes	30216	keratinocyte differentiation		1.3141e-05	0.00087399	10/392 2.5%	47/9774 0.4%	FLG SPRR4 SPRR3 SCEL IRF6 POU3F1 SPRR1A LOR S100A7 EREG
DLA	Processes	33993	response to lipid		1.3362e-05	0.00087399	28/392 7.1%	289/9774 2.9%	KMT2E FOXA1 SERPINE1 FHL2 PLAT CTGF SOCS1 SLIT1 WNT10B DUSP1 TGFB3 NOS3 SPHK1 IL10RA PRKCA NGF F3 PIAS1 FOSL1 FABP3 CDK7 STAG1 LOX KLF9 CYP1A1 ACSBG1 FKBP4 S100A7
DLA	Processes	40017	positive regulation of locomotion		1.3827e-05	0.0008843	15/392 3.8%	103/9774 1.0%	EDN1 CXCL8 SPHK1 ITGA2 SERPINE1 PRKCA F3 AMOT P2RY6 PC P2RY2 F2RL1 CCR4 HBEGF S100A7
DLA	Processes	50926	regulation of positive chemotaxis		1.4734e-05	0.00090224	6/392 1.5%	15/9774 0.1%	CXCL8 ITGA2 F2RL1 PRKCA F3 CCR4
DLA	Processes	50927	positive regulation of positive chemotaxis		1.4734e-05	0.00090224	6/392 1.5%	15/9774 0.1%	CXCL8 ITGA2 F2RL1 PRKCA F3 CCR4
DLA	Processes	45765	regulation of angiogenesis		1.5608e-05	0.00091674	11/392 2.8%	58/9774 0.5%	ECM1 BTG1 NPR1 NOS3 SPHK1 SERPINE1 SPINK5 ANGPTL4 F3 RHOB AMOT
DLA	Processes	1901342	regulation of vasculature development		1.5608e-05	0.00091674	11/392 2.8%	58/9774 0.5%	ECM1 BTG1 NPR1 NOS3 SPHK1 SERPINE1 SPINK5 ANGPTL4 F3 RHOB AMOT
DLA	Processes	90257	regulation of muscle system process		1.8505e-05	0.0010652	11/392 2.8%	59/9774 0.6%	ARG2 EDN1 NOS3 SPHK1 ITGA2 TNNT3 TNC PLCE1 PRKCA MYL9 CTGF
DLA	Processes	2000026	regulation of multicellular organismal development		1.9423e-05	0.0010961	29/392 7.3%	311/9774 3.1%	FLG DLX2 ECM1 BTG1 IL20 NPR1 SEMA3A AMIGO1 LAMA4 SERPINE1 ETS1 AMOT SLIT1 SOX9 SMAD1 TGFB3 NOS3 SPHK1 FST SPINK5 FOXJ1 PRKCA NGF F3 RHOB BCL6 ID2 ANGPTL4 NFE2L2
DLA	Processes	9719	response to endogenous stimulus		2.1949e-05	0.0012148	37/392 9.4%	448/9774 4.5%	FLG BTG1 HPGD SERPINE1 FHL2 PLAT CTGF SOCS1 GNG4 P2RY2 SLIT1 SMAD1 DUSP1 TGFB3 NOS3 SPHK1 FST ITGA2 PRKCA FANCB SORBS1 NGF F3 PGF PIAS1 EREG FOSL1 FABP3 CDK7 STAG1 NR4A3 LOX PTPRA KLF9 MMP19 ACSBG1 FKBP4
DLA	Processes	8285	negative regulation of cell population proliferation		2.5055e-05	0.0013605	28/392 7.1%	299/9774 3.0%	CDKN1B BTG1 CXCL8 SIRPB2 IFI30 ETS1 ADAMTS1 SESN1 SLIT1 JARID2 SMAD1 KRT4 TGFB3 NOS3 FOXJ1 PRKCA IFNLR1 FANCB DHRS2 EREG FOSL1 FABP3 BCL6 FAP IFNK IRF6 HSPA1B HSPA1A
DLA	Processes	6950	response to stress		2.674e-05	0.0014251	80/392 20.4%	1283/9774 13.1%	BTG1 CXCL8 NCF2 SERPINE1 TNC PLAT AHR LSP1 BACH1 CLU CTGF IFIH1 SESN1 CCR4 IL11 EDN1 VWF RSAD2 DUSP1 SPHK1 ITGA2 PLAUR PRKCA NGF F3 PGF EREG TLR1 ERN2 LOX DDIT3 IFNK HAP1 ANGPTL4 ITGA5 S100A9 S100A7 SPRR3 DERL3 DNAJB1 IL1RL1 NUAK2 DNAJB4 P2RY2 S100A12 SLAMF7 S1PR3 FCGR1A KCNN4 DUOX2 SMAD1 HSPA1L FANCM HSPA5 KLRC2 IL10RB GADD45A TGFB3 NOS3 IL10RA TFPI2 HSPA6 IFNLR1 GRHL3 FANCB DHRS2 SOD3 KLF2 TICR…
DLA	Processes	50921	positive regulation of chemotaxis		2.8088e-05	0.0014698	8/392 2.0%	32/9774 0.3%	CXCL8 ITGA2 SERPINE1 F2RL1 PRKCA F3 CCR4 S100A7
DLA	Processes	9725	response to hormone		2.9225e-05	0.001502	31/392 7.9%	351/9774 3.5%	BTG1 SERPINE1 FHL2 PLAT CTGF SOCS1 GNG4 SLIT1 DUSP1 TGFB3 NOS3 SPHK1 ITGA2 PRKCA FANCB SORBS1 NGF PGF PIAS1 EREG FOSL1 FABP3 CDK7 STAG1 NR4A3 LOX PTPRA KLF9 MMP19 ACSBG1 FKBP4
DLA	Processes	6937	regulation of muscle contraction		3.3558e-05	0.0016944	10/392 2.5%	52/9774 0.5%	ARG2 EDN1 SPHK1 ITGA2 TNNT3 TNC PLCE1 PRKCA MYL9 CTGF
DLA	Processes	50896	response to stimulus		4.6667e-05	0.0023156	169/392 43.1%	3293/9774 33.6%	FOXA1 NCF2 SERPINE1 TNC PLAT AHR BACH1 CLU ETS1 CTGF AMOT RAB43 SESN1 PLCE1 TGM2 PPP1R16B CARD10 GUCY1A1 FKBPL RSAD2 FST PRKCA ANK3 PGF PIAS1 EREG ERN2 LOX RAB37 DDIT3 FKBP4 S100A9 S100A7 ABCG2 FLG KMT2E SEMA7A RRAD NPR1 DCUN1D3 SH2D2A TACSTD2 CSF2RB KALRN SOCS1 NUAK2 S100A12 STK38L SLAMF7 KCNN4 APOB TNFSF18 WNT10B SMAD1 FANCM HSPA5 KLRC2 GADD45A TGFB3 TFPI2 PDE2A HSPA6 IFNLR1 FANCB CORO2A FOSL1 …
DLA	Processes	71310	cellular response to organic substance		4.9423e-05	0.0024108	33/392 8.4%	395/9774 4.0%	FLG HPGD DERL3 SERPINE1 FHL2 CTGF SOCS1 GNG4 P2RY2 SLIT1 DUOX2 WNT10B SMAD1 HSPA5 DUSP1 TGFB3 NOS3 FST ITGA2 SORBS1 PGF KLF2 PIAS1 EREG CDK7 STAG1 PTPRA DDIT3 CLCF1 KLF9 IFNK FKBP4 NFE2L2
DLA	Processes	44057	regulation of system process		5.7942e-05	0.0027642	15/392 3.8%	116/9774 1.1%	ARG2 EDN1 NOS3 SPHK1 FST ITGA2 SEMA3A TNC PRKCA CTGF ACE2 TNNT3 PLCE1 MYL9 HBEGF
DLA	Processes	51272	positive regulation of cellular component movement	x	5.8588e-05	0.0027642	14/392 3.5%	103/9774 1.0%	EDN1 SPHK1 ITGA2 SERPINE1 F3 ETS1 AMOT P2RY6 PC BCL6 P2RY2 F2RL1 HBEGF S100A7
DLA	Processes	35966	response to topologically incorrect protein		6.3686e-05	0.0029563	11/392 2.8%	67/9774 0.6%	DNAJB1 HSPA1L HSPA5 DDIT3 DNAJB4 DERL3 HSPA6 CLU HSPA1B HSPA1A NFE2L2
DLA	Processes	48522	positive regulation of cellular process		6.7123e-05	0.0030349	85/392 21.6%	1422/9774 14.5%	FOXA1 EHF ECM1 BTG1 IL20 SERPINE1 FHL2 SIRPB2 AHR CLU ETS1 CTGF AMOT AKAP12 CASP9 BOC TIMP1 SOX9 JARID2 TGM2 VAV3 IL11 CARD10 EDN1 DUSP1 SPHK1 ITGA2 PRKCA NGF F3 PGF PIAS1 CDC25B EREG DDIT3 ITGA5 IRF6 HBEGF S100A7 CREB5 FLG KMT2E DLX2 DLX5 DCUN1D3 AMIGO1 KLK5 TTK P2RY6 P2RY2 S100A12 S1PR3 KCNN4 APOB WNT10B SMAD1 CENPV COL26A1 EGR4 HSPA5 TGFB3 NOS3 IL34 GRHL3 FANCB SORBS1 PBX1 FOSL1 NR4A1 CDK7 PC …
DLA	Processes	14070	response to organic cyclic compound		6.749e-05	0.0030349	28/392 7.1%	316/9774 3.2%	FOXA1 SERPINE1 FHL2 PLAT CTGF SOCS1 P2RY2 SLIT1 DUOX2 DUSP1 TGFB3 NOS3 SPHK1 ITGA2 PRKCA FANCB NGF F3 PIAS1 FOSL1 CDK7 STAG1 LOX KLF9 CYP1A1 MMP19 ACSBG1 FKBP4
DLA	Processes	51240	positive regulation of multicellular organismal process		7.9627e-05	0.0035256	28/392 7.1%	319/9774 3.2%	FLG ECM1 BTG1 IL20 AMIGO1 SERPINE1 CTGF AMOT P2RY2 SMAD1 EDN1 TGFB3 NOS3 SPHK1 FST ITGA2 FOXJ1 PRKCA NGF F3 EREG RHOB TLR1 FAP BAMBI ID2 REL ANGPTL4
DLA	Processes	61041	regulation of wound healing	x	9.0139e-05	0.0039306	7/392 1.7%	28/9774 0.2%	EDN1 PC NOS3 SERPINE1 F2RL1 F3 HBEGF
DLA	Processes	10646	regulation of cell communication		0.00011155	0.0047917	54/392 13.7%	806/9774 8.2%	FOXA1 ECM1 SERPINE1 TNFAIP3 PLAT SH3RF1 AKAP12 SPRED3 RGS2 CYP26B1 CALB1 PLCE1 MCF2L2 ARFGEF3 TGM2 VAV3 IL11 PLEKHG1 EDN1 SPHK1 FST ITGA2 PRKCA FOXL1 NGF F3 EREG ARC RASA2 ITGA5 ARHGEF2 HBEGF S100A7 FLG RGS16 KLK5 TTK APCDD1 KALRN IL1RL1 SOCS1 GNG4 SLIT1 S100A12 PTPN1 HSPA5 TGFB3 BCL6 CILP P2RX2 BAMBI BHLHE40 REL MAP3K14
DLA	Processes	7200	phospholipase C-activating G protein-coupled receptor signaling pathway		0.00013012	0.0054651	6/392 1.5%	21/9774 0.2%	P2RY6 EDN1 GRM5 P2RY2 PLCE1 TGM2
DLA	Processes	23051	regulation of signaling		0.00013103	0.0054651	54/392 13.7%	811/9774 8.2%	FOXA1 ECM1 SERPINE1 TNFAIP3 PLAT SH3RF1 AKAP12 SPRED3 RGS2 CYP26B1 CALB1 PLCE1 MCF2L2 ARFGEF3 TGM2 VAV3 IL11 PLEKHG1 EDN1 SPHK1 FST ITGA2 PRKCA FOXL1 NGF F3 EREG ARC RASA2 ITGA5 ARHGEF2 HBEGF S100A7 FLG RGS16 KLK5 TTK APCDD1 KALRN IL1RL1 SOCS1 GNG4 SLIT1 S100A12 PTPN1 HSPA5 TGFB3 BCL6 CILP P2RX2 BAMBI BHLHE40 REL MAP3K14
DLA	Processes	45595	regulation of cell differentiation		0.00013943	0.0057324	30/392 7.6%	364/9774 3.7%	FLG FOXA1 DLX2 BTG1 IL20 DLX5 SEMA3A AMIGO1 CLU ETS1 BOC SLIT1 SOX9 APOB S1PR5 WNT10B SMAD1 EDN1 TGFB3 FST SPINK5 FOXJ1 NGF PBX1 PIAS1 EREG BCL6 BAMBI ID2 CDK5R1
DLA	Processes	14911	positive regulation of smooth muscle cell migration		0.00015688	0.0062025	4/392 1.0%	8/9774 0.0%	P2RY6 ITGA2 P2RY2 F3
DLA	Processes	50817	coagulation		0.00015948	0.0062025	10/392 2.5%	62/9774 0.6%	IL11 VWF IL10RB IL10RA ITGA2 TFPI2 PLAUR IFNLR1 PLAT F3
DLA	Processes	6986	response to unfolded protein		0.00015948	0.0062025	10/392 2.5%	62/9774 0.6%	DNAJB1 HSPA1L HSPA5 DDIT3 DNAJB4 DERL3 HSPA6 HSPA1B HSPA1A NFE2L2
DLA	Processes	7596	blood coagulation		0.00015948	0.0062025	10/392 2.5%	62/9774 0.6%	IL11 VWF IL10RB IL10RA ITGA2 TFPI2 PLAUR IFNLR1 PLAT F3
DLA	Processes	40012	regulation of locomotion		0.00017791	0.0068271	19/392 4.8%	187/9774 1.9%	EDN1 CXCL8 SPHK1 ITGA2 SEMA3A LAMA4 SERPINE1 PRKCA F3 AMOT P2RY6 PC P2RY2 SLIT1 F2RL1 CCR4 VCL HBEGF S100A7
DLA	Processes	35295	tube development		0.00019032	0.007207	29/392 7.3%	353/9774 3.6%	FLG FOXA1 CXCL8 SH2D2A PLAT CTGF AMOT CALB1 GJA5 APOB TGM2 VAV3 SMAD1 ARG2 EDN1 TGFB3 NOS3 FOXL1 PBX1 PGF EREG PC NR4A3 FAP LOX CYP1A1 MMP19 ITGA5 S100A7
DLA	Processes	60548	negative regulation of cell death		0.00019521	0.0072211	27/392 6.8%	319/9774 3.2%	FLG BCL2A1 SERPINE1 TNFAIP3 CLU NUAK2 BAG3 IER3 TNFSF18 HSPA5 TGFB3 NOS3 SPHK1 NGF F3 DHRS2 NR4A1 ARC COL2A1 PC BCL6 CLCF1 ERCC2 ANGPTL4 SLC25A4 HSPA1B HSPA1A
DLA	Processes	51674	localization of cell		0.00019822	0.0072211	22/392 5.6%	236/9774 2.4%	VAV3 DNAH3 BTG1 CXCL8 NOS3 FOXJ1 PRKCA PLAT ETS1 CTGF AMOT PC FAP BAMBI JMY SLIT1 S100P ITGA5 APOB S100A9 CCR4 CDK5R1
DLA	Processes	48870	cell motility		0.00019822	0.0072211	22/392 5.6%	236/9774 2.4%	VAV3 DNAH3 BTG1 CXCL8 NOS3 FOXJ1 PRKCA PLAT ETS1 CTGF AMOT PC FAP BAMBI JMY SLIT1 S100P ITGA5 APOB S100A9 CCR4 CDK5R1
DLA	Processes	32103	positive regulation of response to external stimulus		0.00023113	0.008315	11/392 2.8%	77/9774 0.7%	CXCL8 ITGA2 SERPINE1 IFNK F2RL1 PRKCA F3 CCR4 S100A7 EREG TGM2
DLA	Processes	6928	movement of cell or subcellular component	x	0.00026037	0.0092512	33/392 8.4%	431/9774 4.4%	DNAH3 BTG1 CXCL8 SEMA3A SEMA3B TUBD1 PLAT LSP1 ETS1 CTGF AMOT SLIT1 APOB CCR4 VAV3 NOS3 ITGA2 PLAUR FOXJ1 KIF24 PRKCA EXT1 PC FAP BAMBI JMY S100P HAP1 ITGA5 KIF20B S100A9 VCL CDK5R1
DLA	Processes	42445	hormone metabolic process		0.00027131	0.0094821	10/392 2.5%	66/9774 0.6%	FOXA1 ACE2 SULT1B1 CYP26B1 CYP1A1 BCO2 NGF CRYM DHRS2 DUOX2
DLA	Processes	1903034	regulation of response to wounding	x	0.00027346	0.0094821	7/392 1.7%	33/9774 0.3%	EDN1 PC NOS3 SERPINE1 F2RL1 F3 HBEGF
DLA	Processes	40011	locomotion		0.00029154	0.0099888	27/392 6.8%	327/9774 3.3%	DNAH3 BTG1 CXCL8 SEMA3A SEMA3B PLAT ETS1 CTGF AMOT SLIT1 APOB CCR4 VAV3 NOS3 PLAUR FOXJ1 PRKCA FOSL1 EXT1 PC FAP BAMBI JMY S100P ITGA5 S100A9 CDK5R1
DLA	Processes	43066	negative regulation of apoptotic process		0.00029537	0.010001	26/392 6.6%	310/9774 3.1%	FLG BCL2A1 SERPINE1 TNFAIP3 CLU NUAK2 BAG3 IER3 TNFSF18 HSPA5 TGFB3 NOS3 SPHK1 NGF F3 DHRS2 NR4A1 ARC COL2A1 PC BCL6 CLCF1 ERCC2 ANGPTL4 HSPA1B HSPA1A
DLA	Processes	43069	negative regulation of programmed cell death		0.00034318	0.011276	26/392 6.6%	313/9774 3.2%	FLG BCL2A1 SERPINE1 TNFAIP3 CLU NUAK2 BAG3 IER3 TNFSF18 HSPA5 TGFB3 NOS3 SPHK1 NGF F3 DHRS2 NR4A1 ARC COL2A1 PC BCL6 CLCF1 ERCC2 ANGPTL4 HSPA1B HSPA1A
DLA	Processes	7599	hemostasis		0.00034815	0.011276	10/392 2.5%	68/9774 0.6%	IL11 VWF IL10RB IL10RA ITGA2 TFPI2 PLAUR IFNLR1 PLAT F3
DLA	Processes	51241	negative regulation of multicellular organismal process		0.00034905	0.011276	20/392 5.1%	213/9774 2.1%	ARG2 DLX2 ECM1 EDN1 NPR1 NOS3 FST SEMA3A SERPINE1 SPINK5 FOXJ1 PRKCA FANCB KLF2 AMOT PC BCL6 P2RY2 SLIT1 SOX9
DLA	Processes	9966	regulation of signal transduction		0.00035289	0.011276	48/392 12.2%	724/9774 7.4%	FLG FOXA1 ECM1 RGS16 SERPINE1 KLK5 TNFAIP3 TTK APCDD1 KALRN SH3RF1 AKAP12 SPRED3 IL1RL1 RGS2 CYP26B1 SOCS1 GNG4 SLIT1 PLCE1 S100A12 MCF2L2 ARFGEF3 TGM2 VAV3 PTPN1 IL11 PLEKHG1 EDN1 HSPA5 TGFB3 SPHK1 FST PRKCA FOXL1 F3 EREG BCL6 CILP P2RX2 BAMBI RASA2 REL ITGA5 ARHGEF2 MAP3K14 HBEGF S100A7
DLA	Processes	2000147	positive regulation of cell motility		0.00035655	0.011276	12/392 3.0%	94/9774 0.9%	P2RY6 EDN1 PC SPHK1 ITGA2 P2RY2 SERPINE1 F2RL1 F3 HBEGF S100A7 AMOT
DLA	Processes	30335	positive regulation of cell migration		0.00035655	0.011276	12/392 3.0%	94/9774 0.9%	P2RY6 EDN1 PC SPHK1 ITGA2 P2RY2 SERPINE1 F2RL1 F3 HBEGF S100A7 AMOT
DLA	Processes	30193	regulation of blood coagulation		0.00037058	0.011468	6/392 1.5%	25/9774 0.2%	EDN1 PC NOS3 SERPINE1 F2RL1 F3
DLA	Processes	1900046	regulation of hemostasis		0.00037058	0.011468	6/392 1.5%	25/9774 0.2%	EDN1 PC NOS3 SERPINE1 F2RL1 F3
DLA	Processes	61448	connective tissue development		0.0003989	0.012213	9/392 2.2%	57/9774 0.5%	FLG FOXA1 WNT10B DLX2 EDN1 COL2A1 PRKCA SOX9 CTGF
DLA	Processes	14910	regulation of smooth muscle cell migration		0.00041965	0.012713	5/392 1.2%	17/9774 0.1%	P2RY6 ITGA2 P2RY2 SERPINE1 F3
DLA	Processes	30101	natural killer cell activation		0.00044139	0.01309	4/392 1.0%	10/9774 0.1%	IFNK SLAMF7 ULBP2 ULBP1
DLA	Processes	34405	response to fluid shear stress		0.00044139	0.01309	4/392 1.0%	10/9774 0.1%	TGFB3 NOS3 F3 KLF2
DLA	Processes	51270	regulation of cellular component movement	x	0.00044574	0.01309	18/392 4.5%	185/9774 1.8%	EDN1 SPHK1 ITGA2 SEMA3A LAMA4 SERPINE1 TNC F3 ETS1 AMOT P2RY6 PC BCL6 P2RY2 F2RL1 VCL HBEGF S100A7
DLA	Processes	9653	anatomical structure morphogenesis		0.00045542	0.013239	52/392 13.2%	812/9774 8.3%	FOXA1 CLIC5 CXCL8 TNC PLAT CLU CTGF AMOT CYP26B1 ADAMTS1 GJA5 SOX9 IER3 TGM2 VAV3 EDN1 FST ITGA2 PRKCA FOXL1 PGF EREG COL2A1 MMP19 ITGA5 ARHGEF2 VCL S100A7 FLG DLX2 DLX5 SEMA3A TSHZ1 SH2D2A SEMA3B KALRN SLIT1 S1PR3 APOB SMAD1 HSPA5 FEM1B TGFB3 TBX4 PBX1 EXT1 PC NR4A3 BCL6 FAP ERCC2 CDK5R1
DLA	Processes	3008	system process		0.0005025	0.014318	36/392 9.1%	503/9774 5.1%	CLIC5 NPR1 RGS16 TNC TACSTD2 LMOD1 BEST2 ACTG2 AMOT CALB1 GJA5 P2RY2 KCNN4 CRYM TPRN EDN1 GUCY1A1 NOS3 ITGA2 PRKCA SORBS1 NGF MERTK EML2 FOSL1 ACE2 RCAN1 CLCN5 COL2A1 NR4A3 FAP TNNT3 OR2A7 ITGA5 MYL9 VCL
DLA	Processes	45937	positive regulation of phosphate metabolic process		0.00050745	0.014318	18/392 4.5%	187/9774 1.9%	VAV3 IL11 CARD10 EDN1 IL20 DUSP1 TGFB3 NOS3 SPHK1 ITGA2 IL34 PRKCA TTK CTGF EREG FAP CLCF1 ITGA5
DLA	Processes	10562	positive regulation of phosphorus metabolic process		0.00050745	0.014318	18/392 4.5%	187/9774 1.9%	VAV3 IL11 CARD10 EDN1 IL20 DUSP1 TGFB3 NOS3 SPHK1 ITGA2 IL34 PRKCA TTK CTGF EREG FAP CLCF1 ITGA5
DLA	Processes	9605	response to external stimulus		0.00051423	0.014323	41/392 10.4%	599/9774 6.1%	CXCL8 NCF2 SEMA3A SERPINE1 SEMA3B CLU AMOT IFIH1 IL1RL1 SOCS1 NUAK2 SLIT1 S100A12 SLAMF7 FCGR1A APOB CCR4 DUOX2 RSAD2 HSPA5 NOS3 SPHK1 IL10RA ITGA2 PLAUR PRKCA FANCB NGF F3 FOSL1 EXT1 TLR1 NR4A3 DDIT3 BHLHE40 CYP1A1 LCN2 IFNK S100A9 S100A7 CDK5R1
DLA	Processes	23052	signaling		0.00051759	0.014323	112/392 28.5%	2108/9774 21.5%	FOXA1 TNC PLAT BACH1 CLU CTGF RAB43 GJA5 PLCE1 TGM2 PPP1R16B CARD10 GUCY1A1 FST PRKCA ANK3 PGF PIAS1 EREG RAB37 DDIT3 FKBP4 S100A9 FLG KMT2E RRAD NPR1 SH2D2A TACSTD2 CSF2RB KALRN SOCS1 STK38L TNFSF18 WNT10B SMAD1 HSPA5 KLRC2 TGFB3 PDE2A FANCB CORO2A EXT1 RCAN1 NR4A1 CDK7 STAG1 PTPRA ARTN NFE2L2 GPSM2 CXCL8 DOC2A FHL2 SIRPB2 RND3 RND1 AKAP12 GRM5 ADAMTS1 TAGAP DUSP4 VAV3 IL11 EDN1 SPHK1 ITGA2 PLAU…
DLA	Processes	1568	blood vessel development		0.00053979	0.014795	19/392 4.8%	204/9774 2.0%	FLG VAV3 EDN1 CXCL8 SPHK1 SH2D2A LAMA4 PLAT PGF CTGF EREG AMOT FAP LOX GJA5 MMP19 ITGA5 APOB S100A7
DLA	Processes	51726	regulation of cell cycle		0.00056107	0.015234	31/392 7.9%	413/9774 4.2%	KMT2E FOXA1 CDKN1B CXCL8 HPGD TTK BACH1 ETS1 CTGF SESN3 SESN1 CENPV EDN1 GADD45A SPHK1 GPR3 FANCB NGF EREG RHOB TICRR FOSL1 ERN2 CDK7 DDIT3 ID2 JMY ERCC2 IRF6 KIF20B CDK5R1
DLA	Processes	46461	neutral lipid catabolic process		0.00060275	0.015915	3/392 0.7%	5/9774 0.0%	LIPH PNPLA3 APOB
DLA	Processes	46464	acylglycerol catabolic process		0.00060275	0.015915	3/392 0.7%	5/9774 0.0%	LIPH PNPLA3 APOB
DLA	Processes	19433	triglyceride catabolic process		0.00060275	0.015915	3/392 0.7%	5/9774 0.0%	LIPH PNPLA3 APOB
DLA	Processes	30308	negative regulation of cell growth		0.00061285	0.016034	11/392 2.8%	86/9774 0.8%	CDKN1B BTG1 BCL6 RRAD NPR1 GNG4 SEMA3A DCUN1D3 SLIT1 HSPA1B HSPA1A
DLA	Processes	1901700	response to oxygen-containing compound		0.00063391	0.016436	33/392 8.4%	453/9774 4.6%	KMT2E FOXA1 BTG1 SERPINE1 PLAT CTGF SOCS1 SLIT1 APOB DUOX2 WNT10B DUSP1 TGFB3 NOS3 SPHK1 IL10RA ITGA2 PRKCA FANCB SORBS1 NGF F3 KLF2 EREG FOSL1 FABP3 NR4A3 PTPRA DDIT3 CYP1A1 MMP19 S100A7 CDK5R1
DLA	Processes	1901698	response to nitrogen compound		0.00065666	0.016874	25/392 6.3%	309/9774 3.1%	BTG1 DERL3 PLAT CTGF SOCS1 P2RY2 DUOX2 SMAD1 HSPA5 DUSP1 NOS3 SPHK1 ITGA2 PRKCA SORBS1 NGF F3 EREG FOSL1 FABP3 NR4A3 PTPRA DDIT3 MMP19 CDK5R1
DLA	Processes	50818	regulation of coagulation		0.00071193	0.018132	6/392 1.5%	28/9774 0.2%	EDN1 PC NOS3 SERPINE1 F2RL1 F3
DLA	Processes	8284	positive regulation of cell population proliferation		0.00073224	0.018486	26/392 6.6%	329/9774 3.3%	FLG ECM1 DLX5 SIRPB2 TTK CLU CTGF S1PR3 TIMP1 TGM2 IL11 EDN1 EGR4 SPHK1 ITGA2 IL34 PRKCA NGF F3 PBX1 PGF CDC25B EREG FOSL1 BCL6 ID2
DLA	Processes	48732	gland development		0.00073886	0.018491	18/392 4.5%	193/9774 1.9%	FLG FOXA1 VWF FEM1B TGFB3 ITGA2 SEMA3A TNC AHR FANCB PBX1 ID2 CYP1A1 SOX9 IRF6 JARID2 FKBP4 TGM2
DLA	Processes	1901654	response to ketone		0.00076227	0.018795	8/392 2.0%	50/9774 0.5%	FOSL1 SOCS1 DUSP1 TGFB3 SPHK1 SLIT1 PRKCA FANCB
DLA	Processes	44703	multi-organism reproductive process		0.00076468	0.018795	29/392 7.3%	384/9774 3.9%	CLIC5 BTG1 HPGD TUBD1 RGS2 CYP26B1 ADAMTS1 CCIN SOX9 APOB SMAD1 TGFB3 NOS3 SPHK1 FST FOXJ1 FANCB OVOL1 PGF PIAS1 EREG FOSL1 BCL6 PSG5 KLF9 CYP1A1 MMP19 GOPC FKBP4
DLA	Processes	1944	vasculature development		0.00077061	0.018795	19/392 4.8%	210/9774 2.1%	FLG VAV3 EDN1 CXCL8 SPHK1 SH2D2A LAMA4 PLAT PGF CTGF EREG AMOT FAP LOX GJA5 MMP19 ITGA5 APOB S100A7
DLA	Processes	42471	ear morphogenesis		0.00080017	0.019352	7/392 1.7%	39/9774 0.3%	FLG CLIC5 EDN1 COL2A1 NR4A3 DLX5 TSHZ1
DLA	Processes	10243	response to organonitrogen compound		0.0008526	0.020448	24/392 6.1%	297/9774 3.0%	SMAD1 BTG1 HSPA5 DUSP1 NOS3 SPHK1 ITGA2 DERL3 PRKCA PLAT SORBS1 NGF F3 CTGF EREG FOSL1 FABP3 SOCS1 NR4A3 PTPRA DDIT3 P2RY2 MMP19 DUOX2
DLA	Processes	7154	cell communication		0.00093047	0.022129	114/392 29.0%	2186/9774 22.3%	FOXA1 TNC PLAT BACH1 CLU CTGF RAB43 GJA5 PLCE1 TGM2 PPP1R16B CARD10 GUCY1A1 FST PRKCA ANK3 PGF PIAS1 EREG RAB37 DDIT3 FKBP4 S100A9 FLG KMT2E RRAD NPR1 SH2D2A TACSTD2 CSF2RB KALRN SOCS1 NUAK2 STK38L TNFSF18 WNT10B SMAD1 HSPA5 KLRC2 TGFB3 PDE2A FANCB CORO2A FOSL1 EXT1 RCAN1 NR4A1 CDK7 STAG1 PTPRA ARTN NFE2L2 GPSM2 CXCL8 DOC2A FHL2 SIRPB2 RND3 RND1 AKAP12 GRM5 ADAMTS1 TAGAP DUSP4 VAV3 IL11 EDN1 SPHK…
DLA	Processes	51704	multi-organism process		0.00093805	0.022129	29/392 7.3%	389/9774 3.9%	CLIC5 BTG1 HPGD TUBD1 RGS2 CYP26B1 ADAMTS1 CCIN SOX9 APOB SMAD1 TGFB3 NOS3 SPHK1 FST FOXJ1 FANCB OVOL1 PGF PIAS1 EREG FOSL1 BCL6 PSG5 KLF9 CYP1A1 MMP19 GOPC FKBP4
DLA	Processes	7186	G protein-coupled receptor signaling pathway		0.0010116	0.02367	17/392 4.3%	182/9774 1.8%	PTGER4 GPSM2 EDN1 CXCL8 SPHK1 GPR3 SORCS2 EREG AKAP12 P2RY6 GRM5 P2RY2 PLCE1 F2RL1 S1PR3 CDK5R1 TGM2
DLA	Processes	30850	prostate gland development		0.0010485	0.024168	6/392 1.5%	30/9774 0.3%	FOXA1 FEM1B TNC AHR SOX9 FKBP4
DLA	Processes	2376	immune system process		0.0010497	0.024168	41/392 10.4%	621/9774 6.3%	KMT2E PTGER4 SEMA7A CXCL8 NCF2 SERPINE1 IFI30 CLU ETS1 IFIH1 IL1RL1 S100A12 SLAMF7 TIMP1 JARID2 FCGR1A CCR4 TNFSF18 WNT10B IL11 EDN1 RSAD2 IL10RB FST FOXJ1 PRKCA FANCB DHRS2 PBX1 TLR1 PC BCL6 CLCF1 ID2 ERCC2 LCN2 IFNK ULBP2 S100A9 ULBP1 S100A7
DLA	Processes	9607	response to biotic stimulus		0.0010863	0.024718	25/392 6.3%	320/9774 3.2%	NCF2 SERPINE1 CLU IFIH1 IL1RL1 SOCS1 S100A12 SLAMF7 FCGR1A APOB CCR4 DUOX2 RSAD2 HSPA5 NOS3 IL10RA NGF F3 FOSL1 TLR1 DDIT3 CYP1A1 LCN2 IFNK S100A7
DLA	Processes	1655	urogenital system development		0.0010908	0.024718	14/392 3.5%	136/9774 1.3%	FLG FOXA1 SMAD1 ARG2 FEM1B TNC AHR PBX1 PGF CALB1 ADAMTS1 PLCE1 SOX9 FKBP4
DLA	Processes	51216	cartilage development		0.0011333	0.025481	8/392 2.0%	53/9774 0.5%	FLG WNT10B DLX2 EDN1 COL2A1 PRKCA SOX9 CTGF
DLA	Processes	46503	glycerolipid catabolic process		0.0011697	0.025697	3/392 0.7%	6/9774 0.0%	LIPH PNPLA3 APOB
DLA	Processes	7413	axonal fasciculation		0.0011697	0.025697	3/392 0.7%	6/9774 0.0%	SEMA3A AMIGO1 CDK5R1
DLA	Processes	106030	neuron projection fasciculation		0.0011697	0.025697	3/392 0.7%	6/9774 0.0%	SEMA3A AMIGO1 CDK5R1
DLA	Processes	30278	regulation of ossification		0.0012657	0.027595	7/392 1.7%	42/9774 0.4%	PTGER4 ECM1 RSAD2 TGFB3 P2RY2 SOX9 PBX1
DLA	Processes	32879	regulation of localization		0.0013233	0.028636	33/392 8.4%	473/9774 4.8%	DOC2A SEMA3A LAMA4 SERPINE1 TNC STON2 ETS1 AMOT P2RY6 P2RY2 KCNN4 APOB IL11 SLC15A1 EDN1 TGFB3 NOS3 SPHK1 FST ITGA2 PRKCA SORBS1 NGF F3 YRDC PC BCL6 P2RX2 F2RL1 GOPC VCL HBEGF S100A7
DLA	Processes	31344	regulation of cell projection organization		0.0013639	0.029293	12/392 3.0%	109/9774 1.1%	SMAD1 PC TGFB3 SPHK1 ITGA2 SEMA3A P2RY2 AMIGO1 SLIT1 FKBP4 NGF KALRN
DLA	Processes	7165	signal transduction		0.0014086	0.029825	104/392 26.5%	1983/9774 20.2%	TNC PLAT BACH1 CLU CTGF RAB43 PLCE1 TGM2 PPP1R16B CARD10 GUCY1A1 FST PRKCA ANK3 PGF PIAS1 EREG RAB37 DDIT3 FKBP4 FLG KMT2E RRAD NPR1 SH2D2A TACSTD2 CSF2RB KALRN SOCS1 STK38L TNFSF18 WNT10B SMAD1 HSPA5 KLRC2 TGFB3 PDE2A FANCB CORO2A EXT1 RCAN1 NR4A1 CDK7 STAG1 PTPRA ARTN NFE2L2 GPSM2 CXCL8 FHL2 SIRPB2 RND3 RND1 AKAP12 GRM5 ADAMTS1 TAGAP DUSP4 VAV3 EDN1 SPHK1 ITGA2 PLAUR RHOF NGF F3 SORCS2 RAB33A R…
DLA	Processes	51716	cellular response to stimulus		0.0014094	0.029825	122/392 31.1%	2394/9774 24.4%	SERPINE1 TNC PLAT BACH1 CLU CTGF RAB43 SESN1 PLCE1 TGM2 PPP1R16B CARD10 GUCY1A1 FST PRKCA ANK3 PGF PIAS1 EREG RAB37 DDIT3 FKBP4 S100A9 FLG KMT2E RRAD NPR1 SH2D2A TACSTD2 CSF2RB KALRN SOCS1 NUAK2 S100A12 STK38L TNFSF18 WNT10B SMAD1 FANCM HSPA5 KLRC2 GADD45A TGFB3 PDE2A FANCB CORO2A FOSL1 EXT1 SULT1B1 RCAN1 NR4A1 CDK7 STAG1 BCL6 PTPRA ARTN ID2 JMY CYP1A1 NFE2L2 GPSM2 CXCL8 FHL2 SIRPB2 RND3 RND1 AKA…
DLA	Processes	6952	defense response		0.0015237	0.032008	26/392 6.6%	346/9774 3.5%	CXCL8 NCF2 SERPINE1 LSP1 CLU IFIH1 IL1RL1 S100A12 SLAMF7 S1PR3 FCGR1A KCNN4 CCR4 SMAD1 RSAD2 KLRC2 IL10RB SPHK1 NGF F3 FOSL1 TLR1 LCN2 IFNK S100A9 S100A7
DLA	Processes	60743	epithelial cell maturation involved in prostate gland development		0.0016046	0.033464	2/392 0.5%	2/9774 0.0%	FOXA1 FEM1B
DLA	Processes	22414	reproductive process		0.0016228	0.0336	38/392 9.6%	576/9774 5.8%	FOXA1 CLIC5 BTG1 HPGD TNC TUBD1 AHR RGS2 CYP26B1 ADAMTS1 SLIT1 PLAC1 CCIN SOX9 APOB SMAD1 VWF FEM1B TGFB3 NOS3 SPHK1 FST FOXJ1 FANCB OVOL1 PBX1 PGF PIAS1 EREG FOSL1 BCL6 PSG5 KLF9 CYP1A1 MMP19 ACSBG1 GOPC FKBP4
DLA	Processes	1558	regulation of cell growth		0.001662	0.034166	16/392 4.0%	174/9774 1.7%	CDKN1B BTG1 RRAD NPR1 SPHK1 SEMA3A DCUN1D3 NGF CTGF BCL6 GNG4 SLIT1 PLCE1 HSPA1B HBEGF HSPA1A
DLA	Processes	3	reproduction		0.0016739	0.034167	38/392 9.6%	577/9774 5.9%	FOXA1 CLIC5 BTG1 HPGD TNC TUBD1 AHR RGS2 CYP26B1 ADAMTS1 SLIT1 PLAC1 CCIN SOX9 APOB SMAD1 VWF FEM1B TGFB3 NOS3 SPHK1 FST FOXJ1 FANCB OVOL1 PBX1 PGF PIAS1 EREG FOSL1 BCL6 PSG5 KLF9 CYP1A1 MMP19 ACSBG1 GOPC FKBP4
DLA	Processes	302	response to reactive oxygen species		0.0018232	0.036248	9/392 2.2%	70/9774 0.7%	FOSL1 DUSP1 DDIT3 SPHK1 SERPINE1 PRKCA F3 KLF2 S100A7
DLA	Processes	45787	positive regulation of cell cycle		0.0018232	0.036248	9/392 2.2%	70/9774 0.7%	FOSL1 FOXA1 CENPV EDN1 SPHK1 ID2 FANCB CTGF EREG
DLA	Processes	16525	negative regulation of angiogenesis		0.0018514	0.036248	4/392 1.0%	14/9774 0.1%	NPR1 SERPINE1 SPINK5 AMOT
DLA	Processes	1901343	negative regulation of vasculature development		0.0018514	0.036248	4/392 1.0%	14/9774 0.1%	NPR1 SERPINE1 SPINK5 AMOT
DLA	Processes	2000181	negative regulation of blood vessel morphogenesis		0.0018514	0.036248	4/392 1.0%	14/9774 0.1%	NPR1 SERPINE1 SPINK5 AMOT
DLA	Processes	30728	ovulation		0.0018514	0.036248	4/392 1.0%	14/9774 0.1%	ADAMTS1 NOS3 MMP19 EREG
DLA	Processes	32355	response to estradiol		0.0019202	0.03734	7/392 1.7%	45/9774 0.4%	FOXA1 SOCS1 DUSP1 NOS3 PRKCA F3 CTGF
DLA	Processes	42327	positive regulation of phosphorylation		0.0021014	0.04059	16/392 4.0%	178/9774 1.8%	VAV3 IL11 CARD10 EDN1 IL20 DUSP1 TGFB3 SPHK1 IL34 PRKCA TTK CTGF EREG FAP CLCF1 ITGA5
DLA	Processes	72359	circulatory system development		0.002136	0.040851	25/392 6.3%	336/9774 3.4%	FLG CXCL8 SH2D2A LAMA4 TNC PLAT CTGF AMOT ADAMTS1 GJA5 PLCE1 SOX9 APOB VAV3 EDN1 SPHK1 PGF EREG COL2A1 FAP LOX ID2 MMP19 ITGA5 S100A7
DLA	Processes	51130	positive regulation of cellular component organization	x	0.0021461	0.040851	15/392 3.8%	162/9774 1.6%	SMAD1 EDN1 TGFB3 SPHK1 ITGA2 AMIGO1 SERPINE1 PRKCA AHR NGF EREG AMOT P2RY2 JMY JARID2
DLA	Processes	43207	response to external biotic stimulus		0.0021717	0.040851	23/392 5.8%	300/9774 3.0%	RSAD2 NCF2 NOS3 IL10RA SERPINE1 NGF F3 CLU FOSL1 IFIH1 TLR1 IL1RL1 SOCS1 CYP1A1 LCN2 IFNK S100A12 SLAMF7 FCGR1A APOB CCR4 DUOX2 S100A7
DLA	Processes	51707	response to other organism		0.0021717	0.040851	23/392 5.8%	300/9774 3.0%	RSAD2 NCF2 NOS3 IL10RA SERPINE1 NGF F3 CLU FOSL1 IFIH1 TLR1 IL1RL1 SOCS1 CYP1A1 LCN2 IFNK S100A12 SLAMF7 FCGR1A APOB CCR4 DUOX2 S100A7
DLA	Processes	31960	response to corticosteroid		0.0022242	0.041567	9/392 2.2%	72/9774 0.7%	FOSL1 DUSP1 SERPINE1 SLIT1 PRKCA ACSBG1 PLAT NGF CTGF
DLA	Processes	22610	biological adhesion	x	0.0022521	0.041817	29/392 7.3%	412/9774 4.2%	FBLN7 TNXB FBLIM1 AMIGO1 TNC SIRPB2 SDSL CLDN1 RND3 CTGF BOC SLAMF7 NR2C2AP LMLN VWF LAMB3 ITGA2 PCDH7 SORBS1 F3 RHOB ACE2 CLDN4 CLDN7 ITGA5 CDH16 FERMT2 VCL CDK5R1
DLA	Processes	48661	positive regulation of smooth muscle cell proliferation		0.0022865	0.042173	5/392 1.2%	24/9774 0.2%	EDN1 ITGA2 PRKCA EREG TGM2
DLA	Processes	8585	female gonad development		0.0023006	0.042173	8/392 2.0%	59/9774 0.6%	ADAMTS1 NOS3 FST SLIT1 MMP19 ACSBG1 FANCB EREG
DLA	Processes	48468	cell development		0.0023343	0.042519	29/392 7.3%	413/9774 4.2%	FLG FOXA1 CLIC5 DLX5 SEMA3A AMIGO1 SEMA3B CLU KALRN RND1 MAP2 SLIT1 TIMP1 SOX9 EDN1 FEM1B NOS3 PRKCA FANCB NGF POU3F1 EREG EXT1 RCAN1 BCL6 ERCC2 GOPC IRF6 CDK5R1
DLA	Processes	71695	anatomical structure maturation		0.0024494	0.044336	9/392 2.2%	73/9774 0.7%	FLG FOXA1 FEM1B SPINK5 ERCC2 TIMP1 FANCB EREG RND1
DLA	Processes	16477	cell migration		0.0025136	0.045047	18/392 4.5%	215/9774 2.1%	VAV3 BTG1 CXCL8 NOS3 FOXJ1 PRKCA PLAT CTGF AMOT PC FAP BAMBI SLIT1 S100P ITGA5 S100A9 CCR4 CDK5R1
DLA	Processes	80134	regulation of response to stress		0.00252	0.045047	17/392 4.3%	198/9774 2.0%	EDN1 IL20 NOS3 ITGA2 SERPINE1 PRKCA IFNLR1 F3 SH3RF1 EREG ACE2 PC BCL6 IFNK F2RL1 HBEGF TGM2
DLA	Processes	48469	cell maturation		0.0025638	0.04532	8/392 2.0%	60/9774 0.6%	FLG FOXA1 FEM1B ERCC2 TIMP1 FANCB EREG RND1
DLA	Processes	30334	regulation of cell migration		0.0025668	0.04532	15/392 3.8%	165/9774 1.6%	EDN1 SPHK1 ITGA2 SEMA3A LAMA4 SERPINE1 F3 AMOT P2RY6 PC P2RY2 F2RL1 VCL HBEGF S100A7
DLA	Processes	3006	developmental process involved in reproduction		0.0026883	0.047177	28/392 7.1%	398/9774 4.0%	FOXA1 BTG1 TNC TUBD1 AHR RGS2 CYP26B1 ADAMTS1 SLIT1 PLAC1 CCIN SOX9 APOB VWF FEM1B NOS3 FST FOXJ1 FANCB OVOL1 PBX1 PIAS1 EREG BCL6 MMP19 ACSBG1 GOPC FKBP4
DLA	Processes	22602	ovulation cycle process		0.0027655	0.048237	5/392 1.2%	25/9774 0.2%	ADAMTS1 NOS3 SLIT1 MMP19 EREG
* Barrier related pathways were identified by searching the gene ontology list for key terms: 'adhesion', 'junction', 'barrier', 'skin', 'epidermis', 'epidermal', 'epithelium', 'epithelial', 'plasma membrane', 'cellular component', 'wounding'.

## Sheet: Supplementary Table 5
Supplementary Table 5: Tight junction genes differentially expressed by L-LA, D-LA and HCL treatment of Ect cells*
* As compared to untreated cells. Tables shows Log2Fold change (Log2FC) and false discovery rate (FDR).
	LLA		DLA		HCl
	Log2FC	FDR	Log2FC	FDR	Log2FC	FDR
ACTN1	0.296626	0.179063	0.101154	0.650347	-0.0117715	0.999555
ACTN4	0.165984	0.364415	0.0322866	0.869765	-0.0159094	0.999555
AFDN	0.136428	0.593522	-0.0283932	0.911937	0.0160067	0.999555
AMOTL1	-0.267721	0.10176	-0.301883	0.0427684	-0.0783466	0.999555
ARHGEF2	0.828293	8.00727e-06	0.599522	0.000556965	0.130863	0.999555
ASH1L	-0.23667	0.356246	-0.387117	0.0641497	-0.166742	0.999555
CASK	0.000531911	0.998528	-0.0666999	0.541745	-0.0894198	0.999555
CD99	-0.0296515	0.94176	-0.0280931	0.924576	-0.120226	0.999555
CDC42	0.0552268	0.639884	-0.0380532	0.703158	-0.0134002	0.999555
CDK4	0.0293449	0.916089	0.212243	0.172126	0.101947	0.999555
CGN	0.0496828	0.936867	0.171109	0.651021	0.0366272	0.999555
CLDN1	1.12134	0.000161286	1.167	0.000122099	0.206878	0.999555
CLDN11	-0.0666995	0.910496	0.133712	0.71466	0.0205285	0.999555
CLDN12	-0.156801	0.390189	-0.199595	0.170651	0.00360399	0.999555
CLDN15	0.0599736	0.906817	-0.0182686	0.96284	-0.0894417	0.999555
CLDN16	0.651239	0.0920587	0.641583	0.0640438	0.180807	0.999555
CLDN17	-1.18521	0.63172	-1.71146	0.37754	-0.462979	0.999555
CLDN2	-0.0954354	0.936412	-0.912038	0.185426	-0.452027	0.999555
CLDN3	-0.30026	0.581619	0.0829101	0.862415	0.0978764	0.999555
CLDN4	1.46951	3.88897e-07	1.63053	1.19106e-07	0.598315	0.828355
CLDN7	0.191464	0.587577	0.527104	0.0433901	0.283313	0.999555
CLDN8	-1.67071	0.141987	-1.45903	0.132192	-0.759288	0.999555
CLDN9	-0.764252	0.119511	-0.56456	0.179476	-0.0543696	0.999555
CRB3	0.0567542	0.896024	0.346775	0.136669	0.0277813	0.999555
CSNK2A1	-0.0960254	0.736982	-0.305629	0.10456	-0.119647	0.999555
CSNK2A2	0.0636175	0.584668	0.0330323	0.750921	-0.107289	0.999555
CSNK2B	0.0465132	0.762677	0.0469255	0.690861	-0.0564469	0.999555
CTNNA1	0.0327604	0.919154	-0.106964	0.594069	0.0876475	0.999555
CTNNB1	0.268428	0.145772	0.236822	0.152303	0.122719	0.999555
CTTN	0.182871	0.0804919	0.0443587	0.69907	0.0557051	0.999555
EPB41	-0.312255	0.00638243	-0.146283	0.180278	-0.000299849	0.999555
F11R	0.243467	0.0420244	0.223819	0.04795	0.0550234	0.999555
GNAI1	-0.0761073	0.734697	-0.175001	0.244574	-0.0176949	0.999555
HCLS1	-0.454077	0.640783	-0.0578387	0.949553	0.152199	0.999555
ICAM1	0.0757088	0.917296	0.371264	0.375939	-0.03491	0.999555
ILK	0.112085	0.202113	0.0137453	0.891256	0.0313187	0.999555
JAM3	-0.380322	0.55432	-0.318782	0.530426	-0.306887	0.999555
LLGL1	0.0934555	0.560596	0.136363	0.260144	0.128908	0.999555
LLGL2	-0.124829	0.568695	-0.0703687	0.711252	0.178622	0.999555
MAGI1	-0.0806611	0.74521	0.00774902	0.973647	-0.120403	0.999555
MAGI2	0.207568	0.74372	0.176145	0.721247	-0.224623	0.999555
MAP3K20	0.305143	0.145772	0.213035	0.264286	0.0841998	0.999555
MARK2	0.238492	0.0715226	0.102488	0.437248	0.0130939	0.999555
MPDZ	0.00242118	0.995536	0.0581506	0.823776	-0.0342937	0.999555
MPP5	-0.130918	0.619073	-0.00408271	0.988432	0.0404063	0.999555
MPP6	0.0433193	0.913567	-0.146415	0.543644	0.0187404	0.999555
OCLN	0.491423	0.0441464	0.545097	0.0179183	0.172938	0.999555
PARD3	-0.124153	0.705286	0.0182449	0.953287	-0.109378	0.999555
PARD6A	-0.382104	0.503361	0.529597	0.153139	0.202038	0.999555
PARD6B	0.223641	0.499467	0.42255	0.0786112	0.165989	0.999555
PATJ	-0.160198	0.643341	-0.138312	0.620398	-0.0181951	0.999555
PECAM1	1.77224	0.0683051	1.59709	0.0746236	0.224888	0.999555
PRKCI	-0.00696795	0.966628	-0.024735	0.812598	-0.0104509	0.999555
PRKCZ	0.278211	0.0543512	0.11578	0.421609	0.061587	0.999555
PTEN	-0.322709	7.07643e-05	-0.273648	0.000471308	-0.0929658	0.999555
RAC1	-0.0291496	0.889801	-0.177694	0.140371	-0.046593	0.999555
RHOA	0.0359078	0.750692	0.0743026	0.341893	0.026735	0.999555
SMURF1	0.359764	0.0677619	0.335187	0.0668083	0.130865	0.999555
SPTAN1	0.0345546	0.934474	0.10452	0.693248	0.029043	0.999555
SYMPK	0.121289	0.357744	0.0667828	0.578929	0.00311692	0.999555
TIAM1	0.166039	0.601912	0.0162607	0.960542	-0.00113001	0.999555
TJAP1	0.00233468	0.995085	-0.141039	0.459371	-0.0910645	0.999555
TJP1	0.0113451	0.975223	-0.0412098	0.862404	-0.016362	0.999555
TJP2	0.410088	0.0844687	0.375233	0.0869595	0.104998	0.999555
TJP3	-0.230496	0.735555	0.442681	0.287737	0.323517	0.999555
VAPA	-0.0774917	0.618983	-0.0579959	0.655392	0.015608	0.999555
YBX3	0.1256	0.222872	0.0103444	0.933011	-0.00931255	0.999555

## Sheet: Supplementary Table 6
Supplementary Table 6: Tight junction genes differentially expressed by treatment of VK2 cells with bacterial culture supernatants*
* As compared to cells cultured in media alone from n=3 replicates. Tables shows Log2Fold change (Log2FC) and false discovery rate (FDR).
	L. crispatus		L. jensenii		L. iners		G. vaginalis
	Log2FC	FDR	Log2FC	FDR	Log2FC	FDR	Log2FC	FDR
ACTN1	0.316431	0.0279988	-0.164627	0.236131	-0.0342673	0.885147	-0.0141501	0.970428
ACTN4	0.217938	0.131199	-0.0297983	0.845966	-0.271645	0.119439	-0.241215	0.27022
AMOTL1	0.523862	0.00637269	1.22339	1.54829e-07	0.554147	0.00965342	0.0587972	0.890598
ARHGEF2	3.30615	1.07329e-14	1.43619	5.55453e-08	0.419409	0.0898583	0.180315	0.619421
ASH1L	0.464438	0.0377226	0.2369	0.258002	-0.0162744	0.966112	-0.0270024	0.96159
CASK	0.342654	0.0465061	0.497904	0.00277977	-0.284625	0.191213	-0.230035	0.396244
CDC42	-0.0338473	0.843819	0.0747885	0.63251	-0.0731654	0.751575	-0.104786	0.7299
CDK4	-1.24113	5.52087e-07	-1.09752	7.45275e-07	-0.755964	0.000381179	-0.266091	0.260629
CGN	-0.146113	0.647147	0.484102	0.0699325	-0.0493185	0.921653	0.115443	0.847223
CLDN1	0.0580314	0.916003	0.528884	0.243347	0.202268	0.767223	0.306087	0.713886
CLDN12	0.759895	0.00114142	1.03657	1.34124e-05	0.734328	0.00349292	0.213531	0.563054
CLDN15	0.294924	0.592582	1.53826	0.000512915	0.0848957	0.920688	0.12463	0.905443
CLDN4	1.86638	4.65525e-09	2.15397	2.16537e-10	0.802867	0.0026567	0.0045611	0.993515
CLDN7	0.987669	5.01103e-05	0.83339	0.000150275	1.00145	0.000116911	0.59242	0.0261924
CRB3	1.71001	0.000158326	1.72016	7.43468e-05	1.22346	0.0100965	0.701676	0.251419
CSNK2A1	1.07914	7.9927e-06	0.630751	0.00143509	-0.0171861	0.961649	-0.200456	0.56807
CSNK2A2	0.847607	0.000624742	0.747814	0.00104106	0.14062	0.675467	-0.085932	0.865862
CSNK2B	-0.209079	0.197644	-0.101323	0.507506	-0.288267	0.127953	-0.141724	0.592392
CTNNA1	0.879835	1.54085e-07	0.477149	0.000283338	0.21235	0.159157	0.00666636	0.985863
CTNNB1	-0.147171	0.322229	-0.0470877	0.753176	-0.0507329	0.820117	0.002565	0.994927
CTTN	-0.797759	2.81481e-06	-0.399519	0.00177568	-0.106754	0.517027	-0.028114	0.924325
EPB41	1.50872	3.27575e-08	1.112	1.81664e-06	0.347957	0.156335	0.176079	0.613174
F11R	1.10965	1.28964e-09	1.25192	1.26667e-10	0.00421609	0.983193	-0.141697	0.489919
GNAI1	0.485181	0.0164944	0.739289	0.000185558	-0.107174	0.710622	-0.270341	0.376601
ICAM1	2.84131	3.8911e-10	1.82271	8.00476e-07	1.47987	0.000109035	1.1707	0.0024286
ILK	0.563668	0.0061814	-0.402565	0.0510461	0.167752	0.53955	0.223861	0.506194
JAM3	-0.581963	0.405575	0.664482	0.243958	-0.330094	0.724507	0.204163	0.871784
LLGL1	-0.263258	0.101423	-0.219893	0.139649	-0.171949	0.382335	0.156131	0.53687
LLGL2	0.396478	0.123628	0.0847758	0.736617	0.274023	0.356822	0.178755	0.673115
MAGI1	0.246343	0.599563	-0.0769754	0.87608	-0.195627	0.777277	-0.49356	0.498456
MAGI2	-0.377946	0.759433	0.41599	0.733441	0.589867	0.723037	0.622268	0.768432
MARK2	1.11605	5.69104e-05	0.603327	0.0102614	0.163518	0.636433	-0.185841	0.687215
MPDZ	-0.0841227	0.702297	-0.692387	0.00160097	-0.079468	0.790015	0.129249	0.711766
MPP5	0.688803	0.00251965	0.671812	0.00105602	0.171889	0.536195	-0.255643	0.45913
MPP6	-0.165271	0.50344	-0.205466	0.386492	-0.131982	0.692205	-0.137478	0.750232
OCLN	2.3424	4.71538e-11	1.93187	1.58807e-09	0.529281	0.0496126	-0.381035	0.286998
PARD3	0.423055	0.0071477	0.680027	3.17614e-05	-0.0304134	0.905663	-0.0948635	0.747984
PARD6A	-1.79088	0.101924	-1.46169	0.207161	-0.158086	0.924648	0.257662	0.896465
PARD6B	1.35396	2.56734e-07	1.61883	7.02757e-09	0.469742	0.0545254	-0.216471	0.554581
PRKCI	0.133936	0.409674	-0.569873	0.00089055	0.0746716	0.751403	-0.19593	0.459497
PRKCZ	1.02428	0.000223432	0.719147	0.00422567	-0.147826	0.726165	0.0199896	0.976356
PTEN	0.179775	0.220065	0.0484808	0.745373	-0.206726	0.257076	-0.0999447	0.714369
RAC1	0.486749	0.0113595	0.22548	0.204329	0.0319296	0.921076	-0.0160211	0.973703
RHOA	-0.0534992	0.74182	0.158362	0.265897	-0.0924221	0.664649	-0.203864	0.395221
SMURF1	1.65293	1.07791e-10	1.50221	4.15662e-10	0.398145	0.0339164	0.0718477	0.834766
SPTAN1	-0.0256174	0.871307	0.00548016	0.970934	-0.164214	0.358263	-0.336576	0.0871273
SYMPK	-0.335252	0.123865	-0.0227212	0.914812	-0.37139	0.127891	-0.0905254	0.824013
TIAM1	1.75622	1.45579e-09	0.761353	0.000231159	0.221141	0.401001	0.21939	0.511878
TJAP1	0.499256	0.0322676	-0.303461	0.196239	-0.101729	0.765317	0.292728	0.375295
TJP1	0.58781	0.00338495	-0.305722	0.0999105	0.257984	0.26476	-0.0997883	0.803266
TJP2	1.30919	2.38572e-06	1.60816	3.51575e-08	0.34419	0.203292	0.0797314	0.873416
TJP3	1.9563	0.0150557	4.01122	2.82371e-06	1.96874	0.0292172	1.39536	0.249521
VAPA	0.174712	0.32276	0.151768	0.366565	-0.110723	0.657884	-0.151588	0.627009
YBX3	0.142613	0.293482	0.281747	0.0269543	0.0735749	0.707026	-0.0579684	0.844742
